# Supplementary material for: New Partners in Regulation of Gene Expression: The Enhancer of Trithorax and Polycomb Corto Interacts with Methylated Ribosomal Protein L12 Via Its Chromodomain
Source: PubMed Central journal article supplement (PMC3469418; doi:10.1371/journal.pgen.1003006), 2012-10-11
Supplement: pgen.1003006.s005.pdf [file pgen.1003006.s005.pdf]

| <b>Genotype</b>                         | <b>Flies observed</b> | <b>Lethality (%)</b> | <b>Duplicated macrochaetae (%)</b> | <b>Aristapedia (%)</b> | <b>Sex comb teeth</b><br>(n = number of male first legs observed) | <b>Rotated genitalia (%)</b><br>(n = number of males observed) |
|-----------------------------------------|-----------------------|----------------------|------------------------------------|------------------------|-------------------------------------------------------------------|----------------------------------------------------------------|
| <i>Act::Gal4&gt;UAS::FH-cortoCD-231</i> | 73                    | 63.0                 | 32.8***                            | 35.6***                | 8.8 ± 0.8*<br>(n=46)                                              | nd                                                             |
| <i>Act::Gal4&gt;UAS::FH-cortoCD-41</i>  | 143                   | 79.0                 | 30.0***                            | 34.3***                | 9.2 ± 1.1*<br>(n=35)                                              | nd                                                             |
| <i>Act::Gal4&gt;UAS::FH-cortoCD-45</i>  | 67                    | 76.0                 | 31.3***                            | 43.3***                | 8.6 ± 0.5*<br>(n=10)                                              | nd                                                             |
| <i>Act::Gal4/+</i>                      | 164                   | 22.5                 | 3.6                                | 0.6                    | 10.8 ± 0.7<br>(n=41)                                              | nd                                                             |
| <i>da::Gal4&gt;UAS::FH-cortoCD-231</i>  | 93                    | 91.0                 | 9.7***                             | 38.7***                | 8.8 ± 0.8*<br>(n=54)                                              | 55.0***<br>(n=45)                                              |
| <i>da::Gal4&gt;UAS::FH-cortoCD-41</i>   | 34                    | nd                   | 8.8**                              | 67.6***                | 8.7 ± 0.9*<br>(n=30)                                              | 59.0***<br>(n=16)                                              |
| <i>da::Gal4&gt;UAS::FH-cortoCD-45</i>   | 0                     | 100.0                | -                                  | -                      | -                                                                 | -                                                              |
| <i>da::Gal4/+</i>                       | 202                   | 19.0                 | 2.0                                | 0                      | 11.2 ± 0.8<br>(n=80)                                              | 0                                                              |
| <i>arm::Gal4&gt;UAS::corto</i>          | 210                   | 58.0                 | 8.1                                | 15.0***                | 10.9 ± 0.8<br>(n=58)                                              | 19.4***<br>(n=110)                                             |
| <i>arm::Gal4/+</i>                      | 200                   | 5.0                  | 6.5                                | 0                      | 11.2 ± 0.9<br>(n=50)                                              | 0<br>(n=100)                                                   |

**Table S1**
