# Supplementary material for: New Partners in Regulation of Gene Expression: The Enhancer of Trithorax and Polycomb Corto Interacts with Methylated Ribosomal Protein L12 Via Its Chromodomain
Source: PubMed Central journal article supplement (PMC3469418; doi:10.1371/journal.pgen.1003006), 2012-10-11
Supplement: pgen.1003006.s006.pdf [file pgen.1003006.s006.pdf]

**Table S2**

| <b>Band</b> | <b>Protein</b> | <b>CG</b>  | <b>MW<br/>(Da)</b> | <b>Score</b> | <b>Peptides</b> | <b>Coverage<br/>%</b> | <b>Sequences</b>                                            |
|-------------|----------------|------------|--------------------|--------------|-----------------|-----------------------|-------------------------------------------------------------|
| P30         | RpL7           | CG4897-PA  | 29534              | 107          | 2               | 10                    | R.QRVPITDNFVIER.K<br>R.IAEPYITWGYPNLK.S                     |
| P21         | RpS11          | CG8857     | 18101              | 38           | 2               | 9                     | K.QFGVNLNR.K<br>R.DYLFHVR.K                                 |
| P20         | RpS10          | CG14206-PC | 17867              | 42           | 1               | 8                     | K.GDVGPGAGEVEFR.G                                           |
|             | RpL12          | CG3195-PA  | 17585              | 56           | 2               | 14                    | K.IGPLGLSPK.K<br>R.CVGGEVGATSSLAPK.I + carbamidomethyl (C)  |
|             | RpL27          | CG4759-PA  | 15893              | 79           | 2               | 15                    | R.YTAHDISFEK.L<br>K.SLNYNHLMPTR.Y + oxidation (M)           |
| P15         | RpS14          | CG1524-PB  | 16255              | 82           | 3               | 17                    | K.EEVQVQLGPQVR.D<br>R.IEDVTPIPSDSTR.R<br>R.IEDVTPIPSDSTRR.K |
