# Supplementary material for: New Partners in Regulation of Gene Expression: The Enhancer of Trithorax and Polycomb Corto Interacts with Methylated Ribosomal Protein L12 Via Its Chromodomain
Source: PubMed Central journal article supplement (PMC3469418; doi:10.1371/journal.pgen.1003006), 2012-10-11
Supplement: pgen.1003006.s007.pdf [file pgen.1003006.s007.pdf]

Table S3

| Flybase Gene Symbol | Flybase ID Genes | Flybase ID Transcripts                                                                                                  | Number of read<br><i>sd::Gal4&gt;UAS::FH-cortocD</i> | <i>sd::Gal4/+</i> | Adjusted P-value | log <sub>2</sub> (FC) |
|---------------------|------------------|-------------------------------------------------------------------------------------------------------------------------|------------------------------------------------------|-------------------|------------------|-----------------------|
| <b>RpS10b</b>       | FBgn0261593      | FBtr0074731,FBtr0074732,FBtr0308192                                                                                     | 44201                                                | 22084             | 0                | 1,00108               |
| <b>pck</b>          | FBgn0013720      | FBtr0100198                                                                                                             | 2899                                                 | 1448              | 5.81826E-60      | 1,00149               |
| <b>CG10527</b>      | FBgn0034583      | FBtr0071541                                                                                                             | 1920                                                 | 959               | 5,93532E-40      | 1,00150               |
| <b>CG32212</b>      | FBgn0052212      | FBtr0074932                                                                                                             | 2549                                                 | 1273              | 7,35002E-53      | 1,00170               |
| <b>cic</b>          | FBgn0262582      | FBtr0305026,FBtr0305027,FBtr0305028,FBtr0305029,FBtr0305030,FBtr0305031                                                 | 8336                                                 | 4162              | 5,78156E-167     | 1,00208               |
| <b>pck</b>          | FBgn0013720      | FBtr0070255,FBtr0070256                                                                                                 | 2899                                                 | 1446              | 3,26466E-60      | 1,00349               |
| <b>Cchl</b>         | FBgn0038925      | FBtr0084185                                                                                                             | 1548                                                 | 772               | 1,50462E-32      | 1,00373               |
| <b>Vps28</b>        | FBgn0021814      | FBtr0088825                                                                                                             | 1470                                                 | 733               | 5,79182E-31      | 1,00393               |
| <b>sli</b>          | FBgn0003425      | FBtr0087302,FBtr0087303,FBtr0087304                                                                                     | 953                                                  | 475               | 2,24757E-20      | 1,00455               |
| <b>SmF</b>          | FBgn0000426      | FBtr0088010                                                                                                             | 2456                                                 | 1224              | 2,70685E-51      | 1,00471               |
| <b>Taf10</b>        | FBgn0028398      | FBtr0077717                                                                                                             | 1503                                                 | 749               | 1,01672E-31      | 1,00481               |
| <b>Rpl3</b>         | FBgn0020910      | FBtr0082347,FBtr0082346,FBtr0302586                                                                                     | 4538                                                 | 2260              | 2,31682E-94      | 1,00573               |
| <b>CG4036</b>       | FBgn0032149      | FBtr0303447,FBtr0303448                                                                                                 | 952                                                  | 474               | 1,66979E-20      | 1,00607               |
| <b>Updo</b>         | FBgn0033428      | FBtr0088524                                                                                                             | 2632                                                 | 1309              | 2,64901E-55      | 1,00769               |
| <b>pcx</b>          | FBgn0003048      | FBtr0070395                                                                                                             | 5417                                                 | 2692              | 2,81048E-113     | 1,00882               |
| <b>mRpL18</b>       | FBgn0026741      | FBtr0087852                                                                                                             | 872                                                  | 433               | 5,54362E-19      | 1,00996               |
| <b>rhea</b>         | FBgn0260442      | FBtr0076627,FBtr0305210,FBtr0305211,FBtr0305212                                                                         | 7452                                                 | 3695              | 1,07596E-152     | 1,01205               |
| <b>CG18343</b>      | FBgn0033683      | FBtr0087982                                                                                                             | 1309                                                 | 649               | 3,57281E-28      | 1,01217               |
| <b>CG4036</b>       | FBgn0032149      | FBtr0079870                                                                                                             | 964                                                  | 477               | 4,40730E-21      | 1,01504               |
| <b>CG13349</b>      | FBgn0033886      | FBtr0087610,FBtr0087611,FBtr0114493,FBtr0114494                                                                         | 3145                                                 | 1566              | 4,99432E-67      | 1,01522               |
| <b>CG30410</b>      | FBgn0050410      | FBtr0301852                                                                                                             | 3657                                                 | 1809              | 6,96792E-78      | 1,01547               |
| <b>CG10664</b>      | FBgn0032833      | FBtr0081300,FBtr0081301                                                                                                 | 5363                                                 | 2652              | 5,97598E-114     | 1,01596               |
| <b>CG13349</b>      | FBgn0033886      | FBtr0114495                                                                                                             | 3147                                                 | 1566              | 3,19282E-67      | 1,01614               |
| <b>CG8891</b>       | FBgn0031663      | FBtr0079048                                                                                                             | 1568                                                 | 775               | 6,70087E-34      | 1,01666               |
| <b>RpS30</b>        | FBgn0038834      | FBtr0083969,FBtr0083970                                                                                                 | 20690                                                | 10221             | 0                | 1,01740               |
| <b>hang</b>         | FBgn0026575      | FBtr0074276,FBtr0074277                                                                                                 | 4445                                                 | 2195              | 4,82424E-95      | 1,01796               |
| <b>CG1707</b>       | FBgn0033162      | FBtr0089013                                                                                                             | 4362                                                 | 2152              | 1,39310E-93      | 1,01931               |
| <b>Cpr49Ah</b>      | FBgn0033731      | FBtr0087924                                                                                                             | 987                                                  | 486               | 5,76268E-22      | 1,02209               |
| <b>CG34347</b>      | FBgn0085376      | FBtr0290046                                                                                                             | 1020                                                 | 502               | 1,01302E-22      | 1,02281               |
| <b>Rpb12</b>        | FBgn0262954      | FBtr0112379                                                                                                             | 1685                                                 | 828               | 4,30839E-37      | 1,02505               |
| <b>CG15012</b>      | FBgn0035528      | FBtr0073240                                                                                                             | 810                                                  | 398               | 3,06267E-18      | 1,02515               |
| <b>CG9034</b>       | FBgn0040931      | FBtr0071343                                                                                                             | 922                                                  | 453               | 1,10836E-20      | 1,02526               |
| <b>PDCD-5</b>       | FBgn0036580      | FBtr0075483                                                                                                             | 3710                                                 | 1822              | 6,87942E-81      | 1,02590               |
| <b>larp</b>         | FBgn0261618      | FBtr0301180,FBtr0306389,FBtr0306390                                                                                     | 1908                                                 | 937               | 5,27586E-42      | 1,02594               |
| <b>mRpS11</b>       | FBgn0038474      | FBtr0089894                                                                                                             | 1001                                                 | 491               | 1,71900E-22      | 1,02765               |
| <b>Probeta1</b>     | FBgn0010590      | FBtr0087262                                                                                                             | 6364                                                 | 3114              | 9,22842E-140     | 1,03116               |
| <b>rut</b>          | FBgn0003301      | FBtr0073992,FBtr0305581                                                                                                 | 3391                                                 | 1659              | 6,95553E-75      | 1,03140               |
| <b>CG15012</b>      | FBgn0035528      | FBtr0300776                                                                                                             | 808                                                  | 395               | 1,54694E-18      | 1,03250               |
| <b>bou</b>          | FBgn0261284      | FBtr0071004                                                                                                             | 2997                                                 | 1465              | 1,94792E-66      | 1,03262               |
| <b>obst-B</b>       | FBgn0027600      | FBtr0079934                                                                                                             | 3357                                                 | 1640              | 2,02164E-74      | 1,03348               |
| <b>Rbcn-3A</b>      | FBgn0023458      | FBtr0303341                                                                                                             | 10392                                                | 5071              | 1,08035E-223     | 1,03513               |
| <b>mei-P26</b>      | FBgn0026206      | FBtr0071303                                                                                                             | 4958                                                 | 2419              | 5,24173E-110     | 1,03535               |
| <b>CG30423</b>      | FBgn0050423      | FBtr0300122                                                                                                             | 3189                                                 | 1555              | 3,45868E-71      | 1,03619               |
| <b>CG30185</b>      | FBgn0050185      | FBtr0072060                                                                                                             | 1526                                                 | 744               | 1,62240E-34      | 1,03638               |
| <b>Ten-a</b>        | FBgn0259240      | FBtr0300201,FBtr0300202,FBtr0300203,FBtr0300204,FBtr0299858,FBtr0299859,FBtr0299860,FBtr0308221,FBtr0308222,FBtr0308223 | 22588                                                | 11010             | 0                | 1,03674               |
| <b>m2</b>           | FBgn0002592      | FBtr0084981                                                                                                             | 3400                                                 | 1657              | 6,12686E-76      | 1,03696               |
| <b>Arp11</b>        | FBgn0031050      | FBtr0074760                                                                                                             | 1705                                                 | 830               | 1,31642E-38      | 1,03859               |
| <b>Spase22-23</b>   | FBgn0039172      | FBtr0305044                                                                                                             | 10017                                                | 4874              | 1,47481E-217     | 1,03927               |
| <b>CG6878</b>       | FBgn0036488      | FBtr0075643                                                                                                             | 1252                                                 | 609               | 1,10402E-28      | 1,03972               |
| <b>ATPsyn-Cf6</b>   | FBgn0016119      | FBtr0084432,FBtr0305982                                                                                                 | 3169                                                 | 1541              | 2,33932E-71      | 1,04016               |
| <b>RpS13</b>        | FBgn0010265      | FBtr0079724,FBtr0100541                                                                                                 | 79412                                                | 38614             | 0                | 1,04023               |
| <b>CG5548</b>       | FBgn0030605      | FBtr0073960                                                                                                             | 1533                                                 | 745               | 5,57960E-35      | 1,04105               |
| <b>dom</b>          | FBgn0020306      | FBtr0071602,FBtr0071603,FBtr0071604,FBtr0301350                                                                         | 4443                                                 | 2159              | 5,51313E-100     | 1,04117               |
| <b>CG6746</b>       | FBgn0032394      | FBtr0080313                                                                                                             | 1774                                                 | 862               | 2,01221E-40      | 1,04125               |
| <b>fwf</b>          | FBgn0004373      | FBtr0072516                                                                                                             | 826                                                  | 401               | 2,49966E-19      | 1,04254               |
| <b>Bruce</b>        | FBgn0037808      | FBtr0082239                                                                                                             | 16056                                                | 7785              | 0                | 1,04434               |
| <b>CG11999</b>      | FBgn0037312      | FBtr0078807                                                                                                             | 1977                                                 | 957               | 2,06572E-45      | 1,04672               |
| <b>l(2)37Cg</b>     | FBgn0086447      | FBtr0081161                                                                                                             | 798                                                  | 386               | 6,16178E-19      | 1,04779               |
| <b>CG5446</b>       | FBgn0032429      | FBtr0080388                                                                                                             | 3732                                                 | 1804              | 1,77975E-85      | 1,04875               |
| <b>Tpi</b>          | FBgn0086355      | FBtr0085584                                                                                                             | 4221                                                 | 2040              | 1,30830E-96      | 1,04902               |
| <b>tweek</b>        | FBgn0261671      | FBtr0304927,FBtr0304928,FBtr0304929,FBtr0304930                                                                         | 6595                                                 | 3187              | 1,37337E-150     | 1,04917               |
| <b>Act5C</b>        | FBgn0000042      | FBtr0070823                                                                                                             | 7261                                                 | 3508              | 2,57214E-161     | 1,04952               |
| <b>Act57B</b>       | FBgn0000044      | FBtr0300946                                                                                                             | 3932                                                 | 1899              | 2,85891E-90      | 1,05002               |
| <b>Act57B</b>       | FBgn0000044      | FBtr0071519                                                                                                             | 3931                                                 | 1898              | 2,63649E-90      | 1,05042               |
| <b>Spase12</b>      | FBgn0040623      | FBtr0085435                                                                                                             | 1830                                                 | 883               | 1,61959E-42      | 1,05136               |
| <b>CR41548</b>      | FBgn0085802      | FBtr0114256                                                                                                             | 2815                                                 | 1357              | 3,44527E-65      | 1,05271               |
| <b>CG2862</b>       | FBgn0031459      | FBtr0077718                                                                                                             | 5162                                                 | 2486              | 2,82840E-119     | 1,05410               |
| <b>sni</b>          | FBgn0030026      | FBtr0071183                                                                                                             | 840                                                  | 404               | 3,97114E-20      | 1,05603               |
| <b>Dhc64C</b>       | FBgn0261797      | FBtr0273370,FBtr0073359                                                                                                 | 26306                                                | 12641             | 0                | 1,05728               |
| <b>CG13185</b>      | FBgn0033661      | FBtr0113071                                                                                                             | 5574                                                 | 2677              | 7,47688E-130     | 1,05810               |
| <b>CG32276</b>      | FBgn0047135      | FBtr0073107                                                                                                             | 1048                                                 | 503               | 4,45874E-25      | 1,05901               |
| <b>CG13751</b>      | FBgn0033340      | FBtr0088644                                                                                                             | 1342                                                 | 644               | 6,61190E-32      | 1,05925               |
| <b>Nxt1</b>         | FBgn0028411      | FBtr0072241                                                                                                             | 1041                                                 | 499               | 5,13712E-25      | 1,06086               |
| <b>CG9603</b>       | FBgn0040529      | FBtr0081855,FBtr0305680                                                                                                 | 7612                                                 | 3647              | 2,24491E-173     | 1,06157               |
| <b>Nurf-38</b>      | FBgn0016687      | FBtr0305985                                                                                                             | 2779                                                 | 1331              | 1,08241E-65      | 1,06206               |
| <b>CG32276</b>      | FBgn0047135      | FBtr0073106                                                                                                             | 1086                                                 | 520               | 3,29877E-26      | 1,06244               |
| <b>PHGPx</b>        | FBgn0035438      | FBtr0073066,FBtr0073067,FBtr0073068                                                                                     | 5639                                                 | 2700              | 1,31506E-132     | 1,06248               |
| <b>CG11505</b>      | FBgn0035424      | FBtr0073045,FBtr0073046,FBtr0308061                                                                                     | 7684                                                 | 3679              | 2,31078E-175     | 1,06254               |
| <b>CR40959</b>      | FBgn0085777      | FBtr0114228                                                                                                             | 4012                                                 | 1920              | 1,30836E-94      | 1,06322               |
| <b>CG3621</b>       | FBgn0025839      | FBtr0070386                                                                                                             | 1114                                                 | 533               | 7,17632E-27      | 1,06354               |
| <b>CG13185</b>      | FBgn0033661      | FBtr0113072                                                                                                             | 5755                                                 | 2748              | 2,00142E-136     | 1,06643               |
| <b>Tpi</b>          | FBgn0086355      | FBtr0085582,FBtr0085583                                                                                                 | 4179                                                 | 1994              | 1,87672E-99      | 1,06749               |
| <b>CR40621</b>      | FBgn0085757      | FBtr0114207                                                                                                             | 5659                                                 | 2700              | 1,86684E-134     | 1,06759               |
| <b>nocte</b>        | FBgn0261710      | FBtr0071461                                                                                                             | 2003                                                 | 955               | 3,18899E-48      | 1,06859               |
| <b>tutl</b>         | FBgn0010473      | FBtr0089271,FBtr0089269,FBtr0089270,FBtr0301863,FBtr0301864                                                             | 1544                                                 | 736               | 2,56970E-37      | 1,06890               |

|                   |             |                                                                                                             |        |       |              |                |
|-------------------|-------------|-------------------------------------------------------------------------------------------------------------|--------|-------|--------------|----------------|
| <b>CG13630</b>    | FBgn0039219 | FBtr0084745                                                                                                 | 2361   | 1123  | 4,69705E-57  | <b>1,07204</b> |
| <b>CG6891</b>     | FBgn0030955 | FBtr0074631                                                                                                 | 14114  | 6711  | 0            | <b>1,07253</b> |
| <b>br</b>         | FBgn0000210 | FBtr0300430                                                                                                 | 3537   | 1680  | 1,75454E-85  | <b>1,07406</b> |
| <b>CG8206</b>     | FBgn0030679 | FBtr0074085                                                                                                 | 906    | 430   | 1,41203E-22  | <b>1,07517</b> |
| <b>Pros29</b>     | FBgn0261394 | FBtr0071522                                                                                                 | 9558   | 4531  | 1,91552E-224 | <b>1,07688</b> |
| <b>CG5703</b>     | FBgn0030853 | FBtr0074452                                                                                                 | 2013   | 953   | 1,98151E-49  | <b>1,07880</b> |
| <b>CG5903</b>     | FBgn0038400 | FBtr0083281                                                                                                 | 5124   | 2423  | 3,85832E-125 | <b>1,08048</b> |
| <b>RpS5a</b>      | FBgn0002590 | FBtr0074406                                                                                                 | 78164  | 36960 | 0            | <b>1,08054</b> |
| <b>trx</b>        | FBgn0003862 | FBtr0082950,FBtr0082949,FBtr0082947,FBtr0082948,FBtr0100277                                                 | 13801  | 6521  | 0            | <b>1,08161</b> |
| <b>CG34439</b>    | FBgn0085468 | FBtr0112740,FBtr0112741                                                                                     | 999    | 472   | 4,58604E-25  | <b>1,08170</b> |
| <b>CG9669</b>     | FBgn0036667 | FBtr0075339,FBtr0305272                                                                                     | 1488   | 703   | 5,63998E-37  | <b>1,08178</b> |
| <b>RpS19a</b>     | FBgn0010412 | FBtr0074312,FBtr0074313,FBtr0074311                                                                         | 75397  | 35551 | 0            | <b>1,08462</b> |
| <b>CG11753</b>    | FBgn0037603 | FBtr0081879                                                                                                 | 895    | 422   | 1,16551E-22  | <b>1,08464</b> |
| <b>malpha</b>     | FBgn0002732 | FBtr0084956                                                                                                 | 5935   | 2798  | 4,30082E-146 | <b>1,08485</b> |
| <b>RFeSP</b>      | FBgn0021906 | FBtr0077914,FBtr0077915                                                                                     | 722    | 340   | 1,55017E-18  | <b>1,08646</b> |
| <b>CG15237</b>    | FBgn0033104 | FBtr0086212                                                                                                 | 1143   | 538   | 5,88978E-29  | <b>1,08715</b> |
| <b>Spase22-23</b> | FBgn0039172 | FBtr0084564                                                                                                 | 9906   | 4659  | 5,95698E-238 | <b>1,08828</b> |
| <b>Tina-1</b>     | FBgn0035083 | FBtr0072411                                                                                                 | 4210   | 1798  | 6,35904E-105 | <b>1,08978</b> |
|                   |             | FBtr0273184                                                                                                 | 2365   | 1111  | 2,86998E-59  | <b>1,08998</b> |
| <b>Roc1a</b>      | FBgn0025638 | FBtr0070122                                                                                                 | 2363   | 1110  | 3,35908E-59  | <b>1,09006</b> |
| <b>CG11267</b>    | FBgn0036334 | FBtr0075875                                                                                                 | 6335   | 2969  | 1,32459E-158 | <b>1,09337</b> |
| <b>RpS6</b>       | FBgn0261592 | FBtr0071135,FBtr0071136                                                                                     | 108886 | 50993 | 0            | <b>1,09445</b> |
| <b>CG12203</b>    | FBgn0031021 | FBtr0074712                                                                                                 | 1921   | 899   | 7,57751E-49  | <b>1,09546</b> |
| <b>CG17680</b>    | FBgn0062440 | FBtr0086781                                                                                                 | 1302   | 609   | 2,11499E-33  | <b>1,09622</b> |
| <b>eIF-3p40</b>   | FBgn0022023 | FBtr0079030,FBtr0079031                                                                                     | 19533  | 9133  | 0            | <b>1,09675</b> |
| <b>Smr</b>        | FBgn0024308 | FBtr0073706,FBtr0073707,FBtr0073708                                                                         | 21018  | 9819  | 0            | <b>1,09798</b> |
| <b>RpS9</b>       | FBgn0010408 | FBtr0076424                                                                                                 | 15140  | 7070  | 0            | <b>1,09858</b> |
| <b>CG3500</b>     | FBgn0034849 | FBtr0072038                                                                                                 | 892    | 416   | 2,62942E-23  | <b>1,10046</b> |
| <b>CG17202</b>    | FBgn0038043 | FBtr0082587                                                                                                 | 2685   | 1252  | 1,25176E-68  | <b>1,10069</b> |
| <b>CG2812</b>     | FBgn0034931 | FBtr0072140                                                                                                 | 1622   | 756   | 8,77155E-42  | <b>1,10132</b> |
| <b>CG5569</b>     | FBgn0034919 | FBtr0072128                                                                                                 | 717    | 334   | 5,63781E-19  | <b>1,10213</b> |
| <b>Neb-cGP</b>    | FBgn0083167 | FBtr0071449                                                                                                 | 5476   | 2550  | 9,09946E-140 | <b>1,10263</b> |
| <b>CG31548</b>    | FBgn0051548 | FBtr0078736                                                                                                 | 1164   | 542   | 2,20963E-30  | <b>1,10273</b> |
| <b>CG9240</b>     | FBgn0030669 | FBtr0074060                                                                                                 | 1113   | 517   | 3,07163E-29  | <b>1,10622</b> |
| <b>N</b>          | FBgn0004647 | FBtr0070507,FBtr0304659                                                                                     | 44071  | 20453 | 0            | <b>1,10752</b> |
| <b>Rpb11</b>      | FBgn0032634 | FBtr0081011                                                                                                 | 1341   | 621   | 2,24716E-35  | <b>1,11064</b> |
| <b>RpL14</b>      | FBgn0017579 | FBtr0076633                                                                                                 | 42610  | 19705 | 0            | <b>1,11263</b> |
| <b>Got2</b>       | FBgn0001125 | FBtr0077867,FBtr0077868                                                                                     | 911    | 421   | 2,18921E-24  | <b>1,11363</b> |
| <b>RpS4</b>       | FBgn0011284 | FBtr0075884,FBtr0075885                                                                                     | 104248 | 48111 | 0            | <b>1,11558</b> |
| <b>SmD2</b>       | FBgn0261789 | FBtr0081737                                                                                                 | 5038   | 2324  | 3,76841E-132 | <b>1,11624</b> |
| <b>mRpL22</b>     | FBgn0030786 | FBtr0074330                                                                                                 | 1702   | 785   | 3,98575E-45  | <b>1,11647</b> |
| <b>Arf79F</b>     | FBgn0010348 | FBtr0078574                                                                                                 | 1835   | 846   | 1,07618E-48  | <b>1,11705</b> |
| <b>CG2862</b>     | FBgn0031459 | FBtr0077719                                                                                                 | 5573   | 2569  | 2,08954E-146 | <b>1,11725</b> |
| <b>RpS9</b>       | FBgn0010408 | FBtr0076423,FBtr0076425                                                                                     | 14743  | 6794  | 0            | <b>1,11770</b> |
| <b>skpA</b>       | FBgn0025637 | FBtr0070124                                                                                                 | 1637   | 753   | 7,80107E-44  | <b>1,12033</b> |
| <b>SdhC</b>       | FBgn0037873 | FBtr0082372                                                                                                 | 2140   | 983   | 2,89397E-57  | <b>1,12235</b> |
| <b>CG3560</b>     | FBgn0030733 | FBtr0074216                                                                                                 | 2826   | 1298  | 2,27455E-75  | <b>1,12247</b> |
| <b>poe</b>        | FBgn0011230 | FBtr0079545                                                                                                 | 26949  | 12354 | 0            | <b>1,12525</b> |
| <b>CG42377</b>    | FBgn0259744 | FBtr0299980                                                                                                 | 660    | 302   | 1,97716E-18  | <b>1,12792</b> |
| <b>RpS26</b>      | FBgn0261597 | FBtr0081090,FBtr0081089                                                                                     | 18376  | 8397  | 0            | <b>1,12988</b> |
| <b>CR31144</b>    | FBgn0051144 | FBtr0303864                                                                                                 | 32532  | 14849 | 0            | <b>1,13149</b> |
| <b>RpL3</b>       | FBgn0020910 | FBtr0082347                                                                                                 | 32534  | 14850 | 0            | <b>1,13149</b> |
| <b>Trxr-1</b>     | FBgn0020653 | FBtr0071168                                                                                                 | 1028   | 468   | 1,23313E-28  | <b>1,13526</b> |
| <b>B52</b>        | FBgn0004587 | FBtr0082804,FBtr0082806                                                                                     | 3909   | 1779  | 1,53914E-106 | <b>1,13573</b> |
| <b>RpL9</b>       | FBgn0015756 | FBtr0080163,FBtr0080164                                                                                     | 57751  | 26270 | 0            | <b>1,13643</b> |
| <b>CG5941</b>     | FBgn0029833 | FBtr0070867,FBtr0305344                                                                                     | 1761   | 801   | 1,75916E-48  | <b>1,13652</b> |
| <b>mRpL27</b>     | FBgn0053002 | FBtr0077451                                                                                                 | 907    | 443   | 2,81006E-27  | <b>1,13810</b> |
| <b>14-3-3zeta</b> | FBgn0004907 | FBtr0088412                                                                                                 | 773    | 351   | 7,68583E-22  | <b>1,13900</b> |
| <b>cic</b>        | FBgn0262582 | FBtr0305029                                                                                                 | 7999   | 3622  | 2,10832E-213 | <b>1,14303</b> |
| <b>mRpL55</b>     | FBgn0038678 | FBtr0083754                                                                                                 | 815    | 369   | 3,64282E-23  | <b>1,14318</b> |
| <b>B52</b>        | FBgn0004587 | FBtr0082801,FBtr0082802,FBtr0082803,FBtr0300586,FBtr0300588,FBtr0300589,FBtr0308195,FBtr0308196,FBtr0308197 | 3866   | 1747  | 1,82879E-107 | <b>1,14596</b> |
| <b>CG11015</b>    | FBgn0031830 | FBtr0079288                                                                                                 | 6391   | 2887  | 2,08576E-177 | <b>1,14647</b> |
| <b>wb</b>         | FBgn0261563 | FBtr0302731,FBtr0305063                                                                                     | 658    | 297   | 4,47687E-19  | <b>1,14762</b> |
| <b>CG13993</b>    | FBgn0031776 | FBtr0079191                                                                                                 | 2756   | 1243  | 3,04272E-77  | <b>1,14875</b> |
| <b>Cypl</b>       | FBgn0035141 | FBtr0072564                                                                                                 | 1003   | 452   | 1,17629E-28  | <b>1,14993</b> |
| <b>CG11873</b>    | FBgn0039633 | FBtr0085365                                                                                                 | 14712  | 6623  | 0            | <b>1,15144</b> |
| <b>mRpS16</b>     | FBgn0033907 | FBtr0087578                                                                                                 | 1069   | 481   | 1,29678E-30  | <b>1,15215</b> |
| <b>CG11699</b>    | FBgn0030311 | FBtr0073510                                                                                                 | 1954   | 879   | 2,13060E-55  | <b>1,15250</b> |
| <b>Cctgamma</b>   | FBgn0015019 | FBtr0083338                                                                                                 | 816    | 367   | 1,40345E-23  | <b>1,15279</b> |
| <b>CG9603</b>     | FBgn0040529 | FBtr0081855                                                                                                 | 2274   | 1021  | 1,13655E-64  | <b>1,15525</b> |
| <b>Elongin-C</b>  | FBgn0023211 | FBtr0086541                                                                                                 | 987    | 442   | 1,21186E-28  | <b>1,15900</b> |
| <b>TfIIA-S</b>    | FBgn0011347 | FBtr0084526                                                                                                 | 5528   | 2474  | 2,41248E-157 | <b>1,15991</b> |
| <b>RpII15</b>     | FBgn0004855 | FBtr0082925                                                                                                 | 2492   | 1114  | 1,60129E-71  | <b>1,16155</b> |
| <b>CG7603</b>     | FBgn0036726 | FBtr0075220                                                                                                 | 1772   | 792   | 3,42111E-51  | <b>1,16181</b> |
| <b>CG30499</b>    | FBgn0050499 | FBtr0088954                                                                                                 | 2692   | 1203  | 2,52268E-77  | <b>1,16204</b> |
| <b>osa</b>        | FBgn0261885 | FBtr0301487,FBtr0089582,FBtr0089581                                                                         | 1092   | 487   | 5,02737E-32  | <b>1,16498</b> |
| <b>Cpr66D</b>     | FBgn0052029 | FBtr0076567                                                                                                 | 747    | 333   | 3,53073E-22  | <b>1,16559</b> |
| <b>larp</b>       | FBgn0261618 | FBtr0301180                                                                                                 | 633    | 282   | 5,87390E-19  | <b>1,16651</b> |
| <b>RpS3</b>       | FBgn0002622 | FBtr0084410                                                                                                 | 128804 | 57350 | 0            | <b>1,16731</b> |
| <b>sdk</b>        | FBgn0021764 | FBtr0302259                                                                                                 | 703    | 313   | 6,18479E-21  | <b>1,16736</b> |
| <b>CG12384</b>    | FBgn0033624 | FBtr0304698                                                                                                 | 701    | 312   | 5,52714E-21  | <b>1,16787</b> |
| <b>asrij</b>      | FBgn0034793 | FBtr0071902                                                                                                 | 1329   | 591   | 4,60990E-39  | <b>1,16911</b> |
| <b>Actn</b>       | FBgn0000667 | FBtr0070345,FBtr0070343,FBtr0070344                                                                         | 758    | 337   | 1,13129E-22  | <b>1,16945</b> |
| <b>Elongin-C</b>  | FBgn0023211 | FBtr0086540                                                                                                 | 937    | 416   | 6,68169E-28  | <b>1,17147</b> |
| <b>CG9674</b>     | FBgn0036663 | FBtr0075341,FBtr0075344,FBtr0305915,FBtr0305916                                                             | 4623   | 2052  | 1,26264E-134 | <b>1,17180</b> |
| <b>mRpL49</b>     | FBgn0030433 | FBtr0073691                                                                                                 | 762    | 338   | 7,53277E-23  | <b>1,17277</b> |
| <b>CG3566</b>     | FBgn0029854 | FBtr0089869,FBtr0089870,FBtr0305177                                                                         | 787    | 349   | 1,36289E-23  | <b>1,17314</b> |
| <b>CG3731</b>     | FBgn0038271 | FBtr0083001                                                                                                 | 774    | 343   | 2,64726E-23  | <b>1,17412</b> |
| <b>RpL10Ab</b>    | FBgn0036213 | FBtr0302135                                                                                                 | 5163   | 2286  | 2,84297E-151 | <b>1,17538</b> |
| <b>Tao-1</b>      | FBgn0031030 | FBtr0074771,FBtr0303999                                                                                     | 11078  | 490   | 3,95967E-33  | <b>1,17710</b> |
| <b>tyf</b>        | FBgn0026083 | FBtr0070643,FBtr0300931,FBtr0305180,FBtr0305181,FBtr0305182                                                 | 1771   | 783   | 1,29241E-52  | <b>1,17748</b> |
| <b>RpS15</b>      | FBgn0034138 | FBtr0087124                                                                                                 | 659    | 291   | 3,95890E-20  | <b>1,17926</b> |
| <b>HP4</b>        | FBgn0035829 | FBtr0076765                                                                                                 | 2170   | 958   | 1,82191E-64  | <b>1,17960</b> |

|                   |             |                                                                                                                                                                                                                                                                         |       |       |              |         |
|-------------------|-------------|-------------------------------------------------------------------------------------------------------------------------------------------------------------------------------------------------------------------------------------------------------------------------|-------|-------|--------------|---------|
| <b>CG2200</b>     | FBgn0030447 | FBtr0073721                                                                                                                                                                                                                                                             | 1236  | 545   | 3,38571E-37  | 1,18135 |
| <b>CG3446</b>     | FBgn0029868 | FBtr0070924                                                                                                                                                                                                                                                             | 3564  | 1571  | 6,96157E-106 | 1,18181 |
| <b>CG34422</b>    | FBgn0085451 | FBtr0112723                                                                                                                                                                                                                                                             | 2761  | 1217  | 4,05808E-82  | 1,18186 |
| <b>HP4</b>        | FBgn0035829 | FBtr0076764                                                                                                                                                                                                                                                             | 2169  | 956   | 1,14015E-64  | 1,18195 |
| <b>Art79F</b>     | FBgn0010348 | FBtr0078573                                                                                                                                                                                                                                                             | 1807  | 796   | 3,55313E-54  | 1,18276 |
| <b>GstD1</b>      | FBgn0001149 | FBtr0082607                                                                                                                                                                                                                                                             | 24617 | 10835 | 0            | 1,18396 |
| <b>CG8036</b>     | FBgn0037607 | FBtr0081881                                                                                                                                                                                                                                                             | 4979  | 2191  | 2,91866E-148 | 1,18427 |
| <b>CG5261</b>     | FBgn0031912 | FBtr0079444                                                                                                                                                                                                                                                             | 909   | 400   | 9,98471E-28  | 1,18428 |
| <b>CG12432</b>    | FBgn0030843 | FBtr0074433                                                                                                                                                                                                                                                             | 1032  | 454   | 2,22501E-31  | 1,18468 |
| <b>LRP1</b>       | FBgn0053087 | FBtr0088791                                                                                                                                                                                                                                                             | 11637 | 5118  | 0            | 1,18507 |
| <b>CG8036</b>     | FBgn0037607 | FBtr0081882                                                                                                                                                                                                                                                             | 4979  | 2188  | 9,60122E-149 | 1,18624 |
| <b>Got2</b>       | FBgn0001125 | FBtr0100359                                                                                                                                                                                                                                                             | 1712  | 750   | 4,28699E-52  | 1,19072 |
| <b>CG3609</b>     | FBgn0031418 | FBtr0077791,FBtr0303027                                                                                                                                                                                                                                                 | 1532  | 671   | 1,22177E-46  | 1,19103 |
| <b>CG30415</b>    | FBgn0250838 | FBtr0072030,FBtr0072031                                                                                                                                                                                                                                                 | 2360  | 1031  | 6,25220E-72  | 1,19474 |
| <b>RpL37A</b>     | FBgn0261608 | FBtr0302570,FBtr0079016                                                                                                                                                                                                                                                 | 10786 | 4711  | 2,3426E-315  | 1,19505 |
| <b>awd</b>        | FBgn0000150 | FBtr0085864                                                                                                                                                                                                                                                             | 56390 | 24628 | 0            | 1,19514 |
| <b>RpL37A</b>     | FBgn0261608 | FBtr0079017                                                                                                                                                                                                                                                             | 10833 | 4731  | 8,1482E-317  | 1,19522 |
| <b>l(1)G0255</b>  | FBgn0028336 | FBtr0070953                                                                                                                                                                                                                                                             | 733   | 320   | 5,31699E-23  | 1,19574 |
| <b>vfl</b>        | FBgn0259789 | FBtr0307536,FBtr0307537                                                                                                                                                                                                                                                 | 15475 | 6742  | 0            | 1,19869 |
| <b>RpL30</b>      | FBgn0086710 | FBtr0302491,FBtr0081181                                                                                                                                                                                                                                                 | 7996  | 3480  | 5,95090E-236 | 1,20019 |
| <b>mRpL48</b>     | FBgn0031357 | FBtr0077882                                                                                                                                                                                                                                                             | 669   | 291   | 3,72146E-21  | 1,20099 |
| <b>sea</b>        | FBgn0037912 | FBtr0100464                                                                                                                                                                                                                                                             | 6494  | 2819  | 5,92255E-200 | 1,20392 |
| <b>fabp</b>       | FBgn0037913 | FBtr0100320,FBtr0100321,FBtr0100323                                                                                                                                                                                                                                     | 6494  | 2819  | 5,92255E-200 | 1,20392 |
| <b>olf186-F</b>   | FBgn0041585 | FBtr0086796,FBtr0086797                                                                                                                                                                                                                                                 | 694   | 301   | 4,62433E-22  | 1,20517 |
| <b>RpS7</b>       | FBgn0039757 | FBtr0089425,FBtr0089422,FBtr0089423                                                                                                                                                                                                                                     | 69140 | 29982 | 0            | 1,20542 |
| <b>Aldh-III</b>   | FBgn0010548 | FBtr0300477                                                                                                                                                                                                                                                             | 595   | 258   | 4,85430E-19  | 1,20552 |
| <b>RpS15</b>      | FBgn0034138 | FBtr0087123                                                                                                                                                                                                                                                             | 677   | 293   | 9,35480E-22  | 1,20826 |
| <b>p16-ARC</b>    | FBgn0031437 | FBtr0077694                                                                                                                                                                                                                                                             | 3717  | 1608  | 1,12935E-115 | 1,20887 |
| <b>CR40728</b>    | FBgn0085769 | FBtr0114219                                                                                                                                                                                                                                                             | 3815  | 1648  | 3,30772E-119 | 1,21097 |
| <b>vsg</b>        | FBgn0045823 | FBtr0076399,FBtr0076401                                                                                                                                                                                                                                                 | 1503  | 649   | 1,79102E-47  | 1,21155 |
| <b>mRpL42</b>     | FBgn0033480 | FBtr0088403                                                                                                                                                                                                                                                             | 856   | 369   | 1,77519E-27  | 1,21399 |
| <b>mRpL42</b>     | FBgn0033480 | FBtr0305670                                                                                                                                                                                                                                                             | 856   | 369   | 1,77519E-27  | 1,21399 |
| <b>mRpL42</b>     | FBgn0033480 | FBtr0304041                                                                                                                                                                                                                                                             | 856   | 369   | 1,77519E-27  | 1,21399 |
| <b>Arc-p20</b>    | FBgn0031781 | FBtr0079200                                                                                                                                                                                                                                                             | 2176  | 935   | 3,68671E-69  | 1,21864 |
| <b>stv</b>        | FBgn0086708 | FBtr0075806,FBtr0075807,FBtr0075809                                                                                                                                                                                                                                     | 2559  | 1098  | 1,75260E-81  | 1,22070 |
| <b>shot</b>       | FBgn0013733 | FBtr0301964,FBtr0087621,FBtr0087617,FBtr0087618,FBtr0087619,FBtr0087620,FBtr0087616,FBtr0273222,FBtr0273223,FBtr0273224,FBtr0273225,FBtr0273226,FBtr0301591,FBtr0301592,FBtr0301593,FBtr0304847,FBtr0304848,FBtr0304849,FBtr0304850,FBtr0304851,FBtr0304852,FBtr0304853 | 15882 | 6807  | 0            | 1,22230 |
| <b>stv</b>        | FBgn0086708 | FBtr0075808,FBtr0113425                                                                                                                                                                                                                                                 | 2770  | 1187  | 1,88171E-88  | 1,22257 |
| <b>GstD1</b>      | FBgn0001149 | FBtr0100410                                                                                                                                                                                                                                                             | 24045 | 10303 | 0            | 1,22267 |
| <b>betaTub56D</b> | FBgn0003887 | FBtr0086536                                                                                                                                                                                                                                                             | 24093 | 10277 | 0            | 1,22919 |
| <b>CG10418</b>    | FBgn0036277 | FBtr0075954                                                                                                                                                                                                                                                             | 1130  | 482   | 5,34231E-37  | 1,22922 |
| <b>CG8191</b>     | FBgn0030675 | FBtr0074083                                                                                                                                                                                                                                                             | 952   | 406   | 2,84011E-31  | 1,22948 |
| <b>HSPC300</b>    | FBgn0061198 | FBtr0072194                                                                                                                                                                                                                                                             | 1456  | 619   | 8,38802E-48  | 1,23400 |
| <b>mRpL51</b>     | FBgn0032053 | FBtr0079696                                                                                                                                                                                                                                                             | 1482  | 630   | 1,16560E-48  | 1,23412 |
| <b>zormin</b>     | FBgn0052311 | FBtr0089864,FBtr0110856,FBtr0110857,FBtr0110858                                                                                                                                                                                                                         | 3974  | 1689  | 3,42259E-129 | 1,23442 |
| <b>w</b>          | FBgn0003996 | FBtr0070490                                                                                                                                                                                                                                                             | 18794 | 7981  | 0            | 1,23563 |
| <b>CG11438</b>    | FBgn0037164 | FBtr0078504                                                                                                                                                                                                                                                             | 2040  | 865   | 4,89774E-67  | 1,23780 |
| <b>RpL13</b>      | FBgn0011272 | FBtr0079888,FBtr0100164                                                                                                                                                                                                                                                 | 70213 | 29771 | 0            | 1,23783 |
| <b>br</b>         | FBgn0000210 | FBtr0070261,FBtr0070262,FBtr0070263,FBtr0070265,FBtr0070266,FBtr0300427,FBtr0300428,FBtr0300429,FBtr0300430,FBtr0303562,FBtr0303563,FBtr0303564                                                                                                                         | 33663 | 14266 | 0            | 1,23858 |
| <b>RpL11</b>      | FBgn0013325 | FBtr0086533                                                                                                                                                                                                                                                             | 48731 | 20647 | 0            | 1,23891 |
| <b>Tfb1</b>       | FBgn0033929 | FBtr0305616                                                                                                                                                                                                                                                             | 687   | 291   | 3,72772E-23  | 1,23929 |
| <b>nej</b>        | FBgn0261617 | FBtr0302722,FBtr0302723,FBtr0071402                                                                                                                                                                                                                                     | 10966 | 4642  | 0            | 1,24022 |
| <b>RpL10Ab</b>    | FBgn0036213 | FBtr0076032,FBtr0304648                                                                                                                                                                                                                                                 | 4417  | 1869  | 6,02289E-145 | 1,24080 |
| <b>CG2310</b>     | FBgn0039665 | FBtr0085433,FBtr0085434                                                                                                                                                                                                                                                 | 4466  | 1889  | 8,77298E-147 | 1,24136 |
| <b>Tfb1</b>       | FBgn0033929 | FBtr0087548,FBtr0087549                                                                                                                                                                                                                                                 | 688   | 291   | 2,83518E-23  | 1,24139 |
| <b>skpA</b>       | FBgn0025637 | FBtr0070126                                                                                                                                                                                                                                                             | 1447  | 612   | 4,80097E-48  | 1,24146 |
| <b>CG11455</b>    | FBgn0031228 | FBtr0301888                                                                                                                                                                                                                                                             | 1328  | 581   | 3,06078E-44  | 1,24318 |
| <b>CG11876</b>    | FBgn0039635 | FBtr0085366,FBtr0085367,FBtr0085368,FBtr0085369                                                                                                                                                                                                                         | 635   | 268   | 1,33986E-21  | 1,24452 |
| <b>RpL8</b>       | FBgn0261602 | FBtr0072925                                                                                                                                                                                                                                                             | 1729  | 729   | 9,98643E-58  | 1,24595 |
| <b>Tim10</b>      | FBgn0027360 | FBtr0071677,FBtr0071676                                                                                                                                                                                                                                                 | 1089  | 459   | 1,22184E-36  | 1,24644 |
| <b>skpA</b>       | FBgn0025637 | FBtr0070127                                                                                                                                                                                                                                                             | 1468  | 618   | 2,73795E-49  | 1,24817 |
| <b>CR41602</b>    | FBgn0085813 | FBtr0114268                                                                                                                                                                                                                                                             | 10829 | 4558  | 0            | 1,24843 |
| <b>CG42574</b>    | FBgn0260794 | FBtr0303911,FBtr0303912,FBtr0303913,FBtr0303914,FBtr0303915,FBtr0303917,FBtr0301437                                                                                                                                                                                     | 2389  | 1004  | 5,06869E-80  | 1,25065 |
| <b>Mic2</b>       | FBgn0002773 | FBtr0089746                                                                                                                                                                                                                                                             | 538   | 226   | 1,18046E-18  | 1,25128 |
| <b>vsg</b>        | FBgn0045823 | FBtr0076398,FBtr0076400                                                                                                                                                                                                                                                 | 1576  | 662   | 4,29687E-53  | 1,25136 |
| <b>Pcd</b>        | FBgn0024841 | FBtr0085458                                                                                                                                                                                                                                                             | 1475  | 619   | 7,82159E-50  | 1,25270 |
| <b>CG7630</b>     | FBgn0040793 | FBtr0075217                                                                                                                                                                                                                                                             | 2295  | 962   | 1,99017E-77  | 1,25439 |
| <b>RpS9</b>       | FBgn0010408 | FBtr0076423,FBtr0076424                                                                                                                                                                                                                                                 | 16388 | 6868  | 0            | 1,25468 |
| <b>RpS9</b>       | FBgn0010408 | FBtr0076425                                                                                                                                                                                                                                                             | 16381 | 6861  | 0            | 1,25553 |
| <b>CG34417</b>    | FBgn0085446 | FBtr0112703                                                                                                                                                                                                                                                             | 4397  | 1839  | 2,34443E-148 | 1,25760 |
| <b>RpL8</b>       | FBgn0261602 | FBtr0072924                                                                                                                                                                                                                                                             | 1705  | 713   | 5,60524E-58  | 1,25780 |
| <b>RpS28b</b>     | FBgn0030136 | FBtr0071360                                                                                                                                                                                                                                                             | 50264 | 21009 | 0            | 1,25852 |
| <b>CG9027</b>     | FBgn0033631 | FBtr0089939,FBtr0089938,FBtr0110897                                                                                                                                                                                                                                     | 1494  | 624   | 5,13403E-51  | 1,25956 |
| <b>CG34383</b>    | FBgn0085412 | FBtr0112621,FBtr0112622,FBtr0112623,FBtr0112624,FBtr0290011                                                                                                                                                                                                             | 6391  | 2669  | 3,96959E-216 | 1,25974 |
| <b>Tfb1</b>       | FBgn0033929 | FBtr0087550                                                                                                                                                                                                                                                             | 731   | 305   | 2,04145E-25  | 1,26106 |
| <b>Cctgamma</b>   | FBgn0015019 | FBtr0083337,FBtr0302370,FBtr0302371                                                                                                                                                                                                                                     | 749   | 312   | 3,93723E-26  | 1,26342 |
| <b>cl</b>         | FBgn0000318 | FBtr0079095                                                                                                                                                                                                                                                             | 5171  | 2154  | 4,80201E-176 | 1,26343 |
| <b>CG1354</b>     | FBgn0030151 | FBtr0089384,FBtr0089385,FBtr0089383                                                                                                                                                                                                                                     | 1239  | 516   | 8,79730E-43  | 1,26373 |
| <b>scu</b>        | FBgn0021765 | FBtr0074511                                                                                                                                                                                                                                                             | 10494 | 4370  | 0            | 1,26386 |
| <b>CG7181</b>     | FBgn0037097 | FBtr0078382                                                                                                                                                                                                                                                             | 5258  | 2184  | 3,85754E-180 | 1,26754 |
| <b>CG42574</b>    | FBgn0260794 | FBtr0303916                                                                                                                                                                                                                                                             | 2503  | 1039  | 2,84960E-86  | 1,26846 |
| <b>CG7267</b>     | FBgn0030079 | FBtr0071354                                                                                                                                                                                                                                                             | 2912  | 1207  | 1,20782E-100 | 1,27058 |
| <b>CR40469</b>    | FBgn0058469 | FBtr0307364                                                                                                                                                                                                                                                             | 5465  | 2265  | 3,64451E-188 | 1,27071 |
| <b>Mic2</b>       | FBgn0002773 | FBtr0089747                                                                                                                                                                                                                                                             | 553   | 229   | 7,96628E-20  | 1,27193 |

|                  |             |                                                                                                                                                                                                             |        |       |              |         |
|------------------|-------------|-------------------------------------------------------------------------------------------------------------------------------------------------------------------------------------------------------------|--------|-------|--------------|---------|
| <b>pix</b>       | FBgn0086706 | FBtr0076558                                                                                                                                                                                                 | 1367   | 566   | 9,81140E-48  | 1,27214 |
| <b>Smr</b>       | FBgn0024308 | FBtr0073708                                                                                                                                                                                                 | 2197   | 909   | 2,01539E-76  | 1,27318 |
| <b>CG18809</b>   | FBgn0042132 | FBtr0074810,FBtr0074811                                                                                                                                                                                     | 1385   | 573   | 1,89890E-48  | 1,27328 |
| <b>mask</b>      | FBgn0043884 | FBtr0084562,FBtr0084563,FBtr0305043                                                                                                                                                                         | 32566  | 13467 | 0            | 1,27394 |
| <b>CG11455</b>   | FBgn0031228 | FBtr0301887                                                                                                                                                                                                 | 1317   | 544   | 2,96396E-46  | 1,27558 |
| <b>CG11455</b>   | FBgn0031228 | FBtr0078117,FBtr0306542                                                                                                                                                                                     | 1305   | 539   | 6,42800E-46  | 1,27569 |
| <b>mRpL17</b>    | FBgn0035122 | FBtr0072503                                                                                                                                                                                                 | 1087   | 448   | 1,41092E-38  | 1,27878 |
| <b>ox</b>        | FBgn0011227 | FBtr0087861                                                                                                                                                                                                 | 2029   | 835   | 1,87746E-71  | 1,28092 |
| <b>uif</b>       | FBgn0031879 | FBtr0079354,FBtr0307072,FBtr0307073,FBtr0307074,FBtr0290119,FBtr0302162                                                                                                                                     | 47563  | 19565 | 0            | 1,28156 |
| <b>RpS7</b>      | FBgn0039757 | FBtr0089424                                                                                                                                                                                                 | 59156  | 24301 | 0            | 1,28351 |
| <b>RpL34a</b>    | FBgn0039406 | FBtr0084972,FBtr0084973                                                                                                                                                                                     | 2207   | 904   | 1,49172E-78  | 1,28769 |
| <b>RpL34a</b>    | FBgn0039406 | FBtr0302369                                                                                                                                                                                                 | 2203   | 902   | 2,00494E-78  | 1,28827 |
| <b>RpL24</b>     | FBgn0032518 | FBtr0080524                                                                                                                                                                                                 | 42747  | 17445 | 0            | 1,29301 |
| <b>CG5938</b>    | FBgn0046247 | FBtr0085159,FBtr0085160                                                                                                                                                                                     | 761    | 310   | 5,73526E-28  | 1,29563 |
| <b>HERC2</b>     | FBgn0031107 | FBtr0301344                                                                                                                                                                                                 | 10192  | 4147  | 0            | 1,29730 |
| <b>CG13044</b>   | FBgn0036599 | FBtr0075470                                                                                                                                                                                                 | 537    | 1321  | 3,85383E-48  | 1,29864 |
| <b>capt</b>      | FBgn0261458 | FBtr0100022                                                                                                                                                                                                 | 1191   | 484   | 1,78304E-43  | 1,29909 |
| <b>Hsc70-4</b>   | FBgn0001219 | FBtr0083057                                                                                                                                                                                                 | 18800  | 7616  | 0            | 1,30363 |
| <b>spen</b>      | FBgn0016977 | FBtr0078122,FBtr0078121,FBtr0078123,FBtr0306341                                                                                                                                                             | 23146  | 9374  | 0            | 1,30403 |
| <b>hoip</b>      | FBgn0015393 | FBtr0079846                                                                                                                                                                                                 | 6828   | 2765  | 1,01545E-247 | 1,30418 |
| <b>LBR</b>       | FBgn0034657 | FBtr0071713                                                                                                                                                                                                 | 857    | 347   | 8,23581E-32  | 1,30436 |
| <b>Mi-2</b>      | FBgn0262519 | FBtr0100394                                                                                                                                                                                                 | 670    | 271   | 4,11576E-25  | 1,30587 |
| <b>Mi-2</b>      | FBgn0262519 | FBtr0074919,FBtr0302046                                                                                                                                                                                     | 670    | 271   | 4,11576E-25  | 1,30587 |
| <b>CG12384</b>   | FBgn0033624 | FBtr0088155                                                                                                                                                                                                 | 654    | 264   | 1,20926E-24  | 1,30875 |
| <b>CG32069</b>   | FBgn0052069 | FBtr0076241                                                                                                                                                                                                 | 825    | 333   | 9,46662E-31  | 1,30887 |
| <b>CG3214</b>    | FBgn0031436 | FBtr0077745,FBtr0273393                                                                                                                                                                                     | 1851   | 747   | 3,47361E-68  | 1,30912 |
| <b>CG17343</b>   | FBgn0032751 | FBtr0081151                                                                                                                                                                                                 | 1341   | 541   | 1,16381E-49  | 1,30961 |
| <b>B52</b>       | FBgn0004587 | FBtr0308196                                                                                                                                                                                                 | 522    | 210   | 6,38859E-20  | 1,31366 |
| <b>CR43334</b>   | FBgn0263039 | FBtr0306918                                                                                                                                                                                                 | 660    | 265   | 4,28974E-25  | 1,31647 |
| <b>sta</b>       | FBgn0003517 | FBtr0070289,FBtr0070290,FBtr0070291                                                                                                                                                                         | 94998  | 38139 | 0            | 1,31663 |
| <b>Nurf-38</b>   | FBgn0016687 | FBtr0273253                                                                                                                                                                                                 | 2233   | 896   | 3,60835E-83  | 1,31741 |
| <b>Nurf-38</b>   | FBgn0016687 | FBtr0072343                                                                                                                                                                                                 | 2233   | 896   | 3,60835E-83  | 1,31741 |
| <b>futsch</b>    | FBgn0259108 | FBtr0112628,FBtr0307597,FBtr0307598                                                                                                                                                                         | 481    | 193   | 1,54168E-18  | 1,31744 |
| <b>RpS20</b>     | FBgn0019936 | FBtr0083964                                                                                                                                                                                                 | 56978  | 22860 | 0            | 1,31758 |
| <b>Pcmt</b>      | FBgn0086768 | FBtr0078758                                                                                                                                                                                                 | 4031   | 1617  | 1,31060E-149 | 1,31782 |
| <b>LBR</b>       | FBgn0034657 | FBtr0071711,FBtr0071712                                                                                                                                                                                     | 833    | 334   | 1,40353E-31  | 1,31847 |
| <b>RpL34b</b>    | FBgn0037686 | FBtr0082049                                                                                                                                                                                                 | 6567   | 2633  | 1,36396E-243 | 1,31853 |
| <b>RpL34b</b>    | FBgn0037686 | FBtr0082050                                                                                                                                                                                                 | 6575   | 2634  | 2,68329E-244 | 1,31974 |
| <b>RpL8</b>      | FBgn0261602 | FBtr0072924,FBtr0072925                                                                                                                                                                                     | 76066  | 30467 | 0            | 1,32000 |
| <b>Ef2b</b>      | FBgn0000559 | FBtr0085911                                                                                                                                                                                                 | 10797  | 4304  | 0            | 1,32688 |
| <b>RpL37a</b>    | FBgn0030616 | FBtr0074027                                                                                                                                                                                                 | 76903  | 30634 | 0            | 1,32791 |
| <b>CG11151</b>   | FBgn0030519 | FBtr0073819                                                                                                                                                                                                 | 2418   | 963   | 1,88537E-91  | 1,32821 |
| <b>B52</b>       | FBgn0004587 | FBtr0082801,FBtr0082802,FBtr0082803,FBtr0300586,FBtr0300588,FBtr0300589,FBtr0308197                                                                                                                         | 543    | 216   | 3,29820E-21  | 1,32992 |
| <b>Hsp26</b>     | FBgn0001225 | FBtr0076496                                                                                                                                                                                                 | 17674  | 7030  | 0            | 1,33003 |
| <b>ATPsyn-d</b>  | FBgn0016120 | FBtr0083728                                                                                                                                                                                                 | 10108  | 4018  | 0            | 1,33095 |
| <b>B52</b>       | FBgn0004587 | FBtr0308195                                                                                                                                                                                                 | 544    | 216   | 2,45758E-21  | 1,33258 |
| <b>ATPsyn-d</b>  | FBgn0016120 | FBtr0083727                                                                                                                                                                                                 | 9926   | 3934  | 0            | 1,33522 |
| <b>CG13364</b>   | FBgn0026879 | FBtr0070159                                                                                                                                                                                                 | 3588   | 1418  | 1,50839E-137 | 1,33932 |
| <b>CG3625</b>    | FBgn0031245 | FBtr0078136                                                                                                                                                                                                 | 793    | 313   | 4,39624E-31  | 1,34116 |
| <b>Rack1</b>     | FBgn0020618 | FBtr0079565                                                                                                                                                                                                 | 139923 | 55225 | 0            | 1,34124 |
| <b>Smr</b>       | FBgn0024308 | FBtr0073707                                                                                                                                                                                                 | 2147   | 846   | 4,70490E-83  | 1,34359 |
| <b>RpS11</b>     | FBgn0033699 | FBtr0088006,FBtr0088007                                                                                                                                                                                     | 60034  | 23650 | 0            | 1,34394 |
| <b>CG14235</b>   | FBgn0031066 | FBtr0074815,FBtr0074816,FBtr0074817                                                                                                                                                                         | 960    | 378   | 1,07575E-37  | 1,34465 |
| <b>RpS15Ab</b>   | FBgn0033555 | FBtr0088226                                                                                                                                                                                                 | 34526  | 13574 | 0            | 1,34684 |
| <b>levy</b>      | FBgn0034877 | FBtr0072061                                                                                                                                                                                                 | 8802   | 3457  | 0            | 1,34831 |
| <b>RpS11</b>     | FBgn0033699 | FBtr0088007                                                                                                                                                                                                 | 13337  | 5237  | 0            | 1,34862 |
| <b>ft</b>        | FBgn0001075 | FBtr0077478                                                                                                                                                                                                 | 42317  | 16531 | 0            | 1,35606 |
| <b>RpS15</b>     | FBgn0034138 | FBtr0087123,FBtr0087124                                                                                                                                                                                     | 56637  | 22078 | 0            | 1,35914 |
| <b>Pdsw</b>      | FBgn0021967 | FBtr0077520,FBtr0077521                                                                                                                                                                                     | 3076   | 1199  | 1,51208E-121 | 1,35922 |
| <b>CG9350</b>    | FBgn0034576 | FBtr0071530                                                                                                                                                                                                 | 1489   | 578   | 1,08001E-59  | 1,36520 |
| <b>RpL37A</b>    | FBgn0261608 | FBtr0302570                                                                                                                                                                                                 | 25185  | 9765  | 0            | 1,36687 |
| <b>RpL35A</b>    | FBgn0037328 | FBtr0078769                                                                                                                                                                                                 | 28461  | 11033 | 0            | 1,36716 |
| <b>CG12935</b>   | FBgn0033547 | FBtr0088221                                                                                                                                                                                                 | 1659   | 643   | 1,05239E-66  | 1,36742 |
| <b>CG13926</b>   | FBgn0035243 | FBtr0072823                                                                                                                                                                                                 | 756    | 293   | 8,30855E-31  | 1,36749 |
| <b>CG4692</b>    | FBgn0035032 | FBtr0072339,FBtr0072340                                                                                                                                                                                     | 5360   | 2077  | 8,52063E-214 | 1,36773 |
| <b>CG5794</b>    | FBgn0039214 | FBtr0084667,FBtr0084668,FBtr0306172                                                                                                                                                                         | 7438   | 2874  | 2,76307E-285 | 1,37185 |
| <b>RpL37A</b>    | FBgn0261608 | FBtr0079017,FBtr0079016                                                                                                                                                                                     | 25102  | 9689  | 0            | 1,37338 |
| <b>Smr</b>       | FBgn0024308 | FBtr0073706                                                                                                                                                                                                 | 2125   | 820   | 6,36333E-86  | 1,37377 |
| <b>pix</b>       | FBgn0086706 | FBtr0076557                                                                                                                                                                                                 | 2243   | 865   | 1,05033E-90  | 1,37466 |
| <b>CG11455</b>   | FBgn0031228 | FBtr0301886                                                                                                                                                                                                 | 2288   | 882   | 1,30196E-92  | 1,37524 |
| <b>CG11455</b>   | FBgn0031228 | FBtr0078118                                                                                                                                                                                                 | 2349   | 904   | 2,28922E-95  | 1,37765 |
| <b>CG9205</b>    | FBgn0035181 | FBtr0072621,FBtr0072622                                                                                                                                                                                     | 1528   | 588   | 2,53988E-62  | 1,37776 |
| <b>CG42239</b>   | FBgn0250868 | FBtr0290307                                                                                                                                                                                                 | 1483   | 569   | 6,02045E-61  | 1,38202 |
| <b>CG3321</b>    | FBgn0038224 | FBtr0082931,FBtr0082932,FBtr0303795                                                                                                                                                                         | 5102   | 1931  | 1,30016E-213 | 1,40171 |
| <b>CG32038</b>   | FBgn0052038 | FBtr0076462                                                                                                                                                                                                 | 1185   | 448   | 2,61223E-50  | 1,40332 |
| <b>Sod</b>       | FBgn0003462 | FBtr0076229                                                                                                                                                                                                 | 16857  | 6364  | 0            | 1,40534 |
| <b>Ten-m</b>     | FBgn0004449 | FBtr0078509,FBtr0306107                                                                                                                                                                                     | 13753  | 5180  | 0            | 1,40872 |
| <b>RpL18A</b>    | FBgn0010409 | FBtr0086947                                                                                                                                                                                                 | 65888  | 24791 | 0            | 1,41020 |
| <b>RpL26</b>     | FBgn0036825 | FBtr0075066                                                                                                                                                                                                 | 56833  | 21381 | 0            | 1,41040 |
| <b>Oscp</b>      | FBgn0016691 | FBtr0083064                                                                                                                                                                                                 | 6231   | 2342  | 2,76402E-264 | 1,41172 |
| <b>RpL40</b>     | FBgn0003941 | FBtr0077470                                                                                                                                                                                                 | 60926  | 22857 | 0            | 1,41442 |
| <b>janA</b>      | FBgn0001280 | FBtr0085596                                                                                                                                                                                                 | 627    | 235   | 1,90738E-27  | 1,41580 |
| <b>CG10320</b>   | FBgn0034645 | FBtr0071663,FBtr0113101,FBtr0113102,FBtr0300679,FBtr0300680                                                                                                                                                 | 1061   | 397   | 5,90476E-46  | 1,41821 |
| <b>trol</b>      | FBgn0261451 | FBtr0091965,FBtr0305158,FBtr0305159,FBtr0305160,FBtr0305161,FBtr0305162,FBtr0305164,FBtr0305167,FBtr0305168,FBtr0305169,FBtr0305170,FBtr0305171,FBtr0305172,FBtr0305173,FBtr0305174,FBtr0305175,FBtr0305176 | 436    | 163   | 1,88709E-19  | 1,41946 |
| <b>l(1)G0230</b> | FBgn0028342 | FBtr0071438                                                                                                                                                                                                 | 8914   | 3325  | 0            | 1,42272 |
| <b>CG34242</b>   | FBgn0085271 | FBtr0300028                                                                                                                                                                                                 | 551    | 205   | 1,41524E-24  | 1,42643 |
| <b>Oscp</b>      | FBgn0016691 | FBtr0083063                                                                                                                                                                                                 | 7510   | 2791  | 2,2539E-310  | 1,42803 |
| <b>Rcd4</b>      | FBgn0032034 | FBtr0303472                                                                                                                                                                                                 | 526    | 195   | 1,15396E-23  | 1,43159 |

|                |             |                                                                                                                                                             |  |       |  |       |  |              |                |
|----------------|-------------|-------------------------------------------------------------------------------------------------------------------------------------------------------------|--|-------|--|-------|--|--------------|----------------|
| <b>CG8204</b>  | FBgn0034033 | FBtr0087349                                                                                                                                                 |  | 421   |  | 156   |  | 3,87958E-19  | <b>1,43227</b> |
| <b>Rcd4</b>    | FBgn0032034 | FBtr0079652                                                                                                                                                 |  | 535   |  | 198   |  | 3,96334E-24  | <b>1,43404</b> |
| <b>ldh</b>     | FBgn0001248 | FBtr0076667,FBtr0076668,FBtr0114548                                                                                                                         |  | 592   |  | 219   |  | 1,46466E-26  | <b>1,43467</b> |
| <b>RpS18</b>   | FBgn0010411 | FBtr0086273,FBtr0086274                                                                                                                                     |  | 69553 |  | 25697 |  | 0            | <b>1,43651</b> |
| <b>CG34242</b> | FBgn0085271 | FBtr0112436                                                                                                                                                 |  | 547   |  | 202   |  | 1,17639E-24  | <b>1,43719</b> |
| <b>CG8184</b>  | FBgn0030674 | FBtr0074082                                                                                                                                                 |  | 31112 |  | 11476 |  | 0            | <b>1,43885</b> |
| <b>primo-2</b> | FBgn0040076 | FBtr0091746                                                                                                                                                 |  | 510   |  | 188   |  | 3,20466E-23  | <b>1,43976</b> |
| <b>Cpr65Ec</b> | FBgn0035737 | FBtr0076909                                                                                                                                                 |  | 513   |  | 189   |  | 2,75162E-23  | <b>1,44057</b> |
| <b>kis</b>     | FBgn0086902 | FBtr0299837                                                                                                                                                 |  | 1781  |  | 654   |  | 1,50505E-79  | <b>1,44533</b> |
| <b>Dsp1</b>    | FBgn0011764 | FBtr0089260                                                                                                                                                 |  | 537   |  | 197   |  | 1,29357E-24  | <b>1,44673</b> |
| <b>CG42574</b> | FBgn0260794 | FBtr0303911,FBtr0303913,FBtr0303915,FBtr0303916,FBtr0301437                                                                                                 |  | 1483  |  | 544   |  | 2,20424E-66  | <b>1,44684</b> |
| <b>primo-1</b> | FBgn0040077 | FBtr0091747,FBtr0091748                                                                                                                                     |  | 510   |  | 187   |  | 1,95790E-23  | <b>1,44746</b> |
| <b>CG14184</b> | FBgn0036932 | FBtr0074872,FBtr0302366                                                                                                                                     |  | 1141  |  | 418   |  | 2,16274E-51  | <b>1,44872</b> |
| <b>Mgstl</b>   | FBgn0025814 | FBtr0077243                                                                                                                                                 |  | 1152  |  | 422   |  | 6,36610E-52  | <b>1,44883</b> |
| <b>CG31126</b> | FBgn0051126 | FBtr0084663                                                                                                                                                 |  | 604   |  | 221   |  | 1,19105E-27  | <b>1,45050</b> |
| <b>mRpS14</b>  | FBgn0044030 | FBtr0074785                                                                                                                                                 |  | 719   |  | 263   |  | 8,78820E-33  | <b>1,45093</b> |
| <b>ksh</b>     | FBgn0040890 | FBtr0300214                                                                                                                                                 |  | 798   |  | 291   |  | 1,76418E-36  | <b>1,45537</b> |
| <b>Msp-300</b> | FBgn0261836 | FBtr0303385,FBtr0303387,FBtr0303388,FBtr0303389                                                                                                             |  | 20374 |  | 7412  |  | 0            | <b>1,45879</b> |
| <b>CG12859</b> | FBgn0033961 | FBtr0087440                                                                                                                                                 |  | 1380  |  | 502   |  | 6,50361E-63  | <b>1,45891</b> |
| <b>CG42574</b> | FBgn0260794 | FBtr0303914                                                                                                                                                 |  | 851   |  | 308   |  | 1,71701E-39  | <b>1,46623</b> |
| <b>rhea</b>    | FBgn0260442 | FBtr0305210,FBtr0305211,FBtr0305212                                                                                                                         |  | 413   |  | 149   |  | 1,13874E-19  | <b>1,47083</b> |
| <b>RpL32</b>   | FBgn0002626 | FBtr0114555,FBtr0114556                                                                                                                                     |  | 48531 |  | 17501 |  | 0            | <b>1,47147</b> |
| <b>RpL32</b>   | FBgn0002626 | FBtr0085592,FBtr0085593,FBtr0085594                                                                                                                         |  | 48533 |  | 17501 |  | 0            | <b>1,47153</b> |
| <b>CG1607</b>  | FBgn0039844 | FBtr0085786                                                                                                                                                 |  | 527   |  | 190   |  | 7,11910E-25  | <b>1,47180</b> |
| <b>CG34306</b> | FBgn0085335 | FBtr0112502                                                                                                                                                 |  | 464   |  | 167   |  | 4,80272E-22  | <b>1,47428</b> |
| <b>Got2</b>    | FBgn0001125 | FBtr0077867                                                                                                                                                 |  | 717   |  | 258   |  | 1,00809E-33  | <b>1,47460</b> |
| <b>RpL35</b>   | FBgn0029785 | FBtr0070801                                                                                                                                                 |  | 8662  |  | 3106  |  | 0            | <b>1,47964</b> |
| <b>CoVa</b>    | FBgn0019624 | FBtr0082474                                                                                                                                                 |  | 8129  |  | 2914  |  | 0            | <b>1,48008</b> |
| <b>CG6543</b>  | FBgn0033879 | FBtr0087644                                                                                                                                                 |  | 603   |  | 216   |  | 9,88919E-29  | <b>1,48113</b> |
| <b>CG17508</b> | FBgn0039970 | FBtr0086071,FBtr0307172                                                                                                                                     |  | 394   |  | 141   |  | 4,94653E-19  | <b>1,48250</b> |
| <b>CG13053</b> | FBgn0040801 | FBtr0075480                                                                                                                                                 |  | 450   |  | 161   |  | 1,12352E-21  | <b>1,48286</b> |
|                |             | FBtr0113128                                                                                                                                                 |  | 797   |  | 285   |  | 8,65983E-38  | <b>1,48362</b> |
| <b>CG7414</b>  | FBgn0037135 | FBtr0303246,FBtr0303247                                                                                                                                     |  | 1183  |  | 423   |  | 9,38629E-56  | <b>1,48372</b> |
| <b>RpL18</b>   | FBgn0035753 | FBtr0076892                                                                                                                                                 |  | 57566 |  | 20582 |  | 0            | <b>1,48383</b> |
| <b>CG7414</b>  | FBgn0037135 | FBtr0078441,FBtr0303245                                                                                                                                     |  | 1185  |  | 423   |  | 4,92643E-56  | <b>1,48616</b> |
| <b>CG9065</b>  | FBgn0030610 | FBtr0073966                                                                                                                                                 |  | 580   |  | 207   |  | 9,49841E-28  | <b>1,48642</b> |
| <b>RpL7A</b>   | FBgn0014026 | FBtr0070915                                                                                                                                                 |  | 398   |  | 142   |  | 2,24666E-19  | <b>1,48688</b> |
| <b>CG34417</b> | FBgn0085446 | FBtr0112703,FBtr0112704,FBtr0112706,FBtr0112707,FBtr0303205,FBtr0303206,FBtr0301323,FBtr0301324                                                             |  | 656   |  | 234   |  | 2,14424E-31  | <b>1,48719</b> |
| <b>CG13551</b> | FBgn0040660 | FBtr0072035                                                                                                                                                 |  | 953   |  | 339   |  | 1,68022E-45  | <b>1,49119</b> |
| <b>RpL28</b>   | FBgn0035422 | FBtr0073095,FBtr0073097,FBtr0073098,FBtr0302300,FBtr0302301,FBtr0306567                                                                                     |  | 64655 |  | 22974 |  | 0            | <b>1,49276</b> |
| <b>CG13551</b> | FBgn0040660 | FBtr0072033,FBtr0072034                                                                                                                                     |  | 949   |  | 337   |  | 2,23387E-45  | <b>1,49366</b> |
| <b>janA</b>    | FBgn0001280 | FBtr0085595,FBtr0085597                                                                                                                                     |  | 597   |  | 212   |  | 6,59566E-29  | <b>1,49367</b> |
| <b>CoVa</b>    | FBgn0019624 | FBtr0082473                                                                                                                                                 |  | 8026  |  | 2850  |  | 0            | <b>1,49372</b> |
| <b>glo</b>     | FBgn0259139 | FBtr0089918,FBtr0089919                                                                                                                                     |  | 372   |  | 132   |  | 2,45200E-18  | <b>1,49476</b> |
| <b>Mgstl</b>   | FBgn0025814 | FBtr0077242,FBtr0077243                                                                                                                                     |  | 1239  |  | 439   |  | 2,71972E-59  | <b>1,49688</b> |
| <b>Ten-a</b>   | FBgn0259240 | FBtr0300202,FBtr0300203,FBtr0300204,FBtr0299858,FBtr0299859,FBtr0299860,FBtr0308221,FBtr0308222,FBtr0308223                                                 |  | 466   |  | 165   |  | 9,16055E-23  | <b>1,49786</b> |
| <b>RpS14a</b>  | FBgn0004403 | FBtr0071095                                                                                                                                                 |  | 15929 |  | 5603  |  | 0            | <b>1,50738</b> |
| <b>CG14104</b> | FBgn0040786 | FBtr0299563                                                                                                                                                 |  | 966   |  | 339   |  | 3,25808E-47  | <b>1,51074</b> |
| <b>CG14566</b> | FBgn0037127 | FBtr0078453                                                                                                                                                 |  | 1199  |  | 419   |  | 8,61389E-59  | <b>1,51681</b> |
|                |             | FBtr0091745                                                                                                                                                 |  | 459   |  | 160   |  | 4,98359E-23  | <b>1,52042</b> |
|                |             | FBtr0091749                                                                                                                                                 |  | 459   |  | 160   |  | 4,98359E-23  | <b>1,52042</b> |
| <b>CG14997</b> | FBgn0035515 | FBtr0073225                                                                                                                                                 |  | 465   |  | 162   |  | 1,92081E-23  | <b>1,52124</b> |
| <b>Doa</b>     | FBgn0259220 | FBtr0299747                                                                                                                                                 |  | 833   |  | 290   |  | 2,23775E-41  | <b>1,52226</b> |
| <b>dikar</b>   | FBgn0261934 | FBtr0303751                                                                                                                                                 |  | 948   |  | 330   |  | 5,88637E-47  | <b>1,52242</b> |
| <b>kek5</b>    | FBgn0031016 | FBtr0074707                                                                                                                                                 |  | 839   |  | 292   |  | 1,22891E-41  | <b>1,52270</b> |
| <b>mRpL52</b>  | FBgn0033208 | FBtr0088942                                                                                                                                                 |  | 1057  |  | 367   |  | 1,71659E-52  | <b>1,52612</b> |
| <b>RpS14a</b>  | FBgn0004403 | FBtr0071094                                                                                                                                                 |  | 15835 |  | 5493  |  | 0            | <b>1,52745</b> |
| <b>Hsp60</b>   | FBgn0015245 | FBtr0073434                                                                                                                                                 |  | 2133  |  | 739   |  | 1,22739E-105 | <b>1,52924</b> |
| <b>mask</b>    | FBgn0043884 | FBtr0305043                                                                                                                                                 |  | 3551  |  | 1230  |  | 1,62207E-175 | <b>1,52957</b> |
| <b>mask</b>    | FBgn0043884 | FBtr0084562,FBtr0084563                                                                                                                                     |  | 3549  |  | 1227  |  | 4,65767E-176 | <b>1,53228</b> |
| <b>CR40502</b> | FBgn0085737 | FBtr0114187                                                                                                                                                 |  | 1563  |  | 540   |  | 6,62857E-78  | <b>1,53329</b> |
| <b>Cpr78E</b>  | FBgn0037114 | FBtr0078463                                                                                                                                                 |  | 597   |  | 206   |  | 2,91016E-30  | <b>1,53509</b> |
| <b>vnc</b>     | FBgn0263251 | FBtr0076348,FBtr0076350,FBtr0076349                                                                                                                         |  | 584   |  | 201   |  | 7,93250E-30  | <b>1,53877</b> |
| <b>CG42455</b> | FBgn0259932 | FBtr0300238,FBtr0300239                                                                                                                                     |  | 584   |  | 201   |  | 7,93250E-30  | <b>1,53877</b> |
| <b>CG14997</b> | FBgn0035515 | FBtr0073226                                                                                                                                                 |  | 462   |  | 159   |  | 1,08224E-23  | <b>1,53887</b> |
| <b>RpS7</b>    | FBgn0039757 | FBtr0089423                                                                                                                                                 |  | 5880  |  | 2021  |  | 3,32251E-294 | <b>1,54075</b> |
| <b>CG11752</b> | FBgn0030292 | FBtr0073452                                                                                                                                                 |  | 1532  |  | 526   |  | 3,15868E-77  | <b>1,54228</b> |
| <b>CG6543</b>  | FBgn0033879 | FBtr0087643                                                                                                                                                 |  | 648   |  | 222   |  | 2,94334E-33  | <b>1,54543</b> |
| <b>kis</b>     | FBgn0086902 | FBtr0078144                                                                                                                                                 |  | 764   |  | 261   |  | 3,26085E-39  | <b>1,54952</b> |
| <b>RpL13A</b>  | FBgn0037351 | FBtr0078705                                                                                                                                                 |  | 71431 |  | 24399 |  | 0            | <b>1,54973</b> |
| <b>RpL36A</b>  | FBgn0031980 | FBtr0079546                                                                                                                                                 |  | 48536 |  | 16561 |  | 0            | <b>1,55127</b> |
| <b>Vha68-2</b> | FBgn0020367 | FBtr0080418                                                                                                                                                 |  | 985   |  | 336   |  | 1,64027E-50  | <b>1,55166</b> |
| <b>mamo</b>    | FBgn0263115 | FBtr0112554,FBtr0307299,FBtr0307298,FBtr0112555,FBtr0303571                                                                                                 |  | 660   |  | 225   |  | 3,65954E-34  | <b>1,55254</b> |
| <b>CG9669</b>  | FBgn0036667 | FBtr0075339                                                                                                                                                 |  | 494   |  | 168   |  | 7,76434E-26  | <b>1,55605</b> |
| <b>CG9669</b>  | FBgn0036667 | FBtr0305272                                                                                                                                                 |  | 494   |  | 168   |  | 7,76434E-26  | <b>1,55605</b> |
| <b>RpS7</b>    | FBgn0039757 | FBtr0089424,FBtr0089425,FBtr0089422                                                                                                                         |  | 5715  |  | 1937  |  | 6,11376E-293 | <b>1,56093</b> |
| <b>CG42238</b> | FBgn0250867 | FBtr0290305                                                                                                                                                 |  | 828   |  | 280   |  | 2,90338E-43  | <b>1,56420</b> |
| <b>RpS26</b>   | FBgn0261597 | FBtr0081091                                                                                                                                                 |  | 74875 |  | 25311 |  | 0            | <b>1,56472</b> |
| <b>RpS26</b>   | FBgn0261597 | FBtr0081090                                                                                                                                                 |  | 74866 |  | 25308 |  | 0            | <b>1,56472</b> |
| <b>RpS26</b>   | FBgn0261597 | FBtr0081089                                                                                                                                                 |  | 74866 |  | 25308 |  | 0            | <b>1,56472</b> |
| <b>trol</b>    | FBgn0261451 | FBtr0305158,FBtr0305159,FBtr0305160,FBtr0305161,FBtr0305167,FBtr0305168,FBtr0305169,FBtr0305170,FBtr0305171,FBtr0305172,FBtr0305173,FBtr0305174,FBtr0305175 |  | 738   |  | 249   |  | 1,18581E-38  | <b>1,56748</b> |
| <b>Vha68-2</b> | FBgn0020367 | FBtr0080419                                                                                                                                                 |  | 983   |  | 331   |  | 1,52864E-51  | <b>1,57036</b> |
| <b>kek5</b>    | FBgn0031016 | FBtr0074708                                                                                                                                                 |  | 823   |  | 277   |  | 3,04931E-43  | <b>1,57101</b> |
| <b>CR33222</b> | FBgn0053222 | FBtr0300652                                                                                                                                                 |  | 3218  |  | 1083  |  | 3,68146E-167 | <b>1,57113</b> |
| <b>CG42574</b> | FBgn0260794 | FBtr0303912,FBtr0303915,FBtr0301437                                                                                                                         |  | 2196  |  | 739   |  | 2,63352E-114 | <b>1,57123</b> |
| <b>CG42574</b> | FBgn0260794 | FBtr0303913                                                                                                                                                 |  | 2197  |  | 739   |  | 1,87443E-114 | <b>1,57189</b> |

|                   |             |                                                                                                                                                 |       |       |              |                |
|-------------------|-------------|-------------------------------------------------------------------------------------------------------------------------------------------------|-------|-------|--------------|----------------|
| <b>CG42574</b>    | FBgn0260794 | FBtr0303911,FBtr0303914,FBtr0303916,FBtr0303917                                                                                                 | 2210  | 742   | 1,63127E-115 | <b>1,57456</b> |
| <b>Cpr49Ag</b>    | FBgn0033730 | FBtr0087922                                                                                                                                     | 1193  | 400   | 8,48189E-63  | <b>1,57652</b> |
| <b>CG5527</b>     | FBgn0039564 | FBtr0085255                                                                                                                                     | 472   | 158   | 2,10920E-25  | <b>1,57886</b> |
| <b>Not1</b>       | FBgn0085436 | FBtr0112674                                                                                                                                     | 398   | 133   | 1,35884E-21  | <b>1,58134</b> |
| <b>CG13319</b>    | FBgn0033781 | FBtr0087788                                                                                                                                     | 1208  | 403   | 3,72812E-64  | <b>1,58377</b> |
| <b>CG13319</b>    | FBgn0033781 | FBtr0300890                                                                                                                                     | 1208  | 403   | 3,72812E-64  | <b>1,58377</b> |
| <b>pncr002:3R</b> | FBgn0063127 | FBtr0091948                                                                                                                                     | 2537  | 845   | 2,92109E-134 | <b>1,58610</b> |
| <b>CG15523</b>    | FBgn0039727 | FBtr0085505,FBtr0300825                                                                                                                         | 401   | 133   | 4,87925E-22  | <b>1,59218</b> |
| <b>Bets</b>       | FBgn0260860 | FBtr0085570                                                                                                                                     | 766   | 254   | 2,49300E-41  | <b>1,59252</b> |
| <b>Cyt-b5</b>     | FBgn0033189 | FBtr0088905                                                                                                                                     | 1065  | 353   | 4,06283E-57  | <b>1,59311</b> |
| <b>RpL17</b>      | FBgn0029897 | FBtr0070980                                                                                                                                     | 341   | 113   | 8,26233E-19  | <b>1,59345</b> |
| <b>CG11455</b>    | FBgn0031228 | FBtr0078117,FBtr0301887,FBtr0301888                                                                                                             | 1007  | 333   | 2,41441E-54  | <b>1,59647</b> |
| <b>RpL7A</b>      | FBgn0014026 | FBtr0070916                                                                                                                                     | 487   | 161   | 1,30023E-26  | <b>1,59686</b> |
| <b>RpL35</b>      | FBgn0029785 | FBtr0070800,FBtr0070801                                                                                                                         | 57876 | 19116 | 0            | <b>1,59818</b> |
| <b>Hsp68</b>      | FBgn0001230 | FBtr0084589                                                                                                                                     | 3477  | 1148  | 2,74089E-186 | <b>1,59872</b> |
| <b>CR12628</b>    | FBgn0042701 | FBtr0085952                                                                                                                                     | 1099  | 362   | 1,37283E-59  | <b>1,60213</b> |
| <b>RpS18</b>      | FBgn0010411 | FBtr0086273                                                                                                                                     | 854   | 281   | 1,31080E-46  | <b>1,60367</b> |
| <b>CG9775</b>     | FBgn0037261 | FBtr0301297,FBtr0078894                                                                                                                         | 942   | 308   | 9,81866E-52  | <b>1,61280</b> |
| <b>CG4692</b>     | FBgn0035032 | FBtr0072340                                                                                                                                     | 1640  | 536   | 1,00487E-89  | <b>1,61339</b> |
| <b>trx</b>        | FBgn0003862 | FBtr0082950,FBtr0082947                                                                                                                         | 872   | 284   | 2,71852E-48  | <b>1,61844</b> |
| <b>rg</b>         | FBgn0086911 | FBtr0110993,FBtr0290088,FBtr0299589                                                                                                             | 348   | 113   | 7,26088E-20  | <b>1,62276</b> |
| <b>RpL36</b>      | FBgn0002579 | FBtr0070155                                                                                                                                     | 1419  | 460   | 1,11182E-78  | <b>1,62517</b> |
| <b>CG14482</b>    | FBgn0034245 | FBtr0086905                                                                                                                                     | 2548  | 824   | 2,92025E-141 | <b>1,62865</b> |
| <b>Megalin</b>    | FBgn0261260 | FBtr0302153                                                                                                                                     | 15429 | 4974  | 0            | <b>1,63317</b> |
| <b>RpS14b</b>     | FBgn0004404 | FBtr0071096                                                                                                                                     | 21107 | 6788  | 0            | <b>1,63666</b> |
| <b>eIF-3p40</b>   | FBgn0022023 | FBtr0079030                                                                                                                                     | 3068  | 986   | 1,04374E-171 | <b>1,63764</b> |
| <b>CG12848</b>    | FBgn0040666 | FBtr0072437                                                                                                                                     | 582   | 187   | 3,26108E-33  | <b>1,63798</b> |
| <b>CG30415</b>    | FBgn0250838 | FBtr0072031                                                                                                                                     | 1767  | 565   | 4,92965E-100 | <b>1,64498</b> |
| <b>RpL17</b>      | FBgn0029897 | FBtr0070982                                                                                                                                     | 830   | 265   | 2,06949E-47  | <b>1,64712</b> |
| <b>CG4692</b>     | FBgn0035032 | FBtr0072339                                                                                                                                     | 1511  | 481   | 4,08546E-86  | <b>1,65139</b> |
| <b>tweek</b>      | FBgn0261671 | FBtr0304928,FBtr0304929                                                                                                                         | 645   | 205   | 2,93590E-37  | <b>1,65368</b> |
| <b>tweek</b>      | FBgn0261671 | FBtr0304927,FBtr0304930                                                                                                                         | 642   | 204   | 3,34417E-37  | <b>1,65400</b> |
| <b>RpL36</b>      | FBgn0002579 | FBtr0070158                                                                                                                                     | 2636  | 837   | 1,92276E-150 | <b>1,65505</b> |
| <b>RpS18</b>      | FBgn0010411 | FBtr0086274                                                                                                                                     | 950   | 300   | 3,86823E-55  | <b>1,66297</b> |
| <b>RpL36</b>      | FBgn0002579 | FBtr0070156                                                                                                                                     | 2678  | 845   | 2,79763E-154 | <b>1,66413</b> |
| <b>btsz</b>       | FBgn0053555 | FBtr0091530,FBtr0273200,FBtr0306612                                                                                                             | 2799  | 883   | 2,93476E-161 | <b>1,66443</b> |
| <b>CG2310</b>     | FBgn0039665 | FBtr0085433                                                                                                                                     | 419   | 132   | 7,07603E-25  | <b>1,66641</b> |
| <b>CG30415</b>    | FBgn0250838 | FBtr0072030                                                                                                                                     | 1706  | 534   | 8,45147E-100 | <b>1,67571</b> |
| <b>RpL36</b>      | FBgn0002579 | FBtr0070157                                                                                                                                     | 2645  | 825   | 4,07556E-155 | <b>1,68080</b> |
| <b>RpS6</b>       | FBgn0261592 | FBtr0071135                                                                                                                                     | 19764 | 6147  | 0            | <b>1,68492</b> |
| <b>brat</b>       | FBgn0010300 | FBtr0081159                                                                                                                                     | 647   | 201   | 9,19244E-39  | <b>1,68657</b> |
| <b>RpS6</b>       | FBgn0261592 | FBtr0071136                                                                                                                                     | 19557 | 6034  | 0            | <b>1,69650</b> |
| <b>Mical</b>      | FBgn0053208 | FBtr0082213                                                                                                                                     | 1141  | 352   | 2,58563E-68  | <b>1,69665</b> |
| <b>Mical</b>      | FBgn0053208 | FBtr0082210,FBtr0082211,FBtr0082212,FBtr0082206,FBtr0082207,FBtr0082208,FBtr0082209,FBtr0273185,FBtr0306607,FBtr0306608,FBtr0306609,FBtr0306610 | 1141  | 352   | 2,58563E-68  | <b>1,69665</b> |
| <b>Abi</b>        | FBgn0020510 | FBtr0082910,FBtr0307077                                                                                                                         | 308   | 95    | 4,57949E-19  | <b>1,69693</b> |
| <b>sun</b>        | FBgn0014391 | FBtr0074176,FBtr0074177                                                                                                                         | 7933  | 2444  | 0            | <b>1,69862</b> |
| <b>RpL17</b>      | FBgn0029897 | FBtr0070980,FBtr0070981,FBtr0070982,FBtr0070983                                                                                                 | 69258 | 21266 | 0            | <b>1,70343</b> |
| <b>eIF-3p40</b>   | FBgn0022023 | FBtr0079031                                                                                                                                     | 2926  | 891   | 9,29318E-178 | <b>1,71543</b> |
| <b>RpL12</b>      | FBgn0034968 | FBtr0072175,FBtr0072174                                                                                                                         | 8791  | 2676  | 0            | <b>1,71595</b> |
| <b>Obp99a</b>     | FBgn0039678 | FBtr0085450                                                                                                                                     | 337   | 102   | 2,56603E-21  | <b>1,72418</b> |
| <b>RpS13</b>      | FBgn0010265 | FBtr0079724                                                                                                                                     | 1540  | 466   | 1,21993E-94  | <b>1,72453</b> |
| <b>RpS13</b>      | FBgn0010265 | FBtr0100541                                                                                                                                     | 1540  | 466   | 1,21993E-94  | <b>1,72453</b> |
| <b>CG11943</b>    | FBgn0031078 | FBtr0074798                                                                                                                                     | 526   | 159   | 7,21940E-33  | <b>1,72604</b> |
| <b>CG11943</b>    | FBgn0031078 | FBtr0074799                                                                                                                                     | 526   | 159   | 7,21940E-33  | <b>1,72604</b> |
| <b>CG13393</b>    | FBgn0032035 | FBtr0079719                                                                                                                                     | 4746  | 1434  | 3,55532E-291 | <b>1,72667</b> |
| <b>dikar</b>      | FBgn0261934 | FBtr0303748,FBtr0303751                                                                                                                         | 414   | 125   | 4,19100E-26  | <b>1,72770</b> |
| <b>RpL12</b>      | FBgn0034968 | FBtr0072176                                                                                                                                     | 8813  | 2652  | 0            | <b>1,73255</b> |
| <b>CG1753</b>     | FBgn0031148 | FBtr0077244                                                                                                                                     | 326   | 98    | 8,37932E-21  | <b>1,73402</b> |
| <b>Vha100-2</b>   | FBgn0028670 | FBtr0083656                                                                                                                                     | 291   | 87    | 7,80707E-19  | <b>1,74193</b> |
| <b>CG14057</b>    | FBgn0036696 | FBtr0075286                                                                                                                                     | 292   | 87    | 5,39415E-19  | <b>1,74688</b> |
| <b>CG14057</b>    | FBgn0036696 | FBtr0300718                                                                                                                                     | 293   | 87    | 3,74343E-19  | <b>1,75181</b> |
| <b>RpS17</b>      | FBgn0005533 | FBtr0076479                                                                                                                                     | 37720 | 11037 | 0            | <b>1,77298</b> |
| <b>Hsp70Aa</b>    | FBgn0013275 | FBtr0082512                                                                                                                                     | 7048  | 2041  | 0            | <b>1,78794</b> |
| <b>RpS21</b>      | FBgn0015521 | FBtr0273293                                                                                                                                     | 28457 | 8236  | 0            | <b>1,78877</b> |
| <b>Hsp70Ab</b>    | FBgn0013276 | FBtr0082482                                                                                                                                     | 7268  | 2096  | 0            | <b>1,79392</b> |
| <b>RpL41</b>      | FBgn0066084 | FBtr0100231                                                                                                                                     | 88787 | 25328 | 0            | <b>1,80962</b> |
| <b>CG9336</b>     | FBgn0032897 | FBtr0081427,FBtr0307498                                                                                                                         | 348   | 99    | 6,16860E-24  | <b>1,81359</b> |
| <b>CG42497</b>    | FBgn0260223 | FBtr0300626                                                                                                                                     | 4208  | 1191  | 1,10687E-282 | <b>1,82096</b> |
| <b>RpS12</b>      | FBgn0260441 | FBtr0075878                                                                                                                                     | 48860 | 13793 | 0            | <b>1,82472</b> |
| <b>CR41583</b>    | FBgn0085805 | FBtr0114259                                                                                                                                     | 267   | 75    | 8,61536E-19  | <b>1,83188</b> |
| <b>CG3214</b>     | FBgn0031436 | FBtr0273393                                                                                                                                     | 924   | 259   | 2,12054E-63  | <b>1,83494</b> |
| <b>CG2310</b>     | FBgn0039665 | FBtr0085434                                                                                                                                     | 622   | 174   | 4,76114E-43  | <b>1,83783</b> |
| <b>fd68A</b>      | FBgn0036134 | FBtr0300783,FBtr0301967                                                                                                                         | 401   | 112   | 5,68224E-28  | <b>1,84010</b> |
| <b>sls</b>        | FBgn0086906 | FBtr0072848,FBtr0072849                                                                                                                         | 4029  | 1125  | 1,22380E-275 | <b>1,84050</b> |
| <b>RpS21</b>      | FBgn0015521 | FBtr0077621,FBtr0077623                                                                                                                         | 27931 | 7783  | 0            | <b>1,84347</b> |
| <b>Vha44</b>      | FBgn0262511 | FBtr0290032,FBtr0087173                                                                                                                         | 318   | 88    | 1,15506E-22  | <b>1,85345</b> |
| <b>cher</b>       | FBgn0014141 | FBtr0089471,FBtr0290014                                                                                                                         | 731   | 202   | 3,20752E-51  | <b>1,85552</b> |
| <b>RpS8</b>       | FBgn0039713 | FBtr0085489,FBtr0306645                                                                                                                         | 98829 | 27184 | 0            | <b>1,86218</b> |
| <b>Tom7</b>       | FBgn0033357 | FBtr0088657                                                                                                                                     | 6086  | 1661  | 0            | <b>1,87344</b> |
| <b>Wnk</b>        | FBgn0037098 | FBtr0305329                                                                                                                                     | 323   | 88    | 1,67089E-23  | <b>1,87596</b> |
| <b>CG3214</b>     | FBgn0031436 | FBtr0077745                                                                                                                                     | 997   | 271   | 5,86287E-71  | <b>1,87930</b> |
| <b>RpL17</b>      | FBgn0029897 | FBtr0070981                                                                                                                                     | 736   | 200   | 1,13119E-52  | <b>1,87971</b> |
| <b>Wnk</b>        | FBgn0037098 | FBtr0305328                                                                                                                                     | 324   | 88    | 1,13741E-23  | <b>1,88042</b> |
| <b>rno</b>        | FBgn0035106 | FBtr0072532,FBtr0305548,FBtr0305549                                                                                                             | 1243  | 336   | 4,60125E-89  | <b>1,88729</b> |
| <b>RpS23</b>      | FBgn0033912 | FBtr0087575                                                                                                                                     | 62416 | 16835 | 0            | <b>1,89045</b> |
| <b>CG16936</b>    | FBgn0027590 | FBtr0305309                                                                                                                                     | 670   | 180   | 1,04143E-48  | <b>1,89616</b> |
| <b>nej</b>        | FBgn0261617 | FBtr0302722                                                                                                                                     | 7300  | 1956  | 0            | <b>1,89999</b> |
| <b>nej</b>        | FBgn0261617 | FBtr0302723,FBtr0071402                                                                                                                         | 7300  | 1955  | 0            | <b>1,90073</b> |
| <b>RpS30</b>      | FBgn0038834 | FBtr0083969                                                                                                                                     | 1653  | 442   | 8,53087E-120 | <b>1,90297</b> |
| <b>CG16936</b>    | FBgn0027590 | FBtr0072436                                                                                                                                     | 653   | 174   | 5,50887E-48  | <b>1,90800</b> |
| <b>CG1969</b>     | FBgn0039690 | FBtr0085475,FBtr0306104                                                                                                                         | 418   | 111   | 5,41749E-31  | <b>1,91294</b> |
| <b>Wnk</b>        | FBgn0037098 | FBtr0305330                                                                                                                                     | 279   | 74    | 6,00346E-21  | <b>1,91467</b> |
| <b>l(2)35Di</b>   | FBgn0001989 | FBtr0080771,FBtr0080772                                                                                                                         | 2673  | 702   | 1,27392E-197 | <b>1,92892</b> |

|                      |             |                                                                                                                                                                                                                                                 |        |       |              |         |
|----------------------|-------------|-------------------------------------------------------------------------------------------------------------------------------------------------------------------------------------------------------------------------------------------------|--------|-------|--------------|---------|
| <b>primo-1</b>       | FBgn0040077 | FBtr0091748                                                                                                                                                                                                                                     | 332    | 87    | 3,45493E-25  | 1,93210 |
| <b>primo-1</b>       | FBgn0040077 | FBtr0091747,FBtr0091749                                                                                                                                                                                                                         | 332    | 87    | 3,45493E-25  | 1,93210 |
|                      |             | FBtr0091745,FBtr0091746                                                                                                                                                                                                                         | 332    | 87    | 3,45493E-25  | 1,93210 |
| <b>dikar</b>         | FBgn0261934 | FBtr0303748,FBtr0303749,FBtr0303750,FBtr0303751                                                                                                                                                                                                 | 626    | 164   | 5,75895E-47  | 1,93247 |
| <b>CG10320</b>       | FBgn0034645 | FBtr0300679,FBtr0300680                                                                                                                                                                                                                         | 532    | 139   | 4,55073E-40  | 1,93634 |
| <b>CG10320</b>       | FBgn0034645 | FBtr0113101,FBtr0113102                                                                                                                                                                                                                         | 532    | 139   | 4,55073E-40  | 1,93634 |
| <b>sta</b>           | FBgn0003517 | FBtr0070291                                                                                                                                                                                                                                     | 51560  | 13449 | 0            | 1,93875 |
| <b>CG1746</b>        | FBgn0039830 | FBtr0085774,FBtr0306237                                                                                                                                                                                                                         | 3190   | 832   | 1,05288E-237 | 1,93890 |
| <b>CG10320</b>       | FBgn0034645 | FBtr0071663                                                                                                                                                                                                                                     | 533    | 139   | 3,03553E-40  | 1,93905 |
| <b>sta</b>           | FBgn0003517 | FBtr0070289,FBtr0070290                                                                                                                                                                                                                         | 51484  | 13414 | 0            | 1,94038 |
| <b>CG1746</b>        | FBgn0039830 | FBtr0085772,FBtr0085773,FBtr0305120,FBtr0305121                                                                                                                                                                                                 | 3190   | 830   | 1,65127E-238 | 1,94237 |
| <b>RpL17</b>         | FBgn0029897 | FBtr0070983                                                                                                                                                                                                                                     | 711    | 184   | 4,89507E-54  | 1,95014 |
| <b>CG17776</b>       | FBgn0040899 | FBtr0070390                                                                                                                                                                                                                                     | 1774   | 458   | 4,45333E-134 | 1,95359 |
| <b>RpS10b</b>        | FBgn0261593 | FBtr0308192                                                                                                                                                                                                                                     | 6988   | 1792  | 0            | 1,96331 |
| <b>trol</b>          | FBgn0261451 | FBtr0305158,FBtr0305159,FBtr0305160,FBtr0305161,FBtr0305163,FBtr0305167,FBtr0305168,FBtr0305169,FBtr0305170,FBtr0305171,FBtr0305172,FBtr0305173,FBtr0305174,FBtr0305175                                                                         | 623    | 159   | 3,24932E-48  | 1,97021 |
| <b>RpS10b</b>        | FBgn0261593 | FBtr0074731,FBtr0074732                                                                                                                                                                                                                         | 6946   | 1765  | 0            | 1,97651 |
| <b>NP15.6</b>        | FBgn0027785 | FBtr0083712                                                                                                                                                                                                                                     | 4754   | 1205  | 0            | 1,98011 |
| <b>rg</b>            | FBgn0086911 | FBtr0070745,FBtr0110993,FBtr0290088,FBtr0299588                                                                                                                                                                                                 | 401    | 101   | 9,47462E-32  | 1,98925 |
| <b>CG2021</b>        | FBgn0035271 | FBtr0072791                                                                                                                                                                                                                                     | 1284   | 322   | 1,52835E-100 | 1,99551 |
| <b>stan</b>          | FBgn0024836 | FBtr0303223,FBtr0304899,FBtr0304900                                                                                                                                                                                                             | 1879   | 471   | 5,13918E-147 | 1,99617 |
| <b>CR41540</b>       | FBgn0085797 | FBtr0114251                                                                                                                                                                                                                                     | 773    | 193   | 5,34087E-61  | 2,00187 |
| <b>brm</b>           | FBgn0000212 | FBtr0075525                                                                                                                                                                                                                                     | 239    | 59    | 1,22731E-19  | 2,01822 |
| <b>RpS30</b>         | FBgn0038834 | FBtr0083970                                                                                                                                                                                                                                     | 1607   | 394   | 5,17838E-129 | 2,02810 |
| <b>RpLP1</b>         | FBgn0002593 | FBtr0078056                                                                                                                                                                                                                                     | 84340  | 20638 | 0            | 2,03091 |
| <b>LBR</b>           | FBgn0034657 | FBtr0071711                                                                                                                                                                                                                                     | 224    | 54    | 5,57374E-19  | 2,05247 |
| <b>CG7834</b>        | FBgn0039697 | FBtr0085536                                                                                                                                                                                                                                     | 646    | 155   | 1,70738E-53  | 2,05927 |
| <b>CG7834</b>        | FBgn0039697 | FBtr0085535                                                                                                                                                                                                                                     | 661    | 158   | 8,23674E-55  | 2,06473 |
| <b>Mhc</b>           | FBgn0086783 | FBtr0080895,FBtr0080896,FBtr0080897,FBtr0080898,FBtr0080899,FBtr0080900,FBtr0080901,FBtr0080902,FBtr0080903,FBtr0080905,FBtr0080906,FBtr0080907,FBtr0301827,FBtr0301828,FBtr0301829,FBtr0307492,FBtr0307493,FBtr0307494,FBtr0307495,FBtr0307496 | 459    | 109   | 1,33232E-38  | 2,07417 |
| <b>CG7637</b>        | FBgn0033548 | FBtr0088252                                                                                                                                                                                                                                     | 3018   | 711   | 2,07713E-252 | 2,08567 |
| <b>Tim10</b>         | FBgn0027360 | FBtr0071676                                                                                                                                                                                                                                     | 3119   | 732   | 5,88566E-262 | 2,09117 |
| <b>stan</b>          | FBgn0024836 | FBtr0088214,FBtr0300578                                                                                                                                                                                                                         | 1590   | 369   | 2,46706E-135 | 2,10733 |
| <b>Tim10</b>         | FBgn0027360 | FBtr0071677                                                                                                                                                                                                                                     | 3073   | 713   | 3,99202E-261 | 2,10767 |
| <b>CG34250</b>       | FBgn0085279 | FBtr0112444                                                                                                                                                                                                                                     | 281    | 65    | 1,19654E-24  | 2,11206 |
| <b>RpS21</b>         | FBgn0015521 | FBtr0077621,FBtr0077623,FBtr0273293                                                                                                                                                                                                             | 1777   | 409   | 1,45148E-152 | 2,11927 |
| <b>Hsp70Bc</b>       | FBgn0013279 | FBtr0082638                                                                                                                                                                                                                                     | 2160   | 496   | 1,22290E-185 | 2,12262 |
| <b>sphinx</b>        | FBgn0083990 | FBtr0111044,FBtr0111045                                                                                                                                                                                                                         | 577    | 131   | 9,90892E-51  | 2,13900 |
| <b>rg</b>            | FBgn0086911 | FBtr0290088                                                                                                                                                                                                                                     | 203    | 46    | 2,65205E-18  | 2,14177 |
| <b>rg</b>            | FBgn0086911 | FBtr0070745,FBtr0110993,FBtr0299588,FBtr0299589                                                                                                                                                                                                 | 203    | 46    | 2,65205E-18  | 2,14177 |
| <b>kis</b>           | FBgn0086902 | FBtr0078144,FBtr0299837                                                                                                                                                                                                                         | 25872  | 5823  | 0            | 2,15156 |
| <b>CG13041</b>       | FBgn0036605 | FBtr0075432                                                                                                                                                                                                                                     | 348    | 78    | 4,03172E-31  | 2,15754 |
| <b>Hsp70Bb</b>       | FBgn0013278 | FBtr0082637                                                                                                                                                                                                                                     | 2257   | 495   | 2,55133E-203 | 2,18891 |
| <b>mRpL33</b>        | FBgn0040907 | FBtr0070655                                                                                                                                                                                                                                     | 820    | 177   | 2,10745E-75  | 2,21187 |
| <b>snRNA:U12:73B</b> | FBgn0041721 | FBtr0075315                                                                                                                                                                                                                                     | 278    | 60    | 6,47495E-26  | 2,21205 |
| <b>CR40560</b>       | FBgn0085743 | FBtr0114193                                                                                                                                                                                                                                     | 510    | 110   | 3,27652E-47  | 2,21299 |
| <b>Hsp70Ba</b>       | FBgn0013277 | FBtr0082679                                                                                                                                                                                                                                     | 4096   | 882   | 0            | 2,21537 |
| <b>CR40677</b>       | FBgn0085765 | FBtr0114215                                                                                                                                                                                                                                     | 275    | 59    | 6,31482E-26  | 2,22064 |
| <b>CG13731</b>       | FBgn0036717 | FBtr0306800                                                                                                                                                                                                                                     | 304    | 65    | 1,30386E-28  | 2,22556 |
| <b>Obp83g</b>        | FBgn0046875 | FBtr0078617                                                                                                                                                                                                                                     | 253    | 53    | 2,13383E-24  | 2,25507 |
| <b>RpL32</b>         | FBgn0002626 | FBtr0085594                                                                                                                                                                                                                                     | 13427  | 2806  | 0            | 2,25855 |
| <b>RpL32</b>         | FBgn0002626 | FBtr0085592,FBtr0085593,FBtr0114555,FBtr0114556                                                                                                                                                                                                 | 13427  | 2805  | 0            | 2,25906 |
| <b>RpL9</b>          | FBgn0015756 | FBtr0080164                                                                                                                                                                                                                                     | 6292   | 1250  | 0            | 2,33159 |
| <b>RpL9</b>          | FBgn0015756 | FBtr0080163                                                                                                                                                                                                                                     | 6217   | 1230  | 0            | 2,33756 |
| <b>RpL29</b>         | FBgn0016726 | FBtr0071592,FBtr0071593,FBtr0305669                                                                                                                                                                                                             | 68236  | 13437 | 0            | 2,34432 |
| <b>LBR</b>           | FBgn0034657 | FBtr0071712                                                                                                                                                                                                                                     | 194    | 38    | 4,95286E-20  | 2,35199 |
| <b>dp</b>            | FBgn0053196 | FBtr0290006,FBtr0305136,FBtr0305137,FBtr0305138,FBtr0305139,FBtr0305140,FBtr0305141,FBtr0305142,FBtr0305143,FBtr0305144,FBtr0305145,FBtr0305146                                                                                                 | 24756  | 4829  | 0            | 2,35798 |
| <b>CR41544</b>       | FBgn0085799 | FBtr0114253                                                                                                                                                                                                                                     | 805    | 157   | 3,43329E-81  | 2,35822 |
| <b>CG7580</b>        | FBgn0036728 | FBtr0075222,FBtr0302509,FBtr0302510                                                                                                                                                                                                             | 1672   | 324   | 6,85330E-169 | 2,36751 |
| <b>RNaseP:RNA</b>    | FBgn0046696 | FBtr0085775                                                                                                                                                                                                                                     | 575    | 111   | 1,04906E-58  | 2,37300 |
| <b>Hsp70Bbb</b>      | FBgn0051354 | FBtr0082636                                                                                                                                                                                                                                     | 2241   | 425   | 2,46665E-230 | 2,39861 |
| <b>Doa</b>           | FBgn0259220 | FBtr0299751                                                                                                                                                                                                                                     | 2064   | 391   | 2,13191E-212 | 2,40020 |
| <b>dp</b>            | FBgn0053196 | FBtr0290006,FBtr0305136,FBtr0305137,FBtr0305138,FBtr0305139,FBtr0305140,FBtr0305141,FBtr0305143,FBtr0305144,FBtr0305145,FBtr0305146                                                                                                             | 886    | 165   | 7,61881E-93  | 2,42484 |
| <b>CR40639</b>       | FBgn0085758 | FBtr0114208                                                                                                                                                                                                                                     | 958    | 171   | 1,18640E-103 | 2,48603 |
| <b>CR40641</b>       | FBgn0085760 | FBtr0114210                                                                                                                                                                                                                                     | 928    | 158   | 3,57339E-104 | 2,55420 |
| <b>CR40640</b>       | FBgn0085759 | FBtr0114209                                                                                                                                                                                                                                     | 895    | 149   | 2,68610E-102 | 2,58658 |
| <b>RpL27</b>         | FBgn0039359 | FBtr0084932                                                                                                                                                                                                                                     | 157054 | 26028 | 0            | 2,59312 |
| <b>shot</b>          | FBgn0013733 | FBtr0087617,FBtr0087619,FBtr0087616,FBtr0273222,FBtr0273223,FBtr0273224,FBtr0273225,FBtr0273226,FBtr0301591,FBtr0301592,FBtr0301593,FBtr0304847,FBtr0304848,FBtr0304849,FBtr0304850,FBtr0304851,FBtr0304852,FBtr0304853                         | 297    | 49    | 1,44072E-34  | 2,59961 |
| <b>Doa</b>           | FBgn0259220 | FBtr0299743                                                                                                                                                                                                                                     | 678    | 111   | 1,32812E-78  | 2,61073 |
|                      |             | FBtr0302095,FBtr0302097,FBtr0302098,FBtr0302099,FBtr0302100,FBtr0302101,FBtr0302102,FBtr0302103                                                                                                                                                 | 222    | 36    | 2,10090E-26  | 2,62449 |
| <b>RpL31</b>         | FBgn0025286 | FBtr0088525                                                                                                                                                                                                                                     | 27890  | 4332  | 0            | 2,68664 |
| <b>RpL31</b>         | FBgn0025286 | FBtr0088526,FBtr0088527                                                                                                                                                                                                                         | 27815  | 4294  | 0            | 2,69547 |

|                       |             |                                                                                                                                                                                                                                                             |        |       |              |                |
|-----------------------|-------------|-------------------------------------------------------------------------------------------------------------------------------------------------------------------------------------------------------------------------------------------------------------|--------|-------|--------------|----------------|
| <b>CR41539</b>        | FBgn0085796 | FBtr0114250                                                                                                                                                                                                                                                 | 1168   | 179   | 2,65979E-141 | <b>2,70601</b> |
| <b>spen</b>           | FBgn0016977 | FBtr0078122                                                                                                                                                                                                                                                 | 412    | 63    | 2,80057E-50  | <b>2,70922</b> |
| <b>spen</b>           | FBgn0016977 | FBtr0078121,FBtr0306341                                                                                                                                                                                                                                     | 412    | 63    | 2,80057E-50  | <b>2,70922</b> |
| <b>CR40642</b>        | FBgn0085761 | FBtr0114211                                                                                                                                                                                                                                                 | 1042   | 159   | 1,51184E-126 | <b>2,71226</b> |
| <b>Lcp2</b>           | FBgn0002533 | FBtr0088761                                                                                                                                                                                                                                                 | 375    | 57    | 5,66580E-46  | <b>2,71786</b> |
| <b>CR41613</b>        | FBgn0085822 | FBtr0114280                                                                                                                                                                                                                                                 | 978    | 143   | 3,91405E-122 | <b>2,77382</b> |
| <b>RpL31</b>          | FBgn0025286 | FBtr0088527                                                                                                                                                                                                                                                 | 63967  | 9249  | 0            | <b>2,78996</b> |
| <b>RpL31</b>          | FBgn0025286 | FBtr0088526,FBtr0088525                                                                                                                                                                                                                                     | 63967  | 9247  | 0            | <b>2,79027</b> |
| <b>CR34335</b>        | FBgn0085364 | FBtr0307366                                                                                                                                                                                                                                                 | 116759 | 16764 | 0            | <b>2,80010</b> |
| <b>CG5021</b>         | FBgn0035944 | FBtr0301140                                                                                                                                                                                                                                                 | 295    | 42    | 8,52333E-38  | <b>2,81225</b> |
| <b>CG5021</b>         | FBgn0035944 | FBtr0076513,FBtr0301139                                                                                                                                                                                                                                     | 295    | 42    | 8,52333E-38  | <b>2,81225</b> |
| <b>CG5021</b>         | FBgn0035944 | FBtr0076514                                                                                                                                                                                                                                                 | 295    | 42    | 8,52333E-38  | <b>2,81225</b> |
| <b>CR40766</b>        | FBgn0085773 | FBtr0114223                                                                                                                                                                                                                                                 | 606    | 86    | 2,54423E-77  | <b>2,81691</b> |
| <b>shot</b>           | FBgn0013733 | FBtr0301964,FBtr0087621,FBtr0087617,FBtr0087618,FBtr0087619,FBtr0087620,FBtr0087616,FBtr0273222,FBtr0273223,FBtr0273224,FBtr0273225,FBtr0273226,FBtr0301591,FBtr0301592,FBtr0301593,FBtr0304847,FBtr0304848,FBtr0304849,FBtr0304850,FBtr0304852,FBtr0304853 | 3232   | 451   | 0            | <b>2,84123</b> |
| <b>Msp-300</b>        | FBgn0261836 | FBtr0303383,FBtr0303385,FBtr0303388,FBtr0303389                                                                                                                                                                                                             | 1405   | 196   | 2,23395E-180 | <b>2,84164</b> |
| <b>CG7580</b>         | FBgn0036728 | FBtr0075222,FBtr0302510                                                                                                                                                                                                                                     | 4472   | 604   | 0            | <b>2,88830</b> |
| <b>shot</b>           | FBgn0013733 | FBtr0087621                                                                                                                                                                                                                                                 | 2299   | 309   | 7,42956E-302 | <b>2,89533</b> |
| <b>RpS19a</b>         | FBgn0010412 | FBtr0074313                                                                                                                                                                                                                                                 | 5770   | 770   | 0            | <b>2,90564</b> |
| <b>l(2)efl</b>        | FBgn0011296 | FBtr0072101                                                                                                                                                                                                                                                 | 136    | 18    | 1,16224E-18  | <b>2,91754</b> |
| <b>l(2)efl</b>        | FBgn0011296 | FBtr0072100                                                                                                                                                                                                                                                 | 136    | 18    | 1,16224E-18  | <b>2,91754</b> |
| <b>CG7580</b>         | FBgn0036728 | FBtr0302509                                                                                                                                                                                                                                                 | 5172   | 678   | 0            | <b>2,93137</b> |
| <b>ple</b>            | FBgn0005626 | FBtr0076956,FBtr0076957                                                                                                                                                                                                                                     | 313    | 41    | 4,67102E-42  | <b>2,93247</b> |
| <b>Msp-300</b>        | FBgn0261836 | FBtr0303384                                                                                                                                                                                                                                                 | 10170  | 1318  | 0            | <b>2,94790</b> |
| <b>Msp-300</b>        | FBgn0261836 | FBtr0303387                                                                                                                                                                                                                                                 | 10155  | 1307  | 0            | <b>2,95786</b> |
| <b>CR41535</b>        | FBgn0085795 | FBtr0114249                                                                                                                                                                                                                                                 | 1735   | 220   | 8,22182E-236 | <b>2,97936</b> |
| <b>CR40668</b>        | FBgn0085764 | FBtr0114214                                                                                                                                                                                                                                                 | 1511   | 189   | 5,45978E-207 | <b>2,99905</b> |
| <b>shot</b>           | FBgn0013733 | FBtr0087617,FBtr0087618,FBtr0087619,FBtr0087616,FBtr0273222,FBtr0273223,FBtr0273224,FBtr0273225,FBtr0273226,FBtr0301591,FBtr0301592,FBtr0304849,FBtr0304850                                                                                                 | 226    | 27    | 3,11258E-32  | <b>3,06529</b> |
| <b>Lcp4</b>           | FBgn0002535 | FBtr0088744                                                                                                                                                                                                                                                 | 486    | 58    | 1,12664E-68  | <b>3,06683</b> |
| <b>zye</b>            | FBgn0036985 | FBtr0078191                                                                                                                                                                                                                                                 | 147    | 17    | 1,72053E-21  | <b>3,11221</b> |
| <b>Lcp3</b>           | FBgn0002534 | FBtr0088743                                                                                                                                                                                                                                                 | 183    | 21    | 1,24018E-26  | <b>3,12338</b> |
| <b>CG42500</b>        | FBgn0260226 | FBtr0300627                                                                                                                                                                                                                                                 | 282    | 32    | 3,83167E-41  | <b>3,13955</b> |
| <b>Msp-300</b>        | FBgn0261836 | FBtr0303383,FBtr0303384,FBtr0303385,FBtr0303386,FBtr0303387,FBtr0303388,FBtr0303389                                                                                                                                                                         | 704    | 76    | 3,04342E-104 | <b>3,21150</b> |
| <b>CG7580</b>         | FBgn0036728 | FBtr0075222                                                                                                                                                                                                                                                 | 700    | 74    | 7,99058E-105 | <b>3,24176</b> |
| <b>CG7580</b>         | FBgn0036728 | FBtr0302510                                                                                                                                                                                                                                                 | 700    | 74    | 7,99058E-105 | <b>3,24176</b> |
| <b>RpS19a</b>         | FBgn0010412 | FBtr0074312,FBtr0074311                                                                                                                                                                                                                                     | 5476   | 576   | 0            | <b>3,24898</b> |
| <b>CR41609</b>        | FBgn0085819 | FBtr0114277                                                                                                                                                                                                                                                 | 651    | 66    | 2,20914E-99  | <b>3,30212</b> |
| <b>CG34227</b>        | FBgn0085256 | FBtr0112420                                                                                                                                                                                                                                                 | 158    | 16    | 1,26353E-24  | <b>3,30378</b> |
| <b>Lin29</b>          | FBgn0262636 | FBtr0307043,FBtr0307044,FBtr0307045,FBtr0307046,FBtr0089129,FBtr0089128                                                                                                                                                                                     | 230    | 23    | 1,44564E-35  | <b>3,32193</b> |
| <b>CG6793</b>         | FBgn0036242 | FBtr0076051                                                                                                                                                                                                                                                 | 172    | 17    | 4,96306E-27  | <b>3,33880</b> |
| <b>CR40546</b>        | FBgn0085742 | FBtr0114192                                                                                                                                                                                                                                                 | 1356   | 133   | 8,49863E-210 | <b>3,34986</b> |
| <b>dp</b>             | FBgn0053196 | FBtr0290006,FBtr0305136,FBtr0305138,FBtr0305139,FBtr0305140,FBtr0305141,FBtr0305142,FBtr0305143,FBtr0305144,FBtr0305146                                                                                                                                     | 594    | 56    | 1,17436E-93  | <b>3,40696</b> |
| <b>Msp-300</b>        | FBgn0261836 | FBtr0303383,FBtr0303385                                                                                                                                                                                                                                     | 152    | 14    | 1,69611E-24  | <b>3,44057</b> |
| <b>shot</b>           | FBgn0013733 | FBtr0087617,FBtr0087616,FBtr0273222,FBtr0273223,FBtr0273224,FBtr0301591,FBtr0304849,FBtr0304850                                                                                                                                                             | 243    | 21    | 5,13686E-40  | <b>3,53250</b> |
| <b>CR40596</b>        | FBgn0085753 | FBtr0114203                                                                                                                                                                                                                                                 | 1657   | 137   | 4,78875E-275 | <b>3,59633</b> |
| <b>Lcp1</b>           | FBgn0002531 | FBtr0088763                                                                                                                                                                                                                                                 | 789    | 63    | 4,96932E-133 | <b>3,64660</b> |
| <b>CG11854</b>        | FBgn0039299 | FBtr0084811                                                                                                                                                                                                                                                 | 113    | 9     | 1,40418E-19  | <b>3,65025</b> |
| <b>shot</b>           | FBgn0013733 | FBtr0087618,FBtr0087619,FBtr0273225,FBtr0273226,FBtr0301592                                                                                                                                                                                                 | 362    | 28    | 8,52855E-62  | <b>3,69249</b> |
| <b>RpS4</b>           | FBgn0011284 | FBtr0075884                                                                                                                                                                                                                                                 | 1107   | 82    | 1,67400E-191 | <b>3,75489</b> |
| <b>CR40963</b>        | FBgn0085779 | FBtr0114230                                                                                                                                                                                                                                                 | 112    | 8     | 4,26876E-20  | <b>3,80735</b> |
| <b>GstS1</b>          | FBgn0010226 | FBtr0087006                                                                                                                                                                                                                                                 | 100    | 7     | 3,82447E-18  | <b>3,83650</b> |
| <b>7SLRNA:CR42652</b> | FBgn0261504 | FBtr0302398                                                                                                                                                                                                                                                 | 689    | 44    | 3,01389E-125 | <b>3,96893</b> |
| <b>CG17374</b>        | FBgn0040001 | FBtr0305959                                                                                                                                                                                                                                                 | 216    | 13    | 3,81913E-40  | <b>4,05445</b> |
| <b>RpS4</b>           | FBgn0011284 | FBtr0075885                                                                                                                                                                                                                                                 | 1058   | 62    | 4,68864E-197 | <b>4,09293</b> |
| <b>dp</b>             | FBgn0053196 | FBtr0290006,FBtr0305136,FBtr0305137,FBtr0305138,FBtr0305139,FBtr0305140,FBtr0305144,FBtr0305146                                                                                                                                                             | 446    | 26    | 1,70905E-83  | <b>4,10046</b> |
| <b>dp</b>             | FBgn0053196 | FBtr0290006,FBtr0305136,FBtr0305137,FBtr0305139,FBtr0305140,FBtr0305141,FBtr0305142,FBtr0305143,FBtr0305144,FBtr0305146                                                                                                                                     | 457    | 25    | 7,59119E-87  | <b>4,19219</b> |
| <b>dp</b>             | FBgn0053196 | FBtr0290006,FBtr0305136,FBtr0305137,FBtr0305138,FBtr0305139,FBtr0305140,FBtr0305143,FBtr0305146                                                                                                                                                             | 397    | 21    | 3,73179E-76  | <b>4,24068</b> |
| <b>7SLRNA:CR32864</b> | FBgn0000003 | FBtr0081624                                                                                                                                                                                                                                                 | 1163   | 57    | 2,25588E-227 | <b>4,35075</b> |
| <b>dp</b>             | FBgn0053196 | FBtr0290006,FBtr0305136,FBtr0305137,FBtr0305138,FBtr0305139,FBtr0305140,FBtr0305141,FBtr0305142,FBtr0305143,FBtr0305144                                                                                                                                     | 3523   | 157   | 0            | <b>4,48797</b> |
| <b>Or2a</b>           | FBgn0023523 | FBtr0070397                                                                                                                                                                                                                                                 | 961    | 31    | 5,00750E-205 | <b>4,95420</b> |
| <b>dp</b>             | FBgn0053196 | FBtr0290006,FBtr0305137,FBtr0305138,FBtr0305139,FBtr0305140,FBtr0305141,FBtr0305142,FBtr0305143,FBtr0305144                                                                                                                                                 | 121    | 3     | 3,55179E-27  | <b>5,33390</b> |
| <b>Cyp4g1</b>         | FBgn0010019 | FBtr0070099                                                                                                                                                                                                                                                 | 204    | 5     | 1,64451E-45  | <b>5,35050</b> |
| <b>RNaseMRP:RNA</b>   | FBgn0065098 | FBtr0091662                                                                                                                                                                                                                                                 | 641    | 11    | 3,72336E-149 | <b>5,86475</b> |
| <b>Obp56d</b>         | FBgn0034470 | FBtr0086477                                                                                                                                                                                                                                                 | 1032   | 16    | 2,51983E-242 | <b>6,01123</b> |
| <b>CG8664</b>         | FBgn0030836 | FBtr0074445                                                                                                                                                                                                                                                 | 133    | 2     | 1,57588E-31  | <b>6,05528</b> |
| <b>CG14302</b>        | FBgn0038647 | FBtr0083673                                                                                                                                                                                                                                                 | 84     | 1     | 2,82643E-20  | <b>6,39232</b> |
| <b>CG30025</b>        | FBgn0050025 | FBtr0088158                                                                                                                                                                                                                                                 | 109    | 1     | 9,98671E-27  | <b>6,76818</b> |



|                  |             |             |     |   |              |                 |
|------------------|-------------|-------------|-----|---|--------------|-----------------|
| <b>Jon65Aiv</b>  | FBgn0250815 | FBtr0077040 | 704 | 5 | 7,35623E-175 | <b>7,13750</b>  |
| <b>yip7</b>      | FBgn0040060 | FBtr0077038 | 282 | 2 | 6,30492E-70  | <b>7,13955</b>  |
| <b>CG30031</b>   | FBgn0050031 | FBtr0088123 | 243 | 1 | 2,03050E-61  | <b>7,92481</b>  |
| <b>Jon65Aiii</b> | FBgn0035665 | FBtr0077041 | 585 | 2 | 2,34171E-149 | <b>8,19229</b>  |
| <b>CG33333</b>   | FBgn0053333 | FBtr0083441 | 119 | 0 | 5,38256E-31  | <b>Infinity</b> |
| <b>gammaTry</b>  | FBgn0010359 | FBtr0088159 | 123 | 0 | 4,24171E-32  | <b>Infinity</b> |
| <b>Jon25Bi</b>   | FBgn0020906 | FBtr0100432 | 201 | 0 | 1,27844E-52  | <b>Infinity</b> |
| <b>Jon25Bi</b>   | FBgn0020906 | FBtr0079054 | 201 | 0 | 1,27844E-52  | <b>Infinity</b> |
| <b>deltaTry</b>  | FBgn0010358 | FBtr0088124 | 255 | 0 | 7,45484E-67  | <b>Infinity</b> |
| <b>CG42834</b>   | FBgn0262023 | FBtr0303853 | 278 | 0 | 6,67100E-73  | <b>Infinity</b> |
| <b>CG14332</b>   | FBgn0038509 | FBtr0083446 | 394 | 0 | 1,97948E-103 | <b>Infinity</b> |
