# Supplementary material for: New Partners in Regulation of Gene Expression: The Enhancer of Trithorax and Polycomb Corto Interacts with Methylated Ribosomal Protein L12 Via Its Chromodomain
Source: PubMed Central journal article supplement (PMC3469418; doi:10.1371/journal.pgen.1003006), 2012-10-11
Supplement: pgen.1003006.s008.pdf [file pgen.1003006.s008.pdf]

Table S4

| Flybase Gene Symbol | Flybase ID Genes | Flybase ID Transcripts                                                                                                  | Number of reads          |           | Adjusted P-value | log <sub>2</sub> (FC) |
|---------------------|------------------|-------------------------------------------------------------------------------------------------------------------------|--------------------------|-----------|------------------|-----------------------|
|                     |                  |                                                                                                                         | sd::Gal4>UAS::Rpl.12-Myc | sd::Gal4+ |                  |                       |
| <i>MrgBP</i>        | FBgn0033341      | FBtr0088684                                                                                                             | 1356                     | 678       | 2,02845E-24      | 1                     |
| <i>verm</i>         | FBgn00261341     | FBtr0074954,FBtr0074957,FBtr0302334,FBtr0302335                                                                         | 1130                     | 565       | 1,50215E-20      | 1                     |
| <i>Ing3</i>         | FBgn0030945      | FBtr0074614                                                                                                             | 1072                     | 536       | 1,55490E-19      | 1                     |
| <i>RpL34a</i>       | FBgn0039406      | FBtr0084972,FBtr0084973                                                                                                 | 1808                     | 904       | 3,01288E-32      | 1                     |
| <i>RFeSP</i>        | FBgn0021906      | FBtr0077915                                                                                                             | 3402                     | 1700      | 3,88114E-60      | 1,00085               |
| <i>CG6769</i>       | FBgn0030878      | FBtr0074493                                                                                                             | 2136                     | 1067      | 4,27646E-38      | 1,00135               |
| <i>RpL34a</i>       | FBgn0039406      | FBtr0302369                                                                                                             | 1806                     | 902       | 2,16063E-32      | 1,00160               |
| <i>CG12125</i>      | FBgn0030037      | FBtr0071246,FBtr0300383                                                                                                 | 1588                     | 793       | 1,35688E-28      | 1,00182               |
| <i>betaTub56D</i>   | FBgn0003887      | FBtr0086536,FBtr0086537                                                                                                 | 235587                   | 117616    | 0                | 1,00218               |
| <i>Pglym78</i>      | FBgn0014869      | FBtr0085384,FBtr0100482,FBtr0100483                                                                                     | 3008                     | 1501      | 1,51797E-53      | 1,00288               |
| <i>raptor</i>       | FBgn0029840      | FBtr0070885                                                                                                             | 4271                     | 2129      | 5,56110E-76      | 1,00440               |
| <i>Smr</i>          | FBgn0024308      | FBtr0073706,FBtr0073707,FBtr0073708                                                                                     | 19702                    | 9819      | 0                | 1,00469               |
| <i>px</i>           | FBgn0003175      | FBtr0071838                                                                                                             | 1130                     | 563       | 8,78571E-21      | 1,00512               |
| <i>elf-2alpha</i>   | FBgn0261609      | FBtr0074300                                                                                                             | 9500                     | 4730      | 2,15489E-164     | 1,00609               |
| <i>kst</i>          | FBgn0004167      | FBtr0073070,FBtr0073071,FBtr0073072,FBtr0303857,FBtr0300017                                                             | 25776                    | 12802     | 0                | 1,00966               |
| <i>mRpL35</i>       | FBgn0038923      | FBtr0084171                                                                                                             | 1019                     | 506       | 5,40967E-19      | 1,00994               |
| <i>CG10527</i>      | FBgn0034583      | FBtr0071541                                                                                                             | 1934                     | 959       | 1,58821E-35      | 1,01199               |
| <i>ATPsyn-b</i>     | FBgn0019644      | FBtr0076405,FBtr0076406                                                                                                 | 4670                     | 2315      | 1,23433E-84      | 1,01241               |
| <i>PHGPx</i>        | FBgn0035438      | FBtr0073066                                                                                                             | 1050                     | 520       | 8,72547E-20      | 1,01381               |
| <i>brat</i>         | FBgn0010300      | FBtr0304151                                                                                                             | 19588                    | 9699      | 0                | 1,01406               |
| <i>betaTub56D</i>   | FBgn0003887      | FBtr0086539                                                                                                             | 258292                   | 127875    | 0                | 1,01427               |
| <i>skpA</i>         | FBgn0025637      | FBtr0070124                                                                                                             | 1521                     | 753       | 3,11475E-28      | 1,01430               |
| <i>blw</i>          | FBgn0011211      | FBtr0071883                                                                                                             | 87603                    | 43300     | 0                | 1,01495               |
| <i>Updo</i>         | FBgn0033428      | FBtr0114567                                                                                                             | 2213                     | 1095      | 7,50417E-41      | 1,01507               |
| <i>CG32529</i>      | FBgn0052529      | FBtr0074800,FBtr0306520                                                                                                 | 2474                     | 1224      | 1,47043E-45      | 1,01524               |
| <i>Ef1beta</i>      | FBgn0028737      | FBtr0087041                                                                                                             | 36596                    | 18103     | 0                | 1,01546               |
| <i>chic</i>         | FBgn0000308      | FBtr0079235                                                                                                             | 2806                     | 1388      | 1,45487E-51      | 1,01551               |
| <i>CG9027</i>       | FBgn0033631      | FBtr0089939,FBtr0089938,FBtr0100658,FBtr0110897                                                                         | 6020                     | 2977      | 8,94467E-110     | 1,01590               |
| <i>CG9436</i>       | FBgn0033101      | FBtr0086134                                                                                                             | 2187                     | 1081      | 1,63834E-40      | 1,01659               |
| <i>CG4769</i>       | FBgn0035600      | FBtr0077144,FBtr0306086                                                                                                 | 2803                     | 1385      | 9,77260E-52      | 1,01709               |
| <i>CG9027</i>       | FBgn0033631      | FBtr0100658                                                                                                             | 3822                     | 1888      | 2,87431E-70      | 1,01747               |
| <i>CG17121</i>      | FBgn0039043      | FBtr0084361                                                                                                             | 1857                     | 917       | 1,34507E-34      | 1,01798               |
| <i>Spn27A</i>       | FBgn0028990      | FBtr0079321                                                                                                             | 10705                    | 5284      | 7,61289E-191     | 1,01858               |
| <i>RpS9</i>         | FBgn0010408      | FBtr0076423,FBtr0076425                                                                                                 | 13789                    | 6794      | 3,50698E-247     | 1,02118               |
| <i>nocte</i>        | FBgn0261710      | FBtr0071461                                                                                                             | 1940                     | 955       | 1,51231E-36      | 1,02248               |
|                     |                  | FBtr0071291,FBtr0071289                                                                                                 | 16918                    | 8328      | 4,02654E-304     | 1,02252               |
| <i>Tao-1</i>        | FBgn0031030      | FBtr0074771,FBtr0303999                                                                                                 | 996                      | 490       | 2,97305E-19      | 1,02336               |
| <i>betaTub56D</i>   | FBgn0003887      | FBtr0086538                                                                                                             | 248380                   | 122143    | 0                | 1,02398               |
| <i>RpL10Ab</i>      | FBgn0036213      | FBtr0302135                                                                                                             | 4650                     | 2286      | 8,23109E-87      | 1,02441               |
| <i>stan</i>         | FBgn0024836      | FBtr0088214,FBtr0300578,FBtr0303223,FBtr0304899,FBtr0304900                                                             | 9416                     | 4628      | 1,98716E-170     | 1,02473               |
| <i>Oscp</i>         | FBgn0016691      | FBtr0083064                                                                                                             | 4767                     | 2342      | 3,56421E-89      | 1,02534               |
| <i>Oscp</i>         | FBgn0016691      | FBtr0083063                                                                                                             | 5681                     | 2791      | 3,97931E-106     | 1,02536               |
| <i>br</i>           | FBgn0000210      | FBtr0300430                                                                                                             | 3420                     | 1680      | 3,21195E-64      | 1,02554               |
| <i>RpS7</i>         | FBgn0039757      | FBtr0089425,FBtr0089422,FBtr0089423                                                                                     | 61115                    | 29982     | 0                | 1,02743               |
| <i>Fer1HCH</i>      | FBgn0015222      | FBtr0085631,FBtr0085632,FBtr0085633,FBtr0085634,FBtr0306587,FBtr0306588                                                 | 2693                     | 1321      | 5,64049E-51      | 1,02758               |
| <i>Smr</i>          | FBgn0024308      | FBtr0073708                                                                                                             | 1854                     | 909       | 1,84214E-35      | 1,02829               |
| <i>Spp</i>          | FBgn0031260      | FBtr0078080                                                                                                             | 9160                     | 4489      | 1,77101E-167     | 1,02895               |
| <i>CG8399</i>       | FBgn0034067      | FBtr0087207                                                                                                             | 5734                     | 2810      | 5,60370E-108     | 1,02897               |
| <i>CG5446</i>       | FBgn0032429      | FBtr0080388                                                                                                             | 3683                     | 1804      | 8,45765E-70      | 1,02968               |
| <i>CG5903</i>       | FBgn0038400      | FBtr0083281                                                                                                             | 4957                     | 2423      | 2,48674E-94      | 1,03267               |
| <i>Dph5</i>         | FBgn0024558      | FBtr0084280                                                                                                             | 4202                     | 2052      | 2,54709E-80      | 1,03405               |
| <i>CG13185</i>      | FBgn0033661      | FBtr0113072                                                                                                             | 5630                     | 2748      | 1,50516E-107     | 1,03475               |
| <i>EfTuM</i>        | FBgn0024556      | FBtr0301389                                                                                                             | 7014                     | 3422      | 2,35071E-130     | 1,03540               |
| <i>pcx</i>          | FBgn0003048      | FBtr0070395                                                                                                             | 5518                     | 2692      | 1,48674E-105     | 1,03547               |
| <i>EfTuM</i>        | FBgn0024556      | FBtr0087670                                                                                                             | 7016                     | 3422      | 1,62204E-130     | 1,03581               |
| <i>CG30410</i>      | FBgn0050410      | FBtr0305675                                                                                                             | 4286                     | 2090      | 2,81962E-82      | 1,03613               |
| <i>CG12859</i>      | FBgn0033961      | FBtr0087440                                                                                                             | 1030                     | 502       | 1,75967E-20      | 1,03689               |
| <i>l(2)tid</i>      | FBgn0002174      | FBtr0089503,FBtr0089504                                                                                                 | 1700                     | 828       | 2,87285E-33      | 1,03783               |
| <i>CG13185</i>      | FBgn0033661      | FBtr0113071                                                                                                             | 5497                     | 2677      | 8,27084E-106     | 1,03803               |
| <i>bou</i>          | FBgn0261284      | FBtr0071004                                                                                                             | 3011                     | 1465      | 1,74781E-58      | 1,03934               |
| <i>l(2)tid</i>      | FBgn0002174      | FBtr0089505                                                                                                             | 1700                     | 827       | 2,17364E-33      | 1,03958               |
| <i>l(2)tid</i>      | FBgn0002174      | FBtr0306253                                                                                                             | 1700                     | 827       | 2,17364E-33      | 1,03958               |
| <i>Sop2</i>         | FBgn0001961      | FBtr0080569,FBtr0080570                                                                                                 | 4838                     | 2353      | 1,11810E-93      | 1,03991               |
| <i>RpS26</i>        | FBgn0261597      | FBtr0081090,FBtr0081089                                                                                                 | 17268                    | 8397      | 0                | 1,04016               |
| <i>Aats-ala</i>     | FBgn0027094      | FBtr0079721                                                                                                             | 7560                     | 3676      | 4,88035E-142     | 1,04025               |
| <i>mRpS29</i>       | FBgn0034727      | FBtr0071842                                                                                                             | 2019                     | 981       | 1,10317E-39      | 1,04132               |
| <i>sdt</i>          | FBgn0261873      | FBtr0308217,FBtr0308218,FBtr0308220                                                                                     | 1554                     | 754       | 7,06316E-31      | 1,04335               |
| <i>RpS5a</i>        | FBgn0002590      | FBtr0074406                                                                                                             | 76228                    | 36960     | 0                | 1,04436               |
| <i>RpL36</i>        | FBgn0002579      | FBtr0070155                                                                                                             | 949                      | 460       | 2,73177E-19      | 1,04477               |
| <i>l(1)G0334</i>    | FBgn0028235      | FBtr0070711,FBtr0070708,FBtr0070709,FBtr0070710                                                                         | 2644                     | 1281      | 3,09608E-52      | 1,04545               |
| <i>CG12203</i>      | FBgn0031021      | FBtr0074712                                                                                                             | 1856                     | 899       | 5,77592E-37      | 1,04580               |
| <i>mRpL27</i>       | FBgn0053002      | FBtr0077451                                                                                                             | 915                      | 443       | 1,13579E-18      | 1,04647               |
| <i>B52</i>          | FBgn0004587      | FBtr0082804,FBtr0082806                                                                                                 | 3676                     | 1779      | 1,38073E-72      | 1,04707               |
| <i>Ubp64E</i>       | FBgn0016756      | FBtr0077095,FBtr0306259                                                                                                 | 1292                     | 625       | 4,29989E-26      | 1,04768               |
| <i>Aats-ala</i>     | FBgn0027094      | FBtr0079722                                                                                                             | 7373                     | 3565      | 3,85872E-141     | 1,04835               |
| <i>RpL24</i>        | FBgn0032518      | FBtr0080524                                                                                                             | 36081                    | 17445     | 0                | 1,04843               |
| <i>CG9172</i>       | FBgn0030718      | FBtr0074151                                                                                                             | 3146                     | 1521      | 1,89804E-62      | 1,04850               |
| <i>CG9172</i>       | FBgn0030718      | FBtr0074152                                                                                                             | 3128                     | 1512      | 3,74710E-62      | 1,04878               |
| <i>Arc-p20</i>      | FBgn0031781      | FBtr0079200                                                                                                             | 1935                     | 935       | 8,41494E-39      | 1,04930               |
| <i>vav</i>          | FBgn0040068      | FBtr0074677,FBtr0074678,FBtr0113316                                                                                     | 2326                     | 1123      | 1,57235E-46      | 1,05049               |
| <i>Zw</i>           | FBgn0004057      | FBtr0074748,FBtr0074749                                                                                                 | 1413                     | 681       | 7,80737E-29      | 1,05303               |
| <i>Ten-a</i>        | FBgn0259240      | FBtr0300201,FBtr0300202,FBtr0300203,FBtr0300204,FBtr0299858,FBtr0299859,FBtr0299860,FBtr0308221,FBtr0308222,FBtr0308223 | 22871                    | 11010     | 0                | 1,05471               |
| <i>Roc1a</i>        | FBgn0025638      | FBtr0070122                                                                                                             | 2306                     | 1110      | 1,20580E-46      | 1,05483               |
| <i>RpL34b</i>       | FBgn0037686      | FBtr0082050                                                                                                             | 5473                     | 2634      | 1,21542E-109     | 1,05508               |
| <i>l(2)03709</i>    | FBgn0010551      | FBtr0086614,FBtr0086615,FBtr0086616,FBtr0112861,FBtr0112862,FBtr0112863                                                 | 6680                     | 3214      | 9,00205E-134     | 1,05548               |
|                     |                  | FBtr0273184                                                                                                             | 2311                     | 1111      | 6,74669E-47      | 1,05666               |
| <i>RpL34b</i>       | FBgn0037686      | FBtr0082049                                                                                                             | 5477                     | 2633      | 3,80051E-110     | 1,05668               |

|                    |             |                                                                                                                         |  |        |       |              |                |
|--------------------|-------------|-------------------------------------------------------------------------------------------------------------------------|--|--------|-------|--------------|----------------|
| <b>Tig</b>         | FBgn0011722 | FBtr0079275                                                                                                             |  | 986    | 474   | 1,45030E-20  | <b>1,05670</b> |
| <b>Updo</b>        | FBgn0033428 | FBtr0088524                                                                                                             |  | 2724   | 1309  | 2,88788E-55  | <b>1,05726</b> |
| <b>B52</b>         | FBgn0004587 | FBtr0082801,FBtr0082802,FBtr0082803,FBtr0300586,FBtr0300588,FBtr0300589,FBtr0308195,FBtr0308196,FBtr0308197             |  | 3637   | 1747  | 1,45863E-73  | <b>1,05787</b> |
| <b>CR41548</b>     | FBgn0085802 | FBtr0114256                                                                                                             |  | 2827   | 1357  | 1,68458E-57  | <b>1,05885</b> |
| <b>CG1943</b>      | FBgn0037468 | FBtr0081635                                                                                                             |  | 2292   | 1100  | 7,39472E-47  | <b>1,05910</b> |
| <b>CG9603</b>      | FBgn0040529 | FBtr0081855                                                                                                             |  | 2129   | 1021  | 1,12543E-43  | <b>1,06019</b> |
| <b>Tsp</b>         | FBgn0031850 | FBtr0079311,FBtr0079312,FBtr0079313,FBtr0079314,FBtr0114488                                                             |  | 3059   | 1466  | 1,60260E-62  | <b>1,06117</b> |
| <b>mRpL22</b>      | FBgn0030786 | FBtr0074330                                                                                                             |  | 1639   | 785   | 6,61194E-34  | <b>1,06205</b> |
| <b>RpL3</b>        | FBgn0020910 | FBtr0082346,FBtr0302586                                                                                                 |  | 179648 | 85974 | 0            | <b>1,06320</b> |
| <b>cp309</b>       | FBgn0086690 | FBtr0305977,FBtr0305978,FBtr0305979                                                                                     |  | 2467   | 1180  | 7,18769E-51  | <b>1,06397</b> |
| <b>RpL35</b>       | FBgn0029785 | FBtr0070800,FBtr0070801                                                                                                 |  | 39985  | 19116 | 0            | <b>1,06468</b> |
| <b>RpL9</b>        | FBgn0015756 | FBtr0080163,FBtr0080164                                                                                                 |  | 54967  | 26270 | 0            | <b>1,06515</b> |
| <b>Hsp60</b>       | FBgn0015245 | FBtr0073434,FBtr0073435                                                                                                 |  | 30921  | 14762 | 0            | <b>1,06670</b> |
| <b>Aats-glupro</b> | FBgn0005674 | FBtr0084511                                                                                                             |  | 7987   | 3810  | 1,11739E-159 | <b>1,06786</b> |
| <b>RpS9</b>        | FBgn0010408 | FBtr0076423,FBtr0076424                                                                                                 |  | 14398  | 6868  | 2,20976E-287 | <b>1,06791</b> |
| <b>RpS9</b>        | FBgn0010408 | FBtr0076425                                                                                                             |  | 14386  | 6861  | 2,57971E-287 | <b>1,06817</b> |
| <b>rhea</b>        | FBgn0260442 | FBtr0076627,FBtr0305210,FBtr0305211,FBtr0305212                                                                         |  | 7750   | 3695  | 3,21227E-155 | <b>1,06862</b> |
| <b>CG10249</b>     | FBgn0027596 | FBtr0087429,FBtr0112929,FBtr0303757                                                                                     |  | 1129   | 538   | 5,09001E-24  | <b>1,06937</b> |
| <b>CG9331</b>      | FBgn0032889 | FBtr0081419,FBtr0081420,FBtr0081421,FBtr0081417,FBtr0081418,FBtr0302942,FBtr0302943,FBtr0302944,FBtr0302945             |  | 3119   | 1486  | 5,74885E-65  | <b>1,06965</b> |
| <b>CG5548</b>      | FBgn0030605 | FBtr0073960                                                                                                             |  | 1564   | 745   | 5,87926E-33  | <b>1,06993</b> |
| <b>CG11505</b>     | FBgn0035424 | FBtr0073045,FBtr0073046,FBtr0308061                                                                                     |  | 7724   | 3679  | 3,48202E-155 | <b>1,07003</b> |
| <b>Mrtf</b>        | FBgn0052296 | FBtr0072944,FBtr0290067,FBtr0306331,FBtr0306332                                                                         |  | 926    | 441   | 7,12517E-20  | <b>1,07023</b> |
| <b>Rpt3</b>        | FBgn0028686 | FBtr0073436                                                                                                             |  | 11484  | 5459  | 6,92312E-232 | <b>1,07292</b> |
| <b>Mdh1</b>        | FBgn0262782 | FBtr0080050                                                                                                             |  | 5004   | 2377  | 1,15282E-104 | <b>1,07394</b> |
| <b>cic</b>         | FBgn0262582 | FBtr0305029                                                                                                             |  | 7631   | 3622  | 4,92467E-155 | <b>1,07509</b> |
| <b>BM-40-SPARC</b> | FBgn0026562 | FBtr0085094                                                                                                             |  | 2615   | 1241  | 2,68763E-55  | <b>1,07531</b> |
| <b>hang</b>        | FBgn0026575 | FBtr0074276,FBtr0074277                                                                                                 |  | 4626   | 2195  | 3,12667E-97  | <b>1,07554</b> |
| <b>CG30185</b>     | FBgn0050185 | FBtr0072060                                                                                                             |  | 1568   | 744   | 1,79184E-33  | <b>1,07555</b> |
| <b>Taf10</b>       | FBgn0028398 | FBtr0077717                                                                                                             |  | 1580   | 749   | 8,51566E-34  | <b>1,07689</b> |
| <b>RpL37a</b>      | FBgn0030616 | FBtr0074027                                                                                                             |  | 64643  | 30634 | 0            | <b>1,07736</b> |
| <b>Arp11</b>       | FBgn0031050 | FBtr0074760                                                                                                             |  | 1752   | 830   | 1,71734E-37  | <b>1,07782</b> |
| <b>trx</b>         | FBgn0003862 | FBtr0082950,FBtr0082949,FBtr0082947,FBtr0082948,FBtr0100277                                                             |  | 13768  | 6521  | 4,30880E-281 | <b>1,07815</b> |
| <b>RpS20</b>       | FBgn0019936 | FBtr0083964                                                                                                             |  | 48284  | 22860 | 0            | <b>1,07872</b> |
| <b>CG8111</b>      | FBgn0035825 | FBtr0076770                                                                                                             |  | 1234   | 584   | 8,45395E-27  | <b>1,07930</b> |
| <b>CG30499</b>     | FBgn0050499 | FBtr0088954                                                                                                             |  | 2545   | 1203  | 1,72548E-54  | <b>1,08103</b> |
| <b>Bruce</b>       | FBgn0037808 | FBtr0082239                                                                                                             |  | 16476  | 7785  | 0            | <b>1,08160</b> |
| <b>RpL11</b>       | FBgn0013325 | FBtr0086533                                                                                                             |  | 43709  | 20647 | 0            | <b>1,08200</b> |
| <b>RpL10Ab</b>     | FBgn0036213 | FBtr0076032,FBtr0304648                                                                                                 |  | 3961   | 1869  | 7,57611E-85  | <b>1,08360</b> |
| <b>RpL115</b>      | FBgn0004855 | FBtr0082925                                                                                                             |  | 2361   | 1114  | 7,38044E-51  | <b>1,08365</b> |
| <b>tutl</b>        | FBgn0010473 | FBtr0089271,FBtr0089269,FBtr0089270,FBtr0301863,FBtr0301864                                                             |  | 1560   | 736   | 6,24925E-34  | <b>1,08377</b> |
| <b>Tim10</b>       | FBgn0027360 | FBtr0071677,FBtr0071676                                                                                                 |  | 973    | 459   | 1,58722E-21  | <b>1,08395</b> |
| <b>proPO-A1</b>    | FBgn0261362 | FBtr0302291                                                                                                             |  | 1904   | 898   | 3,17951E-41  | <b>1,08425</b> |
| <b>RpL36</b>       | FBgn0002579 | FBtr0070158                                                                                                             |  | 1776   | 837   | 1,24978E-38  | <b>1,08533</b> |
| <b>CycG</b>        | FBgn0039858 | FBtr0085801                                                                                                             |  | 3220   | 1517  | 2,06798E-69  | <b>1,08584</b> |
| <b>cher</b>        | FBgn0014141 | FBtr0089471,FBtr0303364,FBtr0290014                                                                                     |  | 12825  | 6042  | 2,75630E-266 | <b>1,08586</b> |
| <b>CG2200</b>      | FBgn0030447 | FBtr0073721                                                                                                             |  | 1159   | 545   | 1,23436E-25  | <b>1,08855</b> |
| <b>RpL36</b>       | FBgn0002579 | FBtr0070156                                                                                                             |  | 1797   | 845   | 2,38795E-39  | <b>1,08857</b> |
| <b>capt</b>        | FBgn0261458 | FBtr0100022                                                                                                             |  | 1030   | 484   | 5,95350E-23  | <b>1,08957</b> |
| <b>Ahcy13</b>      | FBgn0014455 | FBtr0074030                                                                                                             |  | 11618  | 5455  | 8,39892E-244 | <b>1,09071</b> |
| <b>Ppox</b>        | FBgn0020018 | FBtr0084664                                                                                                             |  | 1430   | 669   | 4,94926E-32  | <b>1,09594</b> |
| <b>CG3321</b>      | FBgn0038224 | FBtr0082931,FBtr0082932,FBtr0303795                                                                                     |  | 4130   | 1931  | 5,80349E-91  | <b>1,09679</b> |
| <b>Scsalpha</b>    | FBgn0004888 | FBtr0073151,FBtr0303096                                                                                                 |  | 5813   | 2713  | 1,59555E-128 | <b>1,09939</b> |
| <b>scf</b>         | FBgn0025682 | FBtr0089942                                                                                                             |  | 1091   | 509   | 8,89578E-25  | <b>1,09991</b> |
| <b>vsg</b>         | FBgn0045823 | FBtr0076399,FBtr0076401                                                                                                 |  | 1392   | 649   | 1,59137E-31  | <b>1,10087</b> |
| <b>Got2</b>        | FBgn0001125 | FBtr0077867,FBtr0077868                                                                                                 |  | 903    | 421   | 9,86467E-21  | <b>1,10091</b> |
| <b>CG5261</b>      | FBgn0031912 | FBtr0079444                                                                                                             |  | 858    | 400   | 9,27935E-20  | <b>1,10098</b> |
| <b>RpS15</b>       | FBgn0034138 | FBtr0087123,FBtr0087124                                                                                                 |  | 47369  | 22078 | 0            | <b>1,10133</b> |
| <b>Pros29</b>      | FBgn0261394 | FBtr0071522                                                                                                             |  | 9725   | 4531  | 4,48414E-209 | <b>1,10187</b> |
| <b>CG3500</b>      | FBgn0034849 | FBtr0072038                                                                                                             |  | 894    | 416   | 1,33385E-20  | <b>1,10369</b> |
| <b>scf</b>         | FBgn0025682 | FBtr0089940                                                                                                             |  | 1090   | 507   | 4,79831E-25  | <b>1,10427</b> |
| <b>RpL36</b>       | FBgn0002579 | FBtr0070157                                                                                                             |  | 1774   | 825   | 3,14239E-40  | <b>1,10454</b> |
| <b>CG4542</b>      | FBgn0029906 | FBtr0070970                                                                                                             |  | 1200   | 557   | 1,29857E-27  | <b>1,10729</b> |
| <b>CG33156</b>     | FBgn0053156 | FBtr0087681,FBtr0087682,FBtr0087683,FBtr0087684,FBtr0113450                                                             |  | 1178   | 546   | 2,71163E-27  | <b>1,10937</b> |
| <b>Smr</b>         | FBgn0024308 | FBtr0073707                                                                                                             |  | 1827   | 846   | 6,59094E-42  | <b>1,11075</b> |
| <b>mRpL52</b>      | FBgn0033208 | FBtr0088942                                                                                                             |  | 793    | 367   | 1,05539E-18  | <b>1,11154</b> |
| <b>RpS7</b>        | FBgn0039757 | FBtr0089424                                                                                                             |  | 52580  | 24301 | 0            | <b>1,11350</b> |
| <b>Prosalpha5</b>  | FBgn0016697 | FBtr0086910,FBtr0086911                                                                                                 |  | 4518   | 2088  | 4,74544E-103 | <b>1,11356</b> |
| <b>Rbcn-3A</b>     | FBgn0023458 | FBtr0303341                                                                                                             |  | 10992  | 5071  | 2,52448E-243 | <b>1,11611</b> |
| <b>Sop2</b>        | FBgn0001961 | FBtr0080570                                                                                                             |  | 978    | 451   | 4,31329E-23  | <b>1,11671</b> |
| <b>Aldh-III</b>    | FBgn0010548 | FBtr0088993                                                                                                             |  | 1299   | 599   | 1,82255E-30  | <b>1,11677</b> |
| <b>RpL13</b>       | FBgn0011272 | FBtr0079888,FBtr0100164                                                                                                 |  | 64576  | 29771 | 0            | <b>1,11709</b> |
| <b>CG30410</b>     | FBgn0050410 | FBtr0301852                                                                                                             |  | 3924   | 1809  | 2,59922E-90  | <b>1,11713</b> |
| <b>Got2</b>        | FBgn0001125 | FBtr0100359                                                                                                             |  | 1628   | 750   | 4,89251E-38  | <b>1,11814</b> |
|                    |             | FBtr0302094,FBtr0302095,FBtr0302096,FBtr0302097,FBtr0302098,FBtr0302099,FBtr0302100,FBtr0302101,FBtr0302102,FBtr0302103 |  | 7429   | 3421  | 1,49151E-165 | <b>1,11875</b> |
| <b>vari</b>        | FBgn0250785 | FBtr0089947,FBtr0089946                                                                                                 |  | 3150   | 1450  | 4,95283E-73  | <b>1,11930</b> |
| <b>CG3523</b>      | FBgn0027571 | FBtr0077659,FBtr0290093                                                                                                 |  | 4259   | 1958  | 8,83308E-99  | <b>1,12113</b> |
| <b>vari</b>        | FBgn0250785 | FBtr0089945                                                                                                             |  | 3006   | 1381  | 3,96900E-70  | <b>1,12213</b> |
| <b>RpL36A</b>      | FBgn0031980 | FBtr0079546                                                                                                             |  | 36080  | 16561 | 0            | <b>1,12341</b> |
| <b>CG42669</b>     | FBgn0261551 | FBtr0302685,FBtr0302683,FBtr0302684,FBtr0302678,FBtr0302679,FBtr0302682,FBtr0302676,FBtr0306701,FBtr0306702,FBtr0306703 |  | 1623   | 744   | 1,86271E-38  | <b>1,12529</b> |
| <b>RpS6</b>        | FBgn0261592 | FBtr0071135,FBtr0071136                                                                                                 |  | 111250 | 50993 | 0            | <b>1,12543</b> |
| <b>RFesP</b>       | FBgn0021906 | FBtr0077914,FBtr0077915                                                                                                 |  | 743    | 340   | 3,79271E-18  | <b>1,12783</b> |
| <b>obst-B</b>      | FBgn0027600 | FBtr0079934                                                                                                             |  | 3586   | 1640  | 1,31360E-84  | <b>1,12868</b> |
| <b>mRpS16</b>      | FBgn0033907 | FBtr0087578                                                                                                             |  | 1052   | 481   | 1,82160E-25  | <b>1,12903</b> |
| <b>Cct5</b>        | FBgn0010621 | FBtr0087987,FBtr0087988                                                                                                 |  | 31691  | 14486 | 0            | <b>1,12941</b> |
| <b>larp</b>        | FBgn0261618 | FBtr0301180,FBtr0306389,FBtr0306390                                                                                     |  | 2050   | 937   | 8,34373E-49  | <b>1,12950</b> |
| <b>CG8036</b>      | FBgn0037607 | FBtr0081881                                                                                                             |  | 4799   | 2191  | 1,70528E-113 | <b>1,13114</b> |

|                   |             |                                                                                                                                                             |        |       |  |              |         |
|-------------------|-------------|-------------------------------------------------------------------------------------------------------------------------------------------------------------|--------|-------|--|--------------|---------|
| <i>tweek</i>      | FBgn0261671 | Fbtr0304927,Fbtr0304928,Fbtr0304929,<br>Fbtr0304930                                                                                                         | 6981   | 3187  |  | 1,34051E-159 | 1,13123 |
| <i>CR40728</i>    | FBgn0085769 | Fbtr0114219                                                                                                                                                 | 3614   | 1648  |  | 5,89390E-86  | 1,13288 |
| <i>CG8036</i>     | FBgn0037607 | Fbtr0081882                                                                                                                                                 | 4799   | 2188  |  | 5,09744E-114 | 1,13312 |
| <i>CG11873</i>    | FBgn0039633 | Fbtr0085365                                                                                                                                                 | 14527  | 6623  |  | 0            | 1,13318 |
| <i>spen</i>       | FBgn0016977 | Fbtr0078122,Fbtr0078121,Fbtr0078123,<br>Fbtr0306341                                                                                                         | 20572  | 9374  |  | 0            | 1,13395 |
| <i>RpL32</i>      | FBgn0002626 | Fbtr0114555,Fbtr0114556                                                                                                                                     | 38439  | 17501 |  | 0            | 1,13513 |
| <i>RpL32</i>      | FBgn0002626 | Fbtr0085592,Fbtr0085593,Fbtr0085594                                                                                                                         | 38440  | 17501 |  | 0            | 1,13517 |
| <i>mRpS35</i>     | FBgn0035374 | Fbtr0301626                                                                                                                                                 | 1007   | 458   |  | 8,85487E-25  | 1,13664 |
| <i>CG11151</i>    | FBgn0030519 | Fbtr0073819                                                                                                                                                 | 2118   | 963   |  | 3,89143E-51  | 1,13709 |
| <i>vsg</i>        | FBgn0045823 | Fbtr0076398,Fbtr0076400                                                                                                                                     | 1456   | 662   |  | 1,99537E-35  | 1,13711 |
| <i>CG17202</i>    | FBgn0038043 | Fbtr0082587                                                                                                                                                 | 2755   | 1252  |  | 2,33591E-66  | 1,13782 |
| <i>dom</i>        | FBgn0020306 | Fbtr0071602,Fbtr0071603,Fbtr0071604,<br>Fbtr0301350                                                                                                         | 4751   | 2159  |  | 5,70525E-114 | 1,13787 |
| <i>elf-3p40</i>   | FBgn0022023 | Fbtr0079030,Fbtr0079031                                                                                                                                     | 20098  | 9133  |  | 0            | 1,13789 |
| <i>CG10320</i>    | FBgn0034645 | Fbtr0071663,Fbtr0113101,Fbtr0113102,<br>Fbtr0300679,Fbtr0300680                                                                                             | 874    | 397   |  | 1,07774E-21  | 1,13849 |
| <i>CG31937</i>    | FBgn0031360 | Fbtr0077884                                                                                                                                                 | 1566   | 711   |  | 3,07450E-38  | 1,13916 |
| <i>CG34347</i>    | FBgn0085376 | Fbtr0290046                                                                                                                                                 | 1106   | 502   |  | 2,90180E-27  | 1,13959 |
| <i>skpA</i>       | FBgn0025637 | Fbtr0070126                                                                                                                                                 | 1350   | 612   |  | 3,64370E-33  | 1,14136 |
| <i>Hsp68</i>      | FBgn0001230 | Fbtr0084589                                                                                                                                                 | 2533   | 1148  |  | 1,41021E-61  | 1,14172 |
| <i>Smr</i>        | FBgn0024308 | Fbtr0073706                                                                                                                                                 | 1812   | 820   |  | 1,66556E-44  | 1,14389 |
| <i>mRpL49</i>     | FBgn0030433 | Fbtr0073691                                                                                                                                                 | 747    | 338   |  | 7,63433E-19  | 1,14409 |
| <i>betaTub56D</i> | FBgn0003887 | Fbtr0086536                                                                                                                                                 | 22722  | 10277 |  | 0            | 1,14467 |
| <i>CG32038</i>    | FBgn0052038 | Fbtr0076462                                                                                                                                                 | 991    | 448   |  | 9,69282E-25  | 1,14539 |
| <i>asrij</i>      | FBgn0034793 | Fbtr0071902                                                                                                                                                 | 1308   | 591   |  | 1,64796E-32  | 1,14613 |
| <i>RpS15Ab</i>    | FBgn0033555 | Fbtr0088226                                                                                                                                                 | 30053  | 13574 |  | 0            | 1,14666 |
| <i>CG2812</i>     | FBgn0034931 | Fbtr0072140                                                                                                                                                 | 1674   | 756   |  | 2,00998E-41  | 1,14684 |
| <i>CG6746</i>     | FBgn0032394 | Fbtr0080313                                                                                                                                                 | 1909   | 862   |  | 3,56162E-47  | 1,14706 |
| <i>Sop2</i>       | FBgn0001961 | Fbtr0080569                                                                                                                                                 | 960    | 433   |  | 3,60115E-24  | 1,14867 |
| <i>CG4692</i>     | FBgn0035033 | Fbtr0072339,Fbtr0072340                                                                                                                                     | 4614   | 2077  |  | 9,03463E-114 | 1,15152 |
| <i>Dpy-30L1</i>   | FBgn0032293 | Fbtr0080112                                                                                                                                                 | 1865   | 839   |  | 1,34589E-46  | 1,15243 |
| <i>CG14619</i>    | FBgn0031187 | Fbtr0077346,Fbtr0077347,Fbtr0077348                                                                                                                         | 872    | 392   |  | 2,67198E-22  | 1,15347 |
| <i>skpA</i>       | FBgn0025637 | Fbtr0070127                                                                                                                                                 | 1375   | 618   |  | 1,31705E-34  | 1,15375 |
| <i> fwd</i>       | FBgn0004373 | Fbtr0072516                                                                                                                                                 | 893    | 401   |  | 6,81503E-23  | 1,15506 |
| <i>Tpi</i>        | FBgn0086355 | Fbtr0085584                                                                                                                                                 | 4545   | 2040  |  | 5,24417E-113 | 1,15571 |
| <i>CG11999</i>    | FBgn0037312 | Fbtr0078807                                                                                                                                                 | 2133   | 957   |  | 1,46128E-53  | 1,15629 |
| <i>RpS3</i>       | FBgn0002622 | Fbtr0084410                                                                                                                                                 | 127827 | 57350 |  | 0            | 1,15633 |
| <i>CG7267</i>     | FBgn0030079 | Fbtr0071354                                                                                                                                                 | 2695   | 1207  |  | 8,72760E-68  | 1,15886 |
| <i>CG14184</i>    | FBgn0036932 | Fbtr0074872,Fbtr0302366                                                                                                                                     | 934    | 418   |  | 4,00500E-24  | 1,15992 |
| <i>zormin</i>     | FBgn0052311 | Fbtr0089864,Fbtr0110856,Fbtr0110857,<br>Fbtr0110858                                                                                                         | 3785   | 1689  |  | 8,71380E-96  | 1,16412 |
| <i>TfIIA-S</i>    | FBgn0013347 | Fbtr0084526                                                                                                                                                 | 5546   | 2474  |  | 3,45767E-140 | 1,16460 |
| <i>CG9350</i>     | FBgn0034576 | Fbtr0071530                                                                                                                                                 | 1299   | 578   |  | 1,19570E-33  | 1,16826 |
| <i>RpL35A</i>     | FBgn0037328 | Fbtr0078769                                                                                                                                                 | 24812  | 11033 |  | 0            | 1,16921 |
| <i>Cctgamma</i>   | FBgn0015019 | Fbtr0083338                                                                                                                                                 | 827    | 367   |  | 6,41575E-22  | 1,17211 |
| <i>Tpi</i>        | FBgn0086355 | Fbtr0085582,Fbtr0085583                                                                                                                                     | 4494   | 1994  |  | 1,74024E-115 | 1,17233 |
| <i>Act57B</i>     | FBgn0000044 | Fbtr0071519                                                                                                                                                 | 4280   | 1898  |  | 3,44358E-110 | 1,17313 |
| <i>Act57B</i>     | FBgn0000044 | Fbtr0300946                                                                                                                                                 | 4284   | 1899  |  | 1,81495E-110 | 1,17372 |
| <i>Mgstl</i>      | FBgn0025814 | Fbtr0077243                                                                                                                                                 | 953    | 422   |  | 3,09209E-25  | 1,17523 |
| <i>Dhc64C</i>     | FBgn0261797 | Fbtr0273370,Fbtr0073359                                                                                                                                     | 28549  | 12641 |  | 0            | 1,17533 |
| <i>MED14</i>      | FBgn0035145 | Fbtr0072554                                                                                                                                                 | 1189   | 526   |  | 2,20497E-31  | 1,17661 |
| <i>CG8191</i>     | FBgn0030675 | Fbtr0074083                                                                                                                                                 | 918    | 406   |  | 1,67769E-24  | 1,17701 |
| <i>CG13393</i>    | FBgn0032035 | Fbtr0079719                                                                                                                                                 | 3245   | 1434  |  | 1,51959E-84  | 1,17817 |
| <i>Sin</i>        | FBgn0028402 | Fbtr0304820                                                                                                                                                 | 1888   | 834   |  | 1,45531E-49  | 1,17874 |
| <i>ATPsyn-d</i>   | FBgn0016120 | Fbtr0083728                                                                                                                                                 | 9102   | 4018  |  | 2,02952E-228 | 1,17971 |
| <i>CG10249</i>    | FBgn0027596 | Fbtr0087430                                                                                                                                                 | 809    | 357   |  | 8,59212E-22  | 1,18022 |
| <i>Sin</i>        | FBgn0028402 | Fbtr0078288                                                                                                                                                 | 1888   | 833   |  | 1,03530E-49  | 1,18047 |
| <i>m2</i>         | FBgn0002592 | Fbtr0084981                                                                                                                                                 | 3767   | 1657  |  | 2,98810E-99  | 1,18484 |
| <i>CG3731</i>     | FBgn0038271 | Fbtr0083001                                                                                                                                                 | 781    | 343   |  | 2,70443E-21  | 1,18711 |
| <i>ATPsyn-d</i>   | FBgn0016120 | Fbtr0083727                                                                                                                                                 | 8970   | 3934  |  | 4,28410E-229 | 1,18911 |
| <i>r</i>          | FBgn0003189 | Fbtr0089734,Fbtr0089733                                                                                                                                     | 8357   | 3665  |  | 1,63811E-213 | 1,18917 |
| <i>rut</i>        | FBgn0003301 | Fbtr0073992,Fbtr0305581                                                                                                                                     | 3792   | 1659  |  | 1,87129E-101 | 1,19265 |
| <i>RpS14a</i>     | FBgn0004403 | Fbtr0071095                                                                                                                                                 | 12812  | 5603  |  | 0            | 1,19322 |
| <i>ash2</i>       | FBgn0000139 | Fbtr0084660                                                                                                                                                 | 1303   | 569   |  | 1,55793E-35  | 1,19534 |
| <i>CG13630</i>    | FBgn0039219 | Fbtr0084745                                                                                                                                                 | 2572   | 1123  |  | 2,04401E-69  | 1,19553 |
| <i>poe</i>        | FBgn0011230 | Fbtr0079545                                                                                                                                                 | 28310  | 12354 |  | 0            | 1,19633 |
| <i>levy</i>       | FBgn0034877 | Fbtr0072061                                                                                                                                                 | 7922   | 3457  |  | 4,05860E-205 | 1,19634 |
| <i>osa</i>        | FBgn0261885 | Fbtr0301487,Fbtr0089582,Fbtr0089581                                                                                                                         | 1117   | 487   |  | 9,55087E-31  | 1,19764 |
| <i>RpL40</i>      | FBgn0003941 | Fbtr0077470                                                                                                                                                 | 52488  | 22857 |  | 0            | 1,19935 |
| <i>CR41602</i>    | FBgn0085813 | Fbtr0114268                                                                                                                                                 | 10476  | 4558  |  | 3,56653E-273 | 1,20062 |
| <i>PHGPx</i>      | FBgn0035438 | Fbtr0073066,Fbtr0073067,Fbtr0073068                                                                                                                         | 6224   | 2700  |  | 7,33921E-170 | 1,20488 |
| <i>CG13349</i>    | FBgn0033886 | Fbtr0087610,Fbtr0087611,Fbtr0114493,<br>Fbtr0114494                                                                                                         | 3589   | 1556  |  | 1,91705E-98  | 1,20574 |
| <i>CG13349</i>    | FBgn0033886 | Fbtr0114495                                                                                                                                                 | 3590   | 1556  |  | 1,48786E-98  | 1,20614 |
| <i>nej</i>        | FBgn0261617 | Fbtr0302722,Fbtr0302723,Fbtr0071402                                                                                                                         | 10720  | 4642  |  | 4,91976E-283 | 1,20749 |
| <i>CG30415</i>    | FBgn0250838 | Fbtr0072031                                                                                                                                                 | 1305   | 565   |  | 1,77717E-36  | 1,20773 |
| <i>Trxr-1</i>     | FBgn0020653 | Fbtr0071168                                                                                                                                                 | 1082   | 468   |  | 1,79786E-30  | 1,20912 |
| <i>CG14235</i>    | FBgn0031066 | Fbtr0074815,Fbtr0074816,Fbtr0074817                                                                                                                         | 876    | 378   |  | 6,22016E-25  | 1,21254 |
| <i>CG5941</i>     | FBgn0029833 | Fbtr0070867,Fbtr0305344                                                                                                                                     | 1859   | 801   |  | 3,49880E-52  | 1,21465 |
| <i>br</i>         | FBgn0000210 | Fbtr0070261,Fbtr0070262,Fbtr0070263,<br>Fbtr0070265,Fbtr0070266,Fbtr0300427,<br>Fbtr0300428,Fbtr0300429,Fbtr0300430,<br>Fbtr0303562,Fbtr0303563,Fbtr0303564 | 33111  | 14266 |  | 0            | 1,21473 |
| <i>RpS14a</i>     | FBgn0004403 | Fbtr0071094                                                                                                                                                 | 12753  | 5493  |  | 0            | 1,21517 |
| <i>CG18809</i>    | FBgn0042132 | Fbtr0074810,Fbtr0074811                                                                                                                                     | 1332   | 573   |  | 8,72816E-38  | 1,21699 |
| <i>CG11876</i>    | FBgn0039635 | Fbtr0085366,Fbtr0085367,Fbtr0085368,<br>Fbtr0085369                                                                                                         | 623    | 268   |  | 3,56711E-18  | 1,21700 |
| <i>pck</i>        | FBgn0013720 | Fbtr0100198                                                                                                                                                 | 3369   | 1448  |  | 1,39936E-94  | 1,21826 |
| <i>pck</i>        | FBgn0013720 | Fbtr0070255,Fbtr0070256                                                                                                                                     | 3367   | 1446  |  | 8,87143E-95  | 1,21940 |
| <i>RpS11</i>      | FBgn0033699 | Fbtr0088007                                                                                                                                                 | 12208  | 5237  |  | 0            | 1,22101 |
| <i>Tom7</i>       | FBgn0033357 | Fbtr0088657                                                                                                                                                 | 3873   | 1661  |  | 3,25915E-109 | 1,22140 |
| <i>CG42574</i>    | FBgn0260794 | Fbtr0303911,Fbtr0303912,Fbtr0303913,<br>Fbtr0303914,Fbtr0303915,Fbtr0303917,<br>Fbtr0301437                                                                 | 2345   | 1004  |  | 1,07407E-66  | 1,22383 |
| <i>CG34383</i>    | FBgn0085412 | Fbtr0112621,Fbtr0112622,Fbtr0112623,<br>Fbtr0112624,Fbtr0290011                                                                                             | 6241   | 2669  |  | 6,21303E-177 | 1,22548 |
| <i>CG7637</i>     | FBgn0033548 | Fbtr0088252                                                                                                                                                 | 1664   | 711   |  | 7,13032E-48  | 1,22673 |
| <i>RpS11</i>      | FBgn0033699 | Fbtr0088006,Fbtr0088007                                                                                                                                     | 55357  | 23650 |  | 0            | 1,22693 |
| <i>sea</i>        | FBgn0037912 | Fbtr0100464                                                                                                                                                 | 6604   | 2819  |  | 4,73054E-188 | 1,22816 |
| <i>fabp</i>       | FBgn0037913 | Fbtr0100320,Fbtr0100321,Fbtr0100323                                                                                                                         | 6604   | 2819  |  | 4,73054E-188 | 1,22816 |
| <i>oil186-F</i>   | FBgn0041585 | Fbtr0086796,Fbtr0086797                                                                                                                                     | 707    | 301   |  | 4,82222E-21  | 1,23195 |

|                 |             |                                                                                                                                                                                                                                                                         |        |       |              |                |
|-----------------|-------------|-------------------------------------------------------------------------------------------------------------------------------------------------------------------------------------------------------------------------------------------------------------------------|--------|-------|--------------|----------------|
| <b>CG11438</b>  | FBgn0037164 | FBtr0078504                                                                                                                                                                                                                                                             | 2032   | 865   | 8,47996E-59  | <b>1,23213</b> |
| <b>wdb</b>      | FBgn0027492 | FBtr0085203,FBtr0085204                                                                                                                                                                                                                                                 | 610    | 259   | 2,30516E-18  | <b>1,23586</b> |
| <b>Rack1</b>    | FBgn0020618 | FBtr0079565                                                                                                                                                                                                                                                             | 130140 | 55225 | 0            | <b>1,23667</b> |
| <b>RpS18</b>    | FBgn0010411 | FBtr0086273,FBtr0086274                                                                                                                                                                                                                                                 | 60696  | 25697 | 0            | <b>1,24000</b> |
| <b>CG2310</b>   | FBgn0039665 | FBtr0085433,FBtr0085434                                                                                                                                                                                                                                                 | 4463   | 1889  | 3,60414E-130 | <b>1,24039</b> |
| <b>blot</b>     | FBgn0027660 | FBtr0075232,FBtr0075233                                                                                                                                                                                                                                                 | 1118   | 473   | 2,86418E-33  | <b>1,24101</b> |
| <b>Hsp26</b>    | FBgn0001225 | FBtr0076496                                                                                                                                                                                                                                                             | 16622  | 7030  | 0            | <b>1,24150</b> |
| <b>RpL35</b>    | FBgn0029785 | FBtr0070801                                                                                                                                                                                                                                                             | 7348   | 3106  | 1,76972E-206 | <b>1,24229</b> |
| <b>Act5C</b>    | FBgn0000042 | FBtr0070823                                                                                                                                                                                                                                                             | 8303   | 3508  | 1,67098E-233 | <b>1,24298</b> |
| <b>CG1354</b>   | FBgn0030151 | FBtr0089384,FBtr0089385,FBtr0089383                                                                                                                                                                                                                                     | 1224   | 516   | 1,39495E-36  | <b>1,24616</b> |
| <b>RpS21</b>    | FBgn0015521 | FBtr0077621,FBtr0077623,FBtr0273293                                                                                                                                                                                                                                     | 972    | 409   | 2,34572E-29  | <b>1,24886</b> |
| <b>CG7414</b>   | FBgn0037135 | FBtr0303246,FBtr0303247                                                                                                                                                                                                                                                 | 1006   | 423   | 2,11969E-30  | <b>1,24990</b> |
| <b>CG30415</b>  | FBgn0250838 | FBtr0072030                                                                                                                                                                                                                                                             | 1271   | 534   | 2,36104E-38  | <b>1,25105</b> |
| <b>CG7414</b>   | FBgn0037135 | FBtr0078441,FBtr0303245                                                                                                                                                                                                                                                 | 1007   | 423   | 1,62501E-30  | <b>1,25133</b> |
| <b>CG42574</b>  | FBgn0260794 | FBtr0303916                                                                                                                                                                                                                                                             | 2476   | 1039  | 3,84382E-74  | <b>1,25282</b> |
| <b>kek5</b>     | FBgn0031016 | FBtr0074707                                                                                                                                                                                                                                                             | 696    | 292   | 1,80572E-21  | <b>1,25312</b> |
| <b>sta</b>      | FBgn0003517 | FBtr0070289,FBtr0070290,FBtr0070291                                                                                                                                                                                                                                     | 91013  | 38139 | 0            | <b>1,25481</b> |
| <b>CG2021</b>   | FBgn0035271 | FBtr0072791                                                                                                                                                                                                                                                             | 771    | 322   | 6,37152E-24  | <b>1,25967</b> |
| <b>RpL29</b>    | FBgn0016726 | FBtr0071592,FBtr0071593,FBtr0305669                                                                                                                                                                                                                                     | 32177  | 13437 | 0            | <b>1,25982</b> |
| <b>CG3609</b>   | FBgn0031418 | FBtr0077791,FBtr0303027                                                                                                                                                                                                                                                 | 1608   | 671   | 4,40110E-49  | <b>1,26088</b> |
| <b>brm</b>      | FBgn0000212 | FBtr0075523,FBtr0075525                                                                                                                                                                                                                                                 | 607    | 253   | 4,14219E-19  | <b>1,26256</b> |
| <b>brm</b>      | FBgn0000212 | FBtr0075524                                                                                                                                                                                                                                                             | 607    | 252   | 2,84018E-19  | <b>1,26287</b> |
| <b>ksh</b>      | FBgn0040890 | FBtr0300214                                                                                                                                                                                                                                                             | 701    | 291   | 3,31346E-22  | <b>1,26840</b> |
| <b>LRP1</b>     | FBgn0053087 | FBtr0088791                                                                                                                                                                                                                                                             | 12347  | 5118  | 0            | <b>1,27051</b> |
| <b>mask</b>     | FBgn0043884 | FBtr0084562,FBtr0084563,FBtr0305043                                                                                                                                                                                                                                     | 32498  | 13467 | 0            | <b>1,27092</b> |
| <b>CG8193</b>   | FBgn0033367 | FBtr0088663                                                                                                                                                                                                                                                             | 2911   | 1203  | 2,19217E-90  | <b>1,27488</b> |
| <b>Hsc70-4</b>  | FBgn0001219 | FBtr0083057                                                                                                                                                                                                                                                             | 18436  | 7616  | 0            | <b>1,27542</b> |
| <b>CG4692</b>   | FBgn0035032 | FBtr0072340                                                                                                                                                                                                                                                             | 1299   | 536   | 6,32366E-41  | <b>1,27710</b> |
| <b>kek5</b>     | FBgn0031016 | FBtr0074708                                                                                                                                                                                                                                                             | 675    | 277   | 5,54844E-22  | <b>1,28500</b> |
|                 |             | FBtr0113128                                                                                                                                                                                                                                                             | 696    | 285   | 9,54732E-23  | <b>1,28813</b> |
| <b>Cyt-b5</b>   | FBgn0033189 | FBtr0088905                                                                                                                                                                                                                                                             | 863    | 353   | 4,45226E-28  | <b>1,28969</b> |
| <b>Ctggamma</b> | FBgn0015019 | FBtr0083337,FBtr0302370,FBtr0302371                                                                                                                                                                                                                                     | 764    | 312   | 5,22363E-25  | <b>1,29203</b> |
| <b>CG3446</b>   | FBgn0029868 | FBtr0070924                                                                                                                                                                                                                                                             | 3847   | 1571  | 1,00584E-122 | <b>1,29205</b> |
| <b>CG13551</b>  | FBgn0040660 | FBtr0072033,FBtr0072034                                                                                                                                                                                                                                                 | 826    | 337   | 5,11396E-27  | <b>1,29339</b> |
| <b>RpL18A</b>   | FBgn0010409 | FBtr0086947                                                                                                                                                                                                                                                             | 60777  | 24791 | 0            | <b>1,29371</b> |
| <b>CG13551</b>  | FBgn0040660 | FBtr0072035                                                                                                                                                                                                                                                             | 832    | 339   | 2,88453E-27  | <b>1,29530</b> |
| <b>N</b>        | FBgn0004647 | FBtr0070507,FBtr0304659                                                                                                                                                                                                                                                 | 50238  | 20453 | 0            | <b>1,29647</b> |
| <b>Mgstl</b>    | FBgn0025814 | FBtr0077242,FBtr0077243                                                                                                                                                                                                                                                 | 1080   | 439   | 1,96015E-35  | <b>1,29874</b> |
| <b>Tfb1</b>     | FBgn0033929 | FBtr0305616                                                                                                                                                                                                                                                             | 718    | 291   | 5,61648E-24  | <b>1,30296</b> |
| <b>Tfb1</b>     | FBgn0033929 | FBtr0087548,FBtr0087549                                                                                                                                                                                                                                                 | 718    | 291   | 5,61648E-24  | <b>1,30296</b> |
| <b>CG5938</b>   | FBgn0046247 | FBtr0085159,FBtr0085160                                                                                                                                                                                                                                                 | 765    | 310   | 1,81692E-25  | <b>1,30319</b> |
| <b>RpL3</b>     | FBgn0020910 | FBtr0082347,FBtr0082346,FBtr0302586                                                                                                                                                                                                                                     | 5585   | 2260  | 9,04915E-182 | <b>1,30523</b> |
| <b>Tfb1</b>     | FBgn0033929 | FBtr0087550                                                                                                                                                                                                                                                             | 754    | 305   | 2,94374E-25  | <b>1,30576</b> |
| <b>tyf</b>      | FBgn0026083 | FBtr0070643,FBtr0300931,FBtr0305180,FBtr0305181,FBtr0305182                                                                                                                                                                                                             | 1940   | 783   | 4,54019E-64  | <b>1,30897</b> |
| <b>olf186-F</b> | FBgn0041585 | FBtr0086795                                                                                                                                                                                                                                                             | 548    | 221   | 9,45318E-19  | <b>1,31013</b> |
| <b>Aldh-III</b> | FBgn0010548 | FBtr0300477                                                                                                                                                                                                                                                             | 640    | 258   | 1,13612E-21  | <b>1,31070</b> |
| <b>p16-ARC</b>  | FBgn0031437 | FBtr0077694                                                                                                                                                                                                                                                             | 3989   | 1608  | 3,70245E-131 | <b>1,31076</b> |
| <b>RpL3</b>     | FBgn0020910 | FBtr0082347                                                                                                                                                                                                                                                             | 36900  | 14850 | 0            | <b>1,31316</b> |
| <b>RpL26</b>    | FBgn0036825 | FBtr0075066                                                                                                                                                                                                                                                             | 53130  | 21381 | 0            | <b>1,31320</b> |
| <b>CR31144</b>  | FBgn0051144 | FBtr0303864                                                                                                                                                                                                                                                             | 36902  | 14849 | 0            | <b>1,31333</b> |
| <b>shot</b>     | FBgn0013733 | FBtr0301964,FBtr0087621,FBtr0087617,FBtr0087618,FBtr0087619,FBtr0087620,FBtr0087616,FBtr0273222,FBtr0273223,FBtr0273224,FBtr0273225,FBtr0273226,FBtr0301591,FBtr0301592,FBtr0301593,FBtr0304847,FBtr0304848,FBtr0304849,FBtr0304850,FBtr0304851,FBtr0304852,FBtr0304853 | 17016  | 6807  | 0            | <b>1,32180</b> |
| <b>CG42238</b>  | FBgn0250867 | FBtr0290305                                                                                                                                                                                                                                                             | 700    | 280   | 4,31219E-24  | <b>1,32193</b> |
| <b>CG4692</b>   | FBgn0035032 | FBtr0072339                                                                                                                                                                                                                                                             | 1205   | 481   | 4,20700E-41  | <b>1,32492</b> |
| <b>vfl</b>      | FBgn0259789 | FBtr0307536,FBtr0307537                                                                                                                                                                                                                                                 | 16920  | 6742  | 0            | <b>1,32748</b> |
| <b>RpL18</b>    | FBgn0035753 | FBtr0076892                                                                                                                                                                                                                                                             | 51658  | 20582 | 0            | <b>1,32761</b> |
| <b>CG34417</b>  | FBgn0085446 | FBtr0112703                                                                                                                                                                                                                                                             | 4622   | 1839  | 1,30786E-156 | <b>1,32960</b> |
| <b>CG9674</b>   | FBgn0036663 | FBtr0075341,FBtr0075344,FBtr0305915,FBtr0305916                                                                                                                                                                                                                         | 5183   | 2052  | 1,65759E-177 | <b>1,33676</b> |
| <b>CG9205</b>   | FBgn0035181 | FBtr0072621,FBtr0072622                                                                                                                                                                                                                                                 | 1486   | 588   | 1,96008E-51  | <b>1,33755</b> |
| <b>RpS14b</b>   | FBgn0004404 | FBtr0071096                                                                                                                                                                                                                                                             | 17193  | 6788  | 0            | <b>1,34076</b> |
| <b>RpL8</b>     | FBgn0261602 | FBtr0072925                                                                                                                                                                                                                                                             | 1847   | 729   | 3,67771E-64  | <b>1,34119</b> |
| <b>CG1620</b>   | FBgn0033183 | FBtr0088983,FBtr0300830                                                                                                                                                                                                                                                 | 2336   | 921   | 3,34598E-81  | <b>1,34277</b> |
| <b>faf</b>      | FBgn0005632 | FBtr0307549                                                                                                                                                                                                                                                             | 998    | 393   | 3,47063E-35  | <b>1,34451</b> |
| <b>RpL28</b>    | FBgn0035422 | FBtr0073095,FBtr0073097,FBtr0073098,FBtr0302300,FBtr0302301,FBtr0306567                                                                                                                                                                                                 | 58476  | 22974 | 0            | <b>1,34784</b> |
| <b>faf</b>      | FBgn0005632 | FBtr0085843,FBtr0085844,FBtr0307547,FBtr0307548,FBtr0307550                                                                                                                                                                                                             | 996    | 391   | 1,99334E-35  | <b>1,34898</b> |
| <b>RpL8</b>     | FBgn0261602 | FBtr0072924,FBtr0072925                                                                                                                                                                                                                                                 | 77654  | 30467 | 0            | <b>1,34981</b> |
| <b>RpL8</b>     | FBgn0261602 | FBtr0072924                                                                                                                                                                                                                                                             | 1818   | 713   | 4,22117E-64  | <b>1,35038</b> |
| <b>Ten-m</b>    | FBgn0004449 | FBtr0078509,FBtr0306107                                                                                                                                                                                                                                                 | 13224  | 5180  | 0            | <b>1,35213</b> |
| <b>vnc</b>      | FBgn0263251 | FBtr0076348,FBtr0076350,FBtr0076349                                                                                                                                                                                                                                     | 514    | 201   | 8,97391E-19  | <b>1,35457</b> |
| <b>CG42455</b>  | FBgn0259932 | FBtr0300238,FBtr0300239                                                                                                                                                                                                                                                 | 514    | 201   | 8,97391E-19  | <b>1,35457</b> |
| <b>CG3214</b>   | FBgn0031436 | FBtr0273393                                                                                                                                                                                                                                                             | 663    | 259   | 4,65282E-24  | <b>1,35606</b> |
| <b>Sod</b>      | FBgn0003462 | FBtr0076229                                                                                                                                                                                                                                                             | 16330  | 6364  | 0            | <b>1,35952</b> |
| <b>Pdsw</b>     | FBgn0021967 | FBtr0077520,FBtr0077521                                                                                                                                                                                                                                                 | 3079   | 1199  | 9,65291E-110 | <b>1,36063</b> |
| <b>HERC2</b>    | FBgn0031107 | FBtr0301344                                                                                                                                                                                                                                                             | 10653  | 4147  | 0            | <b>1,36112</b> |
| <b>CG9065</b>   | FBgn0030610 | FBtr0073966                                                                                                                                                                                                                                                             | 532    | 207   | 1,14323E-19  | <b>1,36180</b> |
| <b>Ef2b</b>     | FBgn0000559 | FBtr0085911                                                                                                                                                                                                                                                             | 11062  | 4304  | 0            | <b>1,36186</b> |
| <b>Aldh-III</b> | FBgn0010548 | FBtr0300478                                                                                                                                                                                                                                                             | 513    | 199   | 3,80716E-19  | <b>1,36619</b> |
| <b>RpS18</b>    | FBgn0010411 | FBtr0086273                                                                                                                                                                                                                                                             | 727    | 281   | 5,44742E-27  | <b>1,37139</b> |
| <b>CG34422</b>  | FBgn0085451 | FBtr0112723                                                                                                                                                                                                                                                             | 3153   | 1217  | 1,49290E-114 | <b>1,37340</b> |
| <b>CoVa</b>     | FBgn0019624 | FBtr0082474                                                                                                                                                                                                                                                             | 7478   | 2914  | 4,11407E-264 | <b>1,37882</b> |
| <b>CoVa</b>     | FBgn0019624 | FBtr0082473                                                                                                                                                                                                                                                             | 7573   | 2850  | 5,86938E-265 | <b>1,39073</b> |
| <b>Got2</b>     | FBgn0001125 | FBtr0077867                                                                                                                                                                                                                                                             | 678    | 258   | 5,23090E-26  | <b>1,39391</b> |
| <b>CG6543</b>   | FBgn0033879 | FBtr0087644                                                                                                                                                                                                                                                             | 568    | 216   | 5,14521E-22  | <b>1,39486</b> |
| <b>kis</b>      | FBgn0086902 | FBtr0299837                                                                                                                                                                                                                                                             | 1729   | 654   | 6,09444E-86  | <b>1,40258</b> |
| <b>CG3214</b>   | FBgn0031436 | FBtr0077745                                                                                                                                                                                                                                                             | 717    | 271   | 7,16269E-28  | <b>1,40368</b> |
| <b>ft</b>       | FBgn0001075 | FBtr0077478                                                                                                                                                                                                                                                             | 43774  | 16531 | 0            | <b>1,40490</b> |
| <b>RpL17</b>    | FBgn0029897 | FBtr0070982                                                                                                                                                                                                                                                             | 702    | 265   | 2,35785E-27  | <b>1,40548</b> |
| <b>CG16936</b>  | FBgn0027590 | FBtr0305309                                                                                                                                                                                                                                                             | 477    | 180   | 6,32678E-19  | <b>1,40599</b> |
| <b>CG16936</b>  | FBgn0027590 | FBtr0072436                                                                                                                                                                                                                                                             | 462    | 174   | 2,06832E-18  | <b>1,40881</b> |
| <b>scu</b>      | FBgn0021765 | FBtr0074511                                                                                                                                                                                                                                                             | 11634  | 4370  | 0            | <b>1,41264</b> |
| <b>CG9027</b>   | FBgn0033631 | FBtr0089939,FBtr0089938,FBtr0110897                                                                                                                                                                                                                                     | 1662   | 624   | 2,11347E-64  | <b>1,41330</b> |
| <b>RpL13A</b>   | FBgn0037351 | FBtr0078705                                                                                                                                                                                                                                                             | 65012  | 24399 | 0            | <b>1,41388</b> |
| <b>RpS26</b>    | FBgn0261597 | FBtr0081089                                                                                                                                                                                                                                                             | 67583  | 25308 | 0            | <b>1,41707</b> |

|                  |             |                                                                                                                                                                                                             |       |       |              |         |
|------------------|-------------|-------------------------------------------------------------------------------------------------------------------------------------------------------------------------------------------------------------|-------|-------|--------------|---------|
| <b>RpS26</b>     | FBgn0261597 | FBtr0081090                                                                                                                                                                                                 | 67583 | 25308 | 0            | 1,41707 |
| <b>RpS26</b>     | FBgn0261597 | FBtr0081091                                                                                                                                                                                                 | 67591 | 25311 | 0            | 1,41707 |
| <b>RpS18</b>     | FBgn0010411 | FBtr0086274                                                                                                                                                                                                 | 802   | 300   | 1,15051E-31  | 1,41864 |
| <b>CG6543</b>    | FBgn0033879 | FBtr0087643                                                                                                                                                                                                 | 594   | 222   | 1,10233E-23  | 1,41990 |
| <b>TfIIA-L</b>   | FBgn0011289 | FBtr0085155,FBtr0085156                                                                                                                                                                                     | 504   | 188   | 2,38395E-20  | 1,42269 |
| <b>kis</b>       | FBgn0086902 | FBtr0078144                                                                                                                                                                                                 | 704   | 261   | 2,16974E-28  | 1,43153 |
| <b>CG5794</b>    | FBgn0039214 | FBtr0084667,FBtr0084668,FBtr0306172                                                                                                                                                                         | 7786  | 2874  | 1,08681E-294 | 1,43782 |
| <b>RpS7</b>      | FBgn0039757 | FBtr0089423                                                                                                                                                                                                 | 5477  | 2021  | 3,11347E-218 | 1,43832 |
| <b>CG9775</b>    | FBgn0037261 | FBtr0301297,FBtr0078894                                                                                                                                                                                     | 835   | 308   | 7,12469E-34  | 1,43885 |
| <b>uif</b>       | FBgn0031879 | FBtr0079354,FBtr0307072,FBtr0307073,FBtr0307074,FBtr0290119,FBtr0302162                                                                                                                                     | 53062 | 19565 | 0            | 1,43940 |
| <b>Msp-300</b>   | FBgn0261836 | FBtr0303385,FBtr0303387,FBtr0303388,FBtr0303389                                                                                                                                                             | 20108 | 7412  | 0            | 1,43983 |
| <b>CG34417</b>   | FBgn0085446 | FBtr0112703,FBtr0112704,FBtr0112706,FBtr0112707,FBtr0303205,FBtr0303206,FBtr0301323,FBtr0301324                                                                                                             | 642   | 234   | 6,02278E-27  | 1,45606 |
| <b>CG1702</b>    | FBgn0031117 | FBtr0077310,FBtr0300210                                                                                                                                                                                     | 580   | 211   | 1,95504E-24  | 1,45881 |
| <b>RpL12</b>     | FBgn0034968 | FBtr0072175,FBtr0072174                                                                                                                                                                                     | 7359  | 2676  | 1,06329E-286 | 1,45943 |
| <b>tweek</b>     | FBgn0261671 | FBtr0304928,FBtr0304929                                                                                                                                                                                     | 564   | 205   | 6,36952E-24  | 1,46007 |
| <b>RpS7</b>      | FBgn0039757 | FBtr0089424,FBtr0089425,FBtr0089422                                                                                                                                                                         | 5340  | 1937  | 3,10484E-220 | 1,46302 |
| <b>l(1)G0230</b> | FBgn0028342 | FBtr0071438                                                                                                                                                                                                 | 9175  | 3325  | 0            | 1,46435 |
| <b>tweek</b>     | FBgn0261671 | FBtr0304927,FBtr0304930                                                                                                                                                                                     | 563   | 204   | 5,36343E-24  | 1,46457 |
| <b>dikar</b>     | FBgn0261934 | FBtr0303751                                                                                                                                                                                                 | 914   | 330   | 1,02140E-38  | 1,46973 |
| <b>RpL12</b>     | FBgn0034968 | FBtr0072176                                                                                                                                                                                                 | 7369  | 2652  | 9,52401E-293 | 1,47439 |
| <b>Ten-a</b>     | FBgn0259240 | FBtr0300202,FBtr0300203,FBtr0300204,FBtr0299858,FBtr0299859,FBtr0299860,FBtr0308221,FBtr0308222,FBtr0308223                                                                                                 | 459   | 165   | 6,01706E-20  | 1,47603 |
| <b>CG1746</b>    | FBgn0039830 | FBtr0085773                                                                                                                                                                                                 | 426   | 153   | 1,16010E-18  | 1,47732 |
| <b>CG1607</b>    | FBgn0039844 | FBtr0085786                                                                                                                                                                                                 | 530   | 190   | 4,05734E-23  | 1,47999 |
| <b>CG13319</b>   | FBgn0033781 | FBtr0300890                                                                                                                                                                                                 | 1128  | 403   | 1,51085E-48  | 1,48492 |
| <b>CG13319</b>   | FBgn0033781 | FBtr0087788                                                                                                                                                                                                 | 1128  | 403   | 1,51085E-48  | 1,48492 |
| <b>mask</b>      | FBgn0043884 | FBtr0305043                                                                                                                                                                                                 | 3444  | 1230  | 1,27091E-146 | 1,48543 |
| <b>CG34306</b>   | FBgn0085335 | FBtr0112502                                                                                                                                                                                                 | 468   | 167   | 1,29914E-20  | 1,48666 |
| <b>Cpr49Ag</b>   | FBgn0033730 | FBtr0087922                                                                                                                                                                                                 | 1121  | 400   | 2,31493E-48  | 1,48671 |
| <b>mask</b>      | FBgn0043884 | FBtr0084562,FBtr0084563                                                                                                                                                                                     | 3443  | 1227  | 3,00523E-147 | 1,48853 |
| <b>CR40502</b>   | FBgn0085737 | FBtr0114187                                                                                                                                                                                                 | 1517  | 540   | 1,83393E-65  | 1,49019 |
| <b>l(2)03709</b> | FBgn0010551 | FBtr0086614,FBtr0086615,FBtr0112861,FBtr0112862                                                                                                                                                             | 411   | 146   | 2,32033E-18  | 1,49317 |
| <b>brat</b>      | FBgn0010300 | FBtr0081159                                                                                                                                                                                                 | 567   | 201   | 3,69156E-25  | 1,49615 |
| <b>verm</b>      | FBgn0261341 | FBtr0074956,FBtr0302333,FBtr0302334                                                                                                                                                                         | 771   | 273   | 5,76557E-34  | 1,49783 |
| <b>RpS12</b>     | FBgn0260441 | FBtr0075878                                                                                                                                                                                                 | 39217 | 13793 | 0            | 1,50754 |
| <b>CG8184</b>    | FBgn0030674 | FBtr0074082                                                                                                                                                                                                 | 32770 | 11476 | 0            | 1,51376 |
| <b>futsch</b>    | FBgn0259108 | FBtr0112628,FBtr0307597,FBtr0307598                                                                                                                                                                         | 552   | 193   | 4,45728E-25  | 1,51607 |
| <b>mamo</b>      | FBgn0263115 | FBtr0112554,FBtr0307299,FBtr0307298,FBtr0112555,FBtr0303571                                                                                                                                                 | 644   | 225   | 3,05928E-29  | 1,51714 |
| <b>Hsp60</b>     | FBgn0015245 | FBtr0073434                                                                                                                                                                                                 | 2117  | 739   | 1,92599E-94  | 1,51838 |
| <b>trx</b>       | FBgn0003862 | FBtr0082950,FBtr0082947                                                                                                                                                                                     | 814   | 284   | 7,73322E-37  | 1,51914 |
| <b>Mi-2</b>      | FBgn0262519 | FBtr0074919,FBtr0302046                                                                                                                                                                                     | 777   | 271   | 3,22826E-35  | 1,51962 |
| <b>Mi-2</b>      | FBgn0262519 | FBtr0100394                                                                                                                                                                                                 | 778   | 271   | 2,35543E-35  | 1,52148 |
| <b>trol</b>      | FBgn0261451 | FBtr0091965,FBtr0305158,FBtr0305159,FBtr0305160,FBtr0305161,FBtr0305162,FBtr0305164,FBtr0305167,FBtr0305168,FBtr0305169,FBtr0305170,FBtr0305171,FBtr0305172,FBtr0305173,FBtr0305174,FBtr0305175,FBtr0305176 | 472   | 163   | 5,23314E-22  | 1,53391 |
| <b>pix</b>       | FBgn0086706 | FBtr0076558                                                                                                                                                                                                 | 1642  | 566   | 4,56731E-75  | 1,53658 |
| <b>RpS8</b>      | FBgn0039713 | FBtr0085489,FBtr0306645                                                                                                                                                                                     | 79075 | 27184 | 0            | 1,54046 |
| <b>CG42574</b>   | FBgn0260794 | FBtr0303911,FBtr0303913,FBtr0303915,FBtr0303916,FBtr0301437                                                                                                                                                 | 1586  | 544   | 3,45290E-73  | 1,54371 |
| <b>Cyp4e2</b>    | FBgn0014469 | FBtr0088745                                                                                                                                                                                                 | 950   | 323   | 8,81515E-45  | 1,55639 |
| <b>btSz</b>      | FBgn0053555 | FBtr0091530,FBtr0273200,FBtr0306612                                                                                                                                                                         | 2600  | 883   | 1,30122E-121 | 1,55803 |
| <b>CR33222</b>   | FBgn0053222 | FBtr0300652                                                                                                                                                                                                 | 3189  | 1083  | 4,43155E-149 | 1,55807 |
| <b>CR12628</b>   | FBgn0042701 | FBtr0085952                                                                                                                                                                                                 | 1066  | 362   | 2,33199E-50  | 1,55815 |
| <b>Bet5</b>      | FBgn0260860 | FBtr0085570                                                                                                                                                                                                 | 748   | 254   | 1,34826E-35  | 1,55821 |
| <b>Hsp70Bb</b>   | FBgn0013278 | FBtr0082637                                                                                                                                                                                                 | 1484  | 495   | 5,24905E-72  | 1,58399 |
| <b>elF-3p40</b>  | FBgn0202203 | FBtr0079030                                                                                                                                                                                                 | 2971  | 986   | 1,06406E-144 | 1,59129 |
| <b>Sac1</b>      | FBgn0035195 | FBtr0072652                                                                                                                                                                                                 | 417   | 138   | 4,15926E-21  | 1,59538 |
| <b>RpL17</b>     | FBgn0029897 | FBtr0070980,FBtr0070981,FBtr0070982,FBtr0070983                                                                                                                                                             | 64301 | 21266 | 0            | 1,59629 |
| <b>Hsp70Ab</b>   | FBgn0013278 | FBtr0082482                                                                                                                                                                                                 | 6355  | 2096  | 5,0911E-312  | 1,60025 |
| <b>l(2)35Di</b>  | FBgn0001989 | FBtr0080771,FBtr0080772                                                                                                                                                                                     | 2139  | 702   | 2,34782E-106 | 1,60739 |
| <b>CG42574</b>   | FBgn0260794 | FBtr0303913                                                                                                                                                                                                 | 2258  | 739   | 7,95111E-113 | 1,61140 |
| <b>CG42574</b>   | FBgn0260794 | FBtr0303912,FBtr0303915,FBtr0301437                                                                                                                                                                         | 2258  | 739   | 7,95111E-113 | 1,61140 |
| <b>CG42574</b>   | FBgn0260794 | FBtr0303911,FBtr0303914,FBtr0303916,FBtr0303917                                                                                                                                                             | 2268  | 742   | 2,76007E-113 | 1,61193 |
| <b>Hsp70Aa</b>   | FBgn0013275 | FBtr0082512                                                                                                                                                                                                 | 6244  | 2041  | 2,2398E-311  | 1,61319 |
| <b>w</b>         | FBgn0003996 | FBtr0070490                                                                                                                                                                                                 | 24501 | 7981  | 0            | 1,61820 |
| <b>LBR</b>       | FBgn0034657 | FBtr0071713                                                                                                                                                                                                 | 1067  | 347   | 2,98977E-54  | 1,62055 |
| <b>pix</b>       | FBgn0086706 | FBtr0076557                                                                                                                                                                                                 | 2667  | 865   | 3,47800E-135 | 1,62445 |
| <b>NP15.6</b>    | FBgn0027785 | FBtr0083712                                                                                                                                                                                                 | 3717  | 1205  | 3,10931E-188 | 1,62511 |
| <b>Hsp70Bc</b>   | FBgn0013279 | FBtr0082638                                                                                                                                                                                                 | 1532  | 496   | 3,53658E-78  | 1,62700 |
| <b>CG42497</b>   | FBgn0260223 | FBtr0300626                                                                                                                                                                                                 | 3700  | 1191  | 1,60227E-189 | 1,63535 |
| <b>CG13044</b>   | FBgn0036599 | FBtr0075470                                                                                                                                                                                                 | 1672  | 537   | 2,29718E-86  | 1,63858 |
| <b>rg</b>        | FBgn0086911 | FBtr0110993,FBtr0290088,FBtr0299589                                                                                                                                                                         | 352   | 113   | 8,07683E-19  | 1,63925 |
| <b>CG14566</b>   | FBgn0037127 | FBtr0078453                                                                                                                                                                                                 | 1311  | 419   | 1,93231E-68  | 1,64565 |
| <b>RpL17</b>     | FBgn0029897 | FBtr0070981                                                                                                                                                                                                 | 626   | 200   | 4,35608E-33  | 1,64816 |
| <b>LBR</b>       | FBgn0034657 | FBtr0071711,FBtr0071712                                                                                                                                                                                     | 1047  | 334   | 5,25938E-55  | 1,64834 |
| <b>RpS17</b>     | FBgn0005533 | FBtr0076479                                                                                                                                                                                                 | 34716 | 11037 | 0            | 1,65325 |
| <b>RpS30</b>     | FBgn0038834 | FBtr0083969                                                                                                                                                                                                 | 1394  | 442   | 1,45428E-73  | 1,65711 |
| <b>elF-3p40</b>  | FBgn0022023 | FBtr0079031                                                                                                                                                                                                 | 2814  | 891   | 3,27338E-148 | 1,65912 |
| <b>RpS10b</b>    | FBgn0261593 | FBtr0308192                                                                                                                                                                                                 | 5661  | 1792  | 9,82692E-298 | 1,65949 |
| <b>sta</b>       | FBgn0003517 | FBtr0070291                                                                                                                                                                                                 | 42546 | 13449 | 0            | 1,66152 |
| <b>sta</b>       | FBgn0003517 | FBtr0070289,FBtr0070290                                                                                                                                                                                     | 42480 | 13414 | 0            | 1,66304 |
| <b>CG10320</b>   | FBgn0034645 | FBtr0300679,FBtr0300680                                                                                                                                                                                     | 441   | 139   | 4,20980E-24  | 1,66569 |
| <b>CG10320</b>   | FBgn0034645 | FBtr0113101,FBtr0113102                                                                                                                                                                                     | 441   | 139   | 4,20980E-24  | 1,66569 |
| <b>CG10320</b>   | FBgn0034645 | FBtr0071663                                                                                                                                                                                                 | 441   | 139   | 4,20980E-24  | 1,66569 |
| <b>RpS10b</b>    | FBgn0261593 | FBtr0074731,FBtr0074732                                                                                                                                                                                     | 5626  | 1765  | 3,36163E-300 | 1,67244 |
| <b>RpS13</b>     | FBgn0010265 | FBtr0079724                                                                                                                                                                                                 | 1490  | 466   | 2,02153E-80  | 1,67691 |
| <b>RpS13</b>     | FBgn0010265 | FBtr0100541                                                                                                                                                                                                 | 1490  | 466   | 2,02153E-80  | 1,67691 |
| <b>CG11943</b>   | FBgn0031078 | FBtr0074798                                                                                                                                                                                                 | 509   | 159   | 4,97075E-28  | 1,67864 |
| <b>CG11943</b>   | FBgn0031078 | FBtr0074799                                                                                                                                                                                                 | 509   | 159   | 4,97075E-28  | 1,67864 |
| <b>Doa</b>       | FBgn0259220 | FBtr0299747                                                                                                                                                                                                 | 934   | 290   | 2,69728E-51  | 1,68737 |
| <b>RpLP1</b>     | FBgn0002593 | FBtr0078056                                                                                                                                                                                                 | 66904 | 20638 | 0            | 1,69679 |

|                   |             |                                                                                                                                                                                                                                                 |        |       |              |                 |
|-------------------|-------------|-------------------------------------------------------------------------------------------------------------------------------------------------------------------------------------------------------------------------------------------------|--------|-------|--------------|-----------------|
| <b>RpL17</b>      | FBgn0029897 | FBtr0070983                                                                                                                                                                                                                                     | 600    | 184   | 6,88621E-34  | <b>1,70526</b>  |
| <b>Hsp70Ba</b>    | FBgn0013277 | FBtr0082679                                                                                                                                                                                                                                     | 2890   | 882   | 2,99430E-161 | <b>1,71222</b>  |
| <b>RNaseP:RNA</b> | FBgn0046696 | FBtr0085775                                                                                                                                                                                                                                     | 364    | 111   | 5,77067E-21  | <b>1,71338</b>  |
| <b>RpS6</b>       | FBgn0261592 | FBtr0071135                                                                                                                                                                                                                                     | 20267  | 6147  | 0            | <b>1,72118</b>  |
| <b>CG42574</b>    | FBgn0260794 | FBtr0303914                                                                                                                                                                                                                                     | 1016   | 308   | 9,88814E-58  | <b>1,72190</b>  |
| <b>CG15523</b>    | FBgn0039727 | FBtr0085505,FBtr0300825                                                                                                                                                                                                                         | 440    | 133   | 1,29931E-25  | <b>1,72608</b>  |
| <b>RpS6</b>       | FBgn0261136 | FBtr0071136                                                                                                                                                                                                                                     | 20076  | 6034  | 0            | <b>1,73429</b>  |
| <b>Megalin</b>    | FBgn0261260 | FBtr0302153                                                                                                                                                                                                                                     | 16691  | 4974  | 0            | <b>1,74659</b>  |
| <b>RpS23</b>      | FBgn0033912 | FBtr0087575                                                                                                                                                                                                                                     | 56586  | 16835 | 0            | <b>1,74898</b>  |
| <b>CG2310</b>     | FBgn0039665 | FBtr0085434                                                                                                                                                                                                                                     | 585    | 174   | 1,81391E-34  | <b>1,74935</b>  |
| <b>CR41540</b>    | FBgn0085797 | FBtr0114251                                                                                                                                                                                                                                     | 649    | 193   | 3,31210E-38  | <b>1,74962</b>  |
| <b>CG7580</b>     | FBgn0036728 | FBtr0075222,FBtr0302509,FBtr0302510                                                                                                                                                                                                             | 1100   | 324   | 3,19133E-85  | <b>1,76344</b>  |
| <b>glo</b>        | FBgn0259139 | FBtr0089918,FBtr0089919                                                                                                                                                                                                                         | 449    | 132   | 3,98137E-27  | <b>1,76618</b>  |
| <b>Mical</b>      | FBgn0053208 | FBtr0082210,FBtr0082211,FBtr0082212,FBtr0082206,FBtr0082207,FBtr0082208,FBtr0082209,FBtr0273185,FBtr0306607,FBtr0306608,FBtr0306609,FBtr0306610                                                                                                 | 1203   | 352   | 6,55911E-72  | <b>1,77299</b>  |
| <b>Mical</b>      | FBgn0053208 | FBtr0082213                                                                                                                                                                                                                                     | 1203   | 352   | 6,55911E-72  | <b>1,77299</b>  |
| <b>RpS30</b>      | FBgn0038834 | FBtr0083970                                                                                                                                                                                                                                     | 1351   | 394   | 5,52606E-81  | <b>1,77776</b>  |
| <b>cher</b>       | FBgn0014141 | FBtr0089471,FBtr0290014                                                                                                                                                                                                                         | 699    | 202   | 6,76225E-43  | <b>1,79094</b>  |
| <b>Hsp70Bbb</b>   | FBgn0051354 | FBtr0082636                                                                                                                                                                                                                                     | 1490   | 425   | 3,83321E-92  | <b>1,80978</b>  |
| <b>Vha68-2</b>    | FBgn0020367 | FBtr0080418                                                                                                                                                                                                                                     | 1183   | 336   | 9,76048E-74  | <b>1,81592</b>  |
| <b>CG1753</b>     | FBgn0031148 | FBtr0077244                                                                                                                                                                                                                                     | 346    | 98    | 3,12821E-22  | <b>1,81992</b>  |
| <b>Vha68-2</b>    | FBgn0020367 | FBtr0080419                                                                                                                                                                                                                                     | 1180   | 331   | 8,17851E-75  | <b>1,83388</b>  |
| <b>CR34335</b>    | FBgn0085364 | FBtr0307366                                                                                                                                                                                                                                     | 59881  | 16764 | 0            | <b>1,83673</b>  |
| <b>Sp1</b>        | FBgn0020378 | FBtr0071381                                                                                                                                                                                                                                     | 409    | 114   | 1,22853E-26  | <b>1,84307</b>  |
| <b>Sp1</b>        | FBgn0020378 | FBtr0273354                                                                                                                                                                                                                                     | 402    | 112   | 3,14236E-26  | <b>1,84370</b>  |
| <b>nej</b>        | FBgn0261617 | FBtr0302722                                                                                                                                                                                                                                     | 7129   | 1956  | 0            | <b>1,86579</b>  |
| <b>nej</b>        | FBgn0261617 | FBtr0302723,FBtr0071402                                                                                                                                                                                                                         | 7128   | 1955  | 0            | <b>1,86633</b>  |
| <b>trol</b>       | FBgn0261451 | FBtr0305158,FBtr0305159,FBtr0305160,FBtr0305161,FBtr0305167,FBtr0305168,FBtr0305169,FBtr0305170,FBtr0305171,FBtr0305172,FBtr0305173,FBtr0305174,FBtr0305175                                                                                     | 909    | 249   | 1,15029E-59  | <b>1,86813</b>  |
| <b>CR41583</b>    | FBgn0085805 | FBtr0114259                                                                                                                                                                                                                                     | 278    | 75    | 3,65309E-19  | <b>1,89012</b>  |
| <b>Tim10</b>      | FBgn0027360 | FBtr0071676                                                                                                                                                                                                                                     | 2727   | 732   | 1,88149E-182 | <b>1,89740</b>  |
| <b>Tim10</b>      | FBgn0027360 | FBtr0071677                                                                                                                                                                                                                                     | 2666   | 713   | 3,03812E-179 | <b>1,90270</b>  |
| <b>l(2)03659</b>  | FBgn0010549 | FBtr0302504                                                                                                                                                                                                                                     | 792    | 209   | 1,15172E-54  | <b>1,92200</b>  |
| <b>sis</b>        | FBgn0086906 | FBtr0072848,FBtr0072849                                                                                                                                                                                                                         | 4301   | 1125  | 2,75893E-297 | <b>1,93475</b>  |
| <b>CG1746</b>     | FBgn0039830 | FBtr0085774,FBtr0306237                                                                                                                                                                                                                         | 3273   | 832   | 1,54529E-234 | <b>1,97596</b>  |
| <b>CG1746</b>     | FBgn0039830 | FBtr0085772,FBtr0085773,FBtr0305120,FBtr0305121                                                                                                                                                                                                 | 3271   | 830   | 7,90917E-235 | <b>1,97855</b>  |
| <b>RpL32</b>      | FBgn0002626 | FBtr0085594                                                                                                                                                                                                                                     | 11065  | 2806  | 0            | <b>1,97942</b>  |
| <b>RpL32</b>      | FBgn0002626 | FBtr0085592,FBtr0085593,FBtr0114555,FBtr0114556                                                                                                                                                                                                 | 11065  | 2805  | 0            | <b>1,97993</b>  |
| <b>mRpL33</b>     | FBgn0040907 | FBtr0070655                                                                                                                                                                                                                                     | 701    | 177   | 3,09869E-51  | <b>1,98567</b>  |
| <b>Jon65Aiv</b>   | FBgn0250815 | FBtr0077040                                                                                                                                                                                                                                     | 5615   | 5     | 0            | <b>10,13310</b> |
| <b>CG30031</b>    | FBgn0050031 | FBtr0088123                                                                                                                                                                                                                                     | 1877   | 1     | 0            | <b>10,87420</b> |
| <b>Jon65Aiii</b>  | FBgn0035665 | FBtr0077041                                                                                                                                                                                                                                     | 4035   | 2     | 0            | <b>10,97840</b> |
| <b>dikar</b>      | FBgn0261934 | FBtr0303748,FBtr0303749,FBtr0303750,FBtr0303751                                                                                                                                                                                                 | 658    | 164   | 8,63195E-49  | <b>2,00439</b>  |
| <b>kis</b>        | FBgn0086902 | FBtr0078144,FBtr0299837                                                                                                                                                                                                                         | 23745  | 5823  | 0            | <b>2,02779</b>  |
| <b>rg</b>         | FBgn0086911 | FBtr0070745,FBtr0110993,FBtr0290088,FBtr0299588                                                                                                                                                                                                 | 419    | 101   | 1,22908E-32  | <b>2,05259</b>  |
| <b>CG7834</b>     | FBgn0039697 | FBtr0085536                                                                                                                                                                                                                                     | 645    | 155   | 5,81319E-50  | <b>2,05703</b>  |
| <b>CG7834</b>     | FBgn0039697 | FBtr0085535                                                                                                                                                                                                                                     | 661    | 158   | 1,88600E-51  | <b>2,06473</b>  |
| <b>rno</b>        | FBgn0035106 | FBtr0072532,FBtr0305548,FBtr0305549                                                                                                                                                                                                             | 1413   | 336   | 8,51227E-110 | <b>2,07223</b>  |
| <b>Mhc</b>        | FBgn0086783 | FBtr0080895,FBtr0080896,FBtr0080897,FBtr0080898,FBtr0080899,FBtr0080900,FBtr0080901,FBtr0080902,FBtr0080903,FBtr0080905,FBtr0080906,FBtr0080907,FBtr0301827,FBtr0301828,FBtr0301829,FBtr0307492,FBtr0307493,FBtr0307494,FBtr0307495,FBtr0307496 | 461    | 109   | 1,51503E-36  | <b>2,08044</b>  |
| <b>CG5527</b>     | FBgn0039564 | FBtr0085255                                                                                                                                                                                                                                     | 683    | 158   | 5,07519E-55  | <b>2,11196</b>  |
| <b>stan</b>       | FBgn0024836 | FBtr0303223,FBtr0304899,FBtr0304900                                                                                                                                                                                                             | 2038   | 471   | 4,54002E-163 | <b>2,11336</b>  |
| <b>RpL9</b>       | FBgn0015756 | FBtr0080164                                                                                                                                                                                                                                     | 5422   | 1250  | 0            | <b>2,11690</b>  |
| <b>RpL9</b>       | FBgn0015756 | FBtr0080163                                                                                                                                                                                                                                     | 5366   | 1230  | 0            | <b>2,12519</b>  |
| <b>RpL27</b>      | FBgn0039359 | FBtr0084932                                                                                                                                                                                                                                     | 115859 | 26028 | 0            | <b>2,15423</b>  |
| <b>Obp83g</b>     | FBgn0046875 | FBtr0078617                                                                                                                                                                                                                                     | 237    | 53    | 2,65578E-20  | <b>2,16082</b>  |
| <b>CR40677</b>    | FBgn0085765 | FBtr0114215                                                                                                                                                                                                                                     | 272    | 59    | 7,58356E-24  | <b>2,20482</b>  |
| <b>stan</b>       | FBgn0024836 | FBtr0088214,FBtr0300578                                                                                                                                                                                                                         | 1717   | 369   | 2,24361E-148 | <b>2,21820</b>  |
| <b>CR40560</b>    | FBgn0085743 | FBtr0114193                                                                                                                                                                                                                                     | 512    | 110   | 9,16523E-45  | <b>2,21864</b>  |
| <b>trol</b>       | FBgn0261451 | FBtr0091965,FBtr0305158,FBtr0305159,FBtr0305160,FBtr0305161,FBtr0305162,FBtr0305164,FBtr0305170,FBtr0305171,FBtr0305172,FBtr0305173,FBtr0305174,FBtr0305175,FBtr0305176                                                                         | 317    | 67    | 2,41028E-28  | <b>2,24225</b>  |
| <b>Pdsw</b>       | FBgn0021967 | FBtr0077521                                                                                                                                                                                                                                     | 239    | 50    | 9,43386E-22  | <b>2,25701</b>  |
| <b>CR41544</b>    | FBgn0085799 | FBtr0114253                                                                                                                                                                                                                                     | 763    | 157   | 4,48760E-69  | <b>2,28092</b>  |
| <b>CG13731</b>    | FBgn0036717 | FBtr0306800                                                                                                                                                                                                                                     | 317    | 65    | 2,76307E-29  | <b>2,28597</b>  |
| <b>Doa</b>        | FBgn0259220 | FBtr0299751                                                                                                                                                                                                                                     | 1914   | 391   | 1,17758E-173 | <b>2,29135</b>  |
| <b>dp</b>         | FBgn0053196 | FBtr0290006,FBtr0305136,FBtr0305137,FBtr0305138,FBtr0305139,FBtr0305140,FBtr0305141,FBtr0305142,FBtr0305143,FBtr0305144,FBtr0305145,FBtr0305146                                                                                                 | 24449  | 4829  | 0            | <b>2,33998</b>  |
| <b>CR40639</b>    | FBgn0085758 | FBtr0114208                                                                                                                                                                                                                                     | 872    | 171   | 1,44483E-82  | <b>2,35033</b>  |
| <b>RpL31</b>      | FBgn0025286 | FBtr0088525                                                                                                                                                                                                                                     | 22162  | 4332  | 0            | <b>2,35498</b>  |
| <b>LBR</b>        | FBgn0034657 | FBtr0071711                                                                                                                                                                                                                                     | 277    | 54    | 7,16803E-27  | <b>2,35885</b>  |
| <b>RpL31</b>      | FBgn0025286 | FBtr0088526,FBtr0088527                                                                                                                                                                                                                         | 22083  | 4294  | 0            | <b>2,36254</b>  |
| <b>RpL31</b>      | FBgn0025286 | FBtr0088527                                                                                                                                                                                                                                     | 47798  | 9249  | 0            | <b>2,36958</b>  |
| <b>RpL31</b>      | FBgn0025286 | FBtr0088526,FBtr0088525                                                                                                                                                                                                                         | 47797  | 9247  | 0            | <b>2,36986</b>  |
| <b>spen</b>       | FBgn0016977 | FBtr0078122                                                                                                                                                                                                                                     | 326    | 63    | 1,35009E-31  | <b>2,37145</b>  |
| <b>spen</b>       | FBgn0016977 | FBtr0078121,FBtr0306341                                                                                                                                                                                                                         | 326    | 63    | 1,35009E-31  | <b>2,37145</b>  |
| <b>CR40642</b>    | FBgn0085761 | FBtr0114211                                                                                                                                                                                                                                     | 839    | 159   | 8,87050E-82  | <b>2,39964</b>  |
| <b>trol</b>       | FBgn0261451 | FBtr0305158,FBtr0305159,FBtr0305160,FBtr0305161,FBtr0305163,FBtr0305167,FBtr0305168,FBtr0305169,FBtr0305170,FBtr0305171,FBtr0305172,FBtr0305173,FBtr0305174,FBtr0305175                                                                         | 860    | 159   | 1,03851E-85  | <b>2,43531</b>  |
| <b>CR40640</b>    | FBgn0085759 | FBtr0114209                                                                                                                                                                                                                                     | 808    | 149   | 1,35899E-80  | <b>2,43904</b>  |
| <b>CR40641</b>    | FBgn0085760 | FBtr0114210                                                                                                                                                                                                                                     | 857    | 158   | 1,52143E-85  | <b>2,43937</b>  |
| <b>CG7580</b>     | FBgn0036728 | FBtr0075222,FBtr0302510                                                                                                                                                                                                                         | 3336   | 604   | 0            | <b>2,46550</b>  |

|                       |             |                                                                                                                                                                                                                                                                                     |      |      |              |          |
|-----------------------|-------------|-------------------------------------------------------------------------------------------------------------------------------------------------------------------------------------------------------------------------------------------------------------------------------------|------|------|--------------|----------|
| <b>CG7580</b>         | FBgn0036728 | Fbtr0302509                                                                                                                                                                                                                                                                         | 3937 | 678  | 0            | 2,53774  |
| <b>CR41539</b>        | FBgn0085796 | Fbtr0114250                                                                                                                                                                                                                                                                         | 1050 | 179  | 1,43038E-111 | 2,55236  |
| <b>Doa</b>            | FBgn0259220 | Fbtr0299743                                                                                                                                                                                                                                                                         | 659  | 111  | 5,85723E-71  | 2,56972  |
| <b>CR41613</b>        | FBgn0085822 | Fbtr0114280                                                                                                                                                                                                                                                                         | 865  | 143  | 4,27492E-94  | 2,59668  |
| <b>shot</b>           | FBgn0013733 | Fbtr0087617,Fbtr0087619,Fbtr0087616,<br>Fbtr0273222,Fbtr0273223,Fbtr0273224,<br>Fbtr0273225,Fbtr0273226,Fbtr0301591,<br>Fbtr0301592,Fbtr0301593,Fbtr0304847,<br>Fbtr0304848,Fbtr0304849,Fbtr0304850,<br>Fbtr0304851,Fbtr0304852,Fbtr0304853                                         | 301  | 49   | 1,33127E-33  | 2,61891  |
| <b>Msp-300</b>        | FBgn0261836 | Fbtr0303383,Fbtr0303385,Fbtr0303388,<br>Fbtr0303389                                                                                                                                                                                                                                 | 1211 | 196  | 9,03802E-134 | 2,62727  |
| <b>CG5021</b>         | FBgn0035944 | Fbtr0301140                                                                                                                                                                                                                                                                         | 266  | 42   | 1,89011E-30  | 2,66297  |
| <b>CG5021</b>         | FBgn0035944 | Fbtr0076514                                                                                                                                                                                                                                                                         | 266  | 42   | 1,89011E-30  | 2,66297  |
| <b>CG5021</b>         | FBgn0035944 | Fbtr0076513,Fbtr0301139                                                                                                                                                                                                                                                             | 266  | 42   | 1,89011E-30  | 2,66297  |
| <b>dp</b>             | FBgn0053196 | Fbtr0290006,Fbtr0305136,Fbtr0305137,<br>Fbtr0305138,Fbtr0305139,Fbtr0305140,<br>Fbtr0305141,Fbtr0305143,Fbtr0305144,<br>Fbtr0305145,Fbtr0305146                                                                                                                                     | 1069 | 165  | 3,63714E-122 | 2,69572  |
| <b>CR40766</b>        | FBgn0085773 | Fbtr0114223                                                                                                                                                                                                                                                                         | 576  | 86   | 9,73860E-68  | 2,74366  |
| <b>LBR</b>            | FBgn0034657 | Fbtr0071712                                                                                                                                                                                                                                                                         | 255  | 38   | 2,93383E-30  | 2,74643  |
| <b>RpS19a</b>         | FBgn0010412 | Fbtr0074313                                                                                                                                                                                                                                                                         | 5172 | 770  | 0            | 2,74779  |
| <b>Msp-300</b>        | FBgn0261836 | Fbtr0303384                                                                                                                                                                                                                                                                         | 8863 | 1318 | 0            | 2,74944  |
| <b>CR40668</b>        | FBgn0085764 | Fbtr0114214                                                                                                                                                                                                                                                                         | 1273 | 189  | 1,84661E-149 | 2,75177  |
| <b>Msp-300</b>        | FBgn0261836 | Fbtr0303387                                                                                                                                                                                                                                                                         | 8847 | 1307 | 0            | 2,75893  |
| <b>CR41535</b>        | FBgn0085795 | Fbtr0114249                                                                                                                                                                                                                                                                         | 1557 | 220  | 1,13033E-188 | 2,82319  |
| <b>shot</b>           | FBgn0013733 | Fbtr0087621                                                                                                                                                                                                                                                                         | 2321 | 309  | 6,23090E-292 | 2,90907  |
| <b>shot</b>           | FBgn0013733 | Fbtr0301964,Fbtr0087621,Fbtr0087617,<br>Fbtr0087618,Fbtr0087619,Fbtr0087620,<br>Fbtr0087616,Fbtr0273222,Fbtr0273223,<br>Fbtr0273224,Fbtr0273225,Fbtr0273226,<br>Fbtr0301591,Fbtr0301592,Fbtr0301593,<br>Fbtr0304847,Fbtr0304848,Fbtr0304849,<br>Fbtr0304850,Fbtr0304852,Fbtr0304853 | 3476 | 451  | 0            | 2,94623  |
| <b>shot</b>           | FBgn0013733 | Fbtr0087617,Fbtr0087618,Fbtr0087619,<br>Fbtr0087616,Fbtr0273222,Fbtr0273223,<br>Fbtr0273224,Fbtr0273225,Fbtr0273226,<br>Fbtr0301591,Fbtr0301592,Fbtr0304849,<br>Fbtr0304850                                                                                                         | 218  | 27   | 4,71026E-29  | 3,01330  |
| <b>CG7580</b>         | FBgn0036728 | Fbtr0075222                                                                                                                                                                                                                                                                         | 601  | 74   | 2,13652E-79  | 3,02177  |
| <b>CG7580</b>         | FBgn0036728 | Fbtr0302510                                                                                                                                                                                                                                                                         | 601  | 74   | 2,13652E-79  | 3,02177  |
| <b>RpS19a</b>         | FBgn0010412 | Fbtr0074312,Fbtr0074311                                                                                                                                                                                                                                                             | 4923 | 576  | 0            | 3,09540  |
| <b>dp</b>             | FBgn0053196 | Fbtr0290006,Fbtr0305136,Fbtr0305138,<br>Fbtr0305139,Fbtr0305140,Fbtr0305141,<br>Fbtr0305142,Fbtr0305143,Fbtr0305144,<br>Fbtr0305146                                                                                                                                                 | 481  | 56   | 8,38778E-66  | 3,10254  |
| <b>CG6793</b>         | FBgn0036242 | Fbtr0076051                                                                                                                                                                                                                                                                         | 153  | 17   | 7,82312E-22  | 3,16992  |
| <b>7SLRNA:CR42652</b> | FBgn0261504 | Fbtr0302398                                                                                                                                                                                                                                                                         | 397  | 44   | 9,97671E-56  | 3,17356  |
| <b>CG34227</b>        | FBgn0085256 | Fbtr0112420                                                                                                                                                                                                                                                                         | 151  | 16   | 5,97235E-22  | 3,23840  |
| <b>Lcp4</b>           | FBgn0002535 | Fbtr0088744                                                                                                                                                                                                                                                                         | 549  | 58   | 7,46502E-79  | 3,24268  |
| <b>Lcp2</b>           | FBgn0002533 | Fbtr0088761                                                                                                                                                                                                                                                                         | 541  | 57   | 1,28545E-77  | 3,24659  |
| <b>CG42500</b>        | FBgn0260226 | Fbtr0300627                                                                                                                                                                                                                                                                         | 304  | 32   | 7,16354E-44  | 3,24793  |
| <b>CR41609</b>        | FBgn0085819 | Fbtr0114277                                                                                                                                                                                                                                                                         | 639  | 66   | 1,10696E-92  | 3,27528  |
| <b>CR40546</b>        | FBgn0085742 | Fbtr0114192                                                                                                                                                                                                                                                                         | 1289 | 133  | 2,05515E-186 | 3,27675  |
| <b>CR40596</b>        | FBgn0085753 | Fbtr0114203                                                                                                                                                                                                                                                                         | 1377 | 137  | 1,52824E-202 | 3,32928  |
| <b>Msp-300</b>        | FBgn0261836 | Fbtr0303383,Fbtr0303384,Fbtr0303385,<br>Fbtr0303386,Fbtr0303387,Fbtr0303388,<br>Fbtr0303389                                                                                                                                                                                         | 770  | 76   | 5,32955E-114 | 3,34079  |
| <b>CG32249</b>        | FBgn0052249 | Fbtr0303003                                                                                                                                                                                                                                                                         | 124  | 12   | 5,98986E-19  | 3,36923  |
| <b>7SLRNA:CR32864</b> | FBgn0000003 | Fbtr0081624                                                                                                                                                                                                                                                                         | 594  | 57   | 3,69132E-89  | 3,38143  |
| <b>CG31676</b>        | FBgn0051676 | Fbtr0081424                                                                                                                                                                                                                                                                         | 168  | 16   | 1,26871E-25  | 3,39232  |
| <b>Msp-300</b>        | FBgn0261836 | Fbtr0303383,Fbtr0303385                                                                                                                                                                                                                                                             | 148  | 14   | 9,40593E-23  | 3,40210  |
| <b>shot</b>           | FBgn0013733 | Fbtr0087617,Fbtr0087616,Fbtr0273222,<br>Fbtr0273223,Fbtr0273224,Fbtr0301591,<br>Fbtr0304849,Fbtr0304850                                                                                                                                                                             | 245  | 21   | 6,66763E-39  | 3,54432  |
| <b>zye</b>            | FBgn0036985 | Fbtr0078191                                                                                                                                                                                                                                                                         | 199  | 17   | 9,68261E-32  | 3,54916  |
| <b>RpS4</b>           | FBgn0011284 | Fbtr0075884                                                                                                                                                                                                                                                                         | 970  | 82   | 2,32340E-153 | 3,56429  |
| <b>shot</b>           | FBgn0013733 | Fbtr0087618,Fbtr0087619,Fbtr0273225,<br>Fbtr0273226,Fbtr0301592                                                                                                                                                                                                                     | 363  | 28   | 1,30971E-59  | 3,69647  |
| <b>CG11854</b>        | FBgn0039299 | Fbtr0084811                                                                                                                                                                                                                                                                         | 124  | 9    | 3,20425E-21  | 3,78427  |
| <b>Sgs3</b>           | FBgn0003373 | Fbtr0076096                                                                                                                                                                                                                                                                         | 131  | 9    | 1,29458E-22  | 3,86350  |
| <b>RpS4</b>           | FBgn0011284 | Fbtr0075885                                                                                                                                                                                                                                                                         | 911  | 62   | 5,90811E-156 | 3,87711  |
| <b>dp</b>             | FBgn0053196 | Fbtr0290006,Fbtr0305136,Fbtr0305137,<br>Fbtr0305138,Fbtr0305139,Fbtr0305141,<br>Fbtr0305142,Fbtr0305143,Fbtr0305144,<br>Fbtr0305146                                                                                                                                                 | 407  | 25   | 2,48580E-72  | 4,02503  |
| <b>dp</b>             | FBgn0053196 | Fbtr0290006,Fbtr0305136,Fbtr0305137,<br>Fbtr0305138,Fbtr0305139,Fbtr0305140,<br>Fbtr0305143,Fbtr0305146                                                                                                                                                                             | 345  | 21   | 1,46952E-61  | 4,03814  |
| <b>Obp56d</b>         | FBgn0034470 | Fbtr0086477                                                                                                                                                                                                                                                                         | 284  | 16   | 7,19216E-52  | 4,14975  |
| <b>fzo</b>            | FBgn0011596 | Fbtr0084399                                                                                                                                                                                                                                                                         | 125  | 7    | 5,78661E-23  | 4,15843  |
| <b>dp</b>             | FBgn0053196 | Fbtr0290006,Fbtr0305136,Fbtr0305137,<br>Fbtr0305138,Fbtr0305139,Fbtr0305140,<br>Fbtr0305141,Fbtr0305142,Fbtr0305143,<br>Fbtr0305144                                                                                                                                                 | 2921 | 157  | 0            | 4,21763  |
| <b>Lcp1</b>           | FBgn0002531 | Fbtr0088763                                                                                                                                                                                                                                                                         | 1190 | 63   | 8,83966E-220 | 4,23947  |
| <b>dp</b>             | FBgn0053196 | Fbtr0290006,Fbtr0305136,Fbtr0305137,<br>Fbtr0305138,Fbtr0305139,Fbtr0305140,<br>Fbtr0305144,Fbtr0305146                                                                                                                                                                             | 495  | 26   | 7,91398E-92  | 4,25084  |
| <b>CG13323</b>        | FBgn0033788 | Fbtr0087797                                                                                                                                                                                                                                                                         | 1012 | 53   | 1,71492E-187 | 4,25507  |
| <b>Lcp3</b>           | FBgn0002534 | Fbtr0088743                                                                                                                                                                                                                                                                         | 401  | 21   | 1,85618E-74  | 4,25514  |
| <b>RNaseMRP:RNA</b>   | FBgn0065098 | Fbtr0091662                                                                                                                                                                                                                                                                         | 505  | 11   | 1,10730E-110 | 5,52071  |
| <b>Jon25Bii</b>       | FBgn0031654 | Fbtr0079055                                                                                                                                                                                                                                                                         | 384  | 6    | 2,09111E-87  | 6        |
| <b>CG8987</b>         | FBgn0028920 | Fbtr0080563                                                                                                                                                                                                                                                                         | 464  | 6    | 1,76286E-107 | 6,27302  |
| <b>CG7953</b>         | FBgn0028533 | Fbtr0080550                                                                                                                                                                                                                                                                         | 559  | 4    | 1,12901E-134 | 7,12670  |
| <b>CG14302</b>        | FBgn0038647 | Fbtr0083673                                                                                                                                                                                                                                                                         | 199  | 1    | 1,07591E-48  | 7,63662  |
| <b>CG12115</b>        | FBgn0030097 | Fbtr0071341                                                                                                                                                                                                                                                                         | 203  | 1    | 9,78933E-50  | 7,66534  |
| <b>CG33346</b>        | FBgn0053346 | Fbtr0302527                                                                                                                                                                                                                                                                         | 432  | 2    | 4,93881E-106 | 7,75489  |
| <b>CG13324</b>        | FBgn0033789 | Fbtr0087796                                                                                                                                                                                                                                                                         | 233  | 1    | 2,81714E-57  | 7,86419  |
| <b>CG8664</b>         | FBgn0030836 | Fbtr0074445                                                                                                                                                                                                                                                                         | 591  | 2    | 2,43871E-146 | 8,20701  |
| <b>yip7</b>           | FBgn0040060 | Fbtr0077038                                                                                                                                                                                                                                                                         | 1014 | 2    | 1,82092E-254 | 8,98584  |
| <b>CG30025</b>        | FBgn0050025 | Fbtr0088158                                                                                                                                                                                                                                                                         | 919  | 1    | 1,66024E-232 | 9,84392  |
| <b>CG10912</b>        | FBgn0034296 | Fbtr0086807                                                                                                                                                                                                                                                                         | 2431 | 0    | 0            | Infinity |

|                 |             |                                     |      |   |              |          |
|-----------------|-------------|-------------------------------------|------|---|--------------|----------|
| <b>Jon25Bi</b>  | FBgn0020906 | FBtr0079054                         | 627  | 0 | 4,81400E-160 | Infinity |
| <b>CG42834</b>  | FBgn0262023 | FBtr0303853                         | 99   | 0 | 3,91641E-25  | Infinity |
| <b>Jon25Bi</b>  | FBgn0020906 | FBtr0100432                         | 627  | 0 | 4,81400E-160 | Infinity |
| <b>betaTry</b>  | FBgn0010357 | FBtr0088122                         | 77   | 0 | 1,61178E-19  | Infinity |
| <b>gammaTry</b> | FBgn0010359 | FBtr0088159                         | 853  | 0 | 2,70298E-218 | Infinity |
| <b>Phae1</b>    | FBgn0263234 | FBtr0080334                         | 106  | 0 | 1,11263E-26  | Infinity |
| <b>CG31789</b>  | FBgn0051789 | FBtr0081071                         | 523  | 0 | 1,28207E-133 | Infinity |
| <b>fu12</b>     | FBgn0026718 | FBtr0079703,FBtr0079704,FBtr0302160 | 131  | 0 | 3,39076E-33  | Infinity |
| <b>Mur29B</b>   | FBgn0051901 | FBtr0079607                         | 245  | 0 | 2,68673E-62  | Infinity |
| <b>dro2</b>     | FBgn0052279 | FBtr0073059                         | 348  | 0 | 9,41430E-89  | Infinity |
| <b>CG32302</b>  | FBgn0052302 | FBtr0072881                         | 875  | 0 | 5,91697E-224 | Infinity |
| <b>CG33333</b>  | FBgn0053333 | FBtr0083441                         | 251  | 0 | 6,34766E-64  | Infinity |
| <b>alphaTry</b> | FBgn0003863 | FBtr0088161                         | 398  | 0 | 1,96420E-101 | Infinity |
| <b>CG8661</b>   | FBgn0030837 | FBtr0074444                         | 106  | 0 | 1,11263E-26  | Infinity |
| <b>CG15044</b>  | FBgn0030928 | FBtr0074627                         | 144  | 0 | 2,37484E-36  | Infinity |
| <b>CG14332</b>  | FBgn0038509 | FBtr0083446                         | 142  | 0 | 4,11540E-36  | Infinity |
| <b>CG15818</b>  | FBgn0031910 | FBtr0079442                         | 593  | 0 | 1,84237E-151 | Infinity |
| <b>CG6933</b>   | FBgn0036952 | FBtr0074853,FBtr0074854,FBtr0074855 | 266  | 0 | 1,06148E-67  | Infinity |
| <b>deltaTry</b> | FBgn0010358 | FBtr0088124                         | 1855 | 0 | 0            | Infinity |
| <b>CG7465</b>   | FBgn0035551 | FBtr0073306                         | 1184 | 0 | 2,83852E-303 | Infinity |
