# Supplementary material for: New Partners in Regulation of Gene Expression: The Enhancer of Trithorax and Polycomb Corto Interacts with Methylated Ribosomal Protein L12 Via Its Chromodomain
Source: PubMed Central journal article supplement (PMC3469418; doi:10.1371/journal.pgen.1003006), 2012-10-11
Supplement: pgen.1003006.s010.pdf [file pgen.1003006.s010.pdf]

Table S6

| Flybase Gene Symbol | Flybase ID Genes | Flybase ID Transcripts                                                                                      | Number of read                     |                   | Adjusted P-value | log <sub>2</sub> (FC) |
|---------------------|------------------|-------------------------------------------------------------------------------------------------------------|------------------------------------|-------------------|------------------|-----------------------|
|                     |                  |                                                                                                             | sd:: <i>Gal4&gt;UAS::RpL12-Myc</i> | sd:: <i>Gal4+</i> |                  |                       |
| <i>Ckllbeta</i>     | FBgn000259       | FBtr0308084                                                                                                 | 151                                | 302               | 4,25264E-20      | -1                    |
| <i>Tao-1</i>        | FBgn0031030      | FBtr0303999                                                                                                 | 1664                               | 3330              | 5,16696E-213     | -1,00087              |
| <i>eyg</i>          | FBgn000625       | FBtr0100170                                                                                                 | 241                                | 483               | 1,41536E-31      | -1,00299              |
| <i>CG14464</i>      | FBgn0033000      | FBtr0299923                                                                                                 | 771                                | 1546              | 1,48315E-99      | -1,00374              |
| <i>elF-4a</i>       | FBgn0001942      | FBtr0079176                                                                                                 | 6582                               | 13214             | 0                | -1,00547              |
| <i>Sh3beta</i>      | FBgn0035772      | FBtr0076873,FBtr0302547,FBtr0302548                                                                         | 1276                               | 2566              | 1,35724E-165     | -1,00789              |
| <i>Pkn</i>          | FBgn0020621      | FBtr0088601,FBtr0088603,FBtr0088604,FBtr0088605,FBtr0302604,FBtr0112897,FBtr0301511                         | 1305                               | 2625              | 1,62687E-169     | -1,00827              |
| <i>gro</i>          | FBgn0001139      | FBtr0084962,FBtr0084963,FBtr0084964,FBtr0084965,FBtr0084966,FBtr0302951,FBtr0302952                         | 953                                | 1919              | 2,54324E-124     | -1,00981              |
| <i>CG13025</i>      | FBgn0036660      | FBtr0075346                                                                                                 | 736                                | 1486              | 6,14527E-97      | -1,01366              |
| <i>CG6084</i>       | FBgn0086254      | FBtr0076139                                                                                                 | 285                                | 576               | 3,98708E-38      | -1,01511              |
| <i>Tsp42Ea</i>      | FBgn0029508      | FBtr0086171,FBtr0086172,FBtr0086173                                                                         | 183                                | 370               | 9,90642E-25      | -1,01568              |
| <i>CG6091</i>       | FBgn0036180      | FBtr0273305,FBtr0273306                                                                                     | 264                                | 534               | 1,72904E-35      | -1,01630              |
| <i>gish</i>         | FBgn0250823      | FBtr0301304,FBtr0083262,FBtr0083261,FBtr0083264,FBtr0100331,FBtr0100332,FBtr0100333,FBtr0305071,FBtr0305072 | 170                                | 344               | 4,73567E-23      | -1,01687              |
| <i>Pur-alpha</i>    | FBgn0022361      | FBtr0089995,FBtr0089993                                                                                     | 201                                | 407               | 2,77302E-27      | -1,01783              |
| <i>Pur-alpha</i>    | FBgn0022361      | FBtr0089996,FBtr0089994                                                                                     | 200                                | 405               | 4,90691E-27      | -1,01782              |
| <i>mask</i>         | FBgn0043884      | FBtr0084563                                                                                                 | 1369                               | 2774              | 2,21313E-181     | -1,01885              |
| <i>CG17698</i>      | FBgn0040056      | FBtr0111166,FBtr0111168,FBtr0111167                                                                         | 568                                | 1152              | 6,90771E-76      | -1,02018              |
| <i>mRpS21</i>       | FBgn0044511      | FBtr0082764                                                                                                 | 200                                | 406               | 2,33562E-27      | -1,02148              |
| <i>CG7337</i>       | FBgn0031374      | FBtr0077811,FBtr0110882,FBtr0110883,FBtr0113011                                                             | 232                                | 471               | 1,62174E-31      | -1,02160              |
| <i>elF-4a</i>       | FBgn0001942      | FBtr0079178                                                                                                 | 6666                               | 13540             | 0                | -1,02233              |
| <i>gus</i>          | FBgn0026238      | FBtr0089755,FBtr0089752,FBtr0089754,FBtr0089753,FBtr0089756                                                 | 192                                | 390               | 2,97285E-26      | -1,02237              |
| <i>vtd</i>          | FBgn0260987      | FBtr0113746                                                                                                 | 1837                               | 3736              | 1,64579E-245     | -1,02414              |
| <i>alph</i>         | FBgn0086361      | FBtr0085443                                                                                                 | 1613                               | 3283              | 3,94811E-216     | -1,02527              |
| <i>CG4662</i>       | FBgn0038735      | FBtr0083814                                                                                                 | 138                                | 281               | 3,03576E-19      | -1,02590              |
| <i>ltp</i>          | FBgn0035023      | FBtr0300187,FBtr0290219                                                                                     | 508                                | 1035              | 1,01188E-68      | -1,02673              |
| <i>CG42342</i>      | FBgn0259244      | FBtr0299895,FBtr0299897                                                                                     | 158                                | 322               | 5,91379E-22      | -1,02714              |
| <i>4EHP</i>         | FBgn0053100      | FBtr0300475,FBtr0303159                                                                                     | 179                                | 365               | 9,71646E-25      | -1,02794              |
| <i>lmp</i>          | FBgn0262735      | FBtr0305150                                                                                                 | 3339                               | 6817              | 0                | -1,02972              |
| <i>Cf2</i>          | FBgn000286       | FBtr0089647,FBtr0089648,FBtr0089649                                                                         | 543                                | 1111              | 2,97210E-74      | -1,03283              |
| <i>CG13360</i>      | FBgn0025620      | FBtr0070147                                                                                                 | 152                                | 311               | 2,56838E-21      | -1,03284              |
| <i>Csk</i>          | FBgn0262081      | FBtr0299728,FBtr0300548,FBtr0300546,FBtr0300547,FBtr0300549                                                 | 1521                               | 3114              | 4,36575E-207     | -1,03375              |
| <i>Nedd4</i>        | FBgn0259174      | FBtr0299642,FBtr0299645,FBtr0299647,FBtr0300519                                                             | 676                                | 1384              | 2,18570E-92      | -1,03375              |
| <i>CG31121</i>      | FBgn0051121      | FBtr0084723                                                                                                 | 285                                | 584               | 2,00509E-39      | -1,03501              |
| <i>eyg</i>          | FBgn000625       | FBtr0075979                                                                                                 | 243                                | 498               | 7,58304E-34      | -1,03519              |
| <i>CG4612</i>       | FBgn0035016      | FBtr0306136                                                                                                 | 3326                               | 6819              | 0                | -1,03577              |
| <i>Sdc</i>          | FBgn0010415      | FBtr0273207,FBtr0305897                                                                                     | 4229                               | 8671              | 0                | -1,03588              |
| <i>CG4768</i>       | FBgn0030790      | FBtr0074332                                                                                                 | 523                                | 1073              | 5,00838E-72      | -1,03677              |
| <i>Ranbp16</i>      | FBgn0053180      | FBtr0303646                                                                                                 | 187                                | 384               | 2,36964E-26      | -1,03807              |
| <i>CG6700</i>       | FBgn0032305      | FBtr0301710                                                                                                 | 1168                               | 2400              | 1,10371E-160     | -1,03899              |
| <i>bbg</i>          | FBgn0087007      | FBtr0273424,FBtr0273425,FBtr0273426                                                                         | 145                                | 298               | 1,32010E-20      | -1,03926              |
| <i>Bsg</i>          | FBgn0261822      | FBtr0079570,FBtr0079574,FBtr0079567,FBtr0079566                                                             | 459                                | 944               | 9,72579E-64      | -1,04029              |
| <i>CG15535</i>      | FBgn0039764      | FBtr0085629                                                                                                 | 138                                | 284               | 9,87170E-20      | -1,04122              |
| <i>qkr54B</i>       | FBgn0022987      | FBtr0086923,FBtr0086925                                                                                     | 133                                | 274               | 3,54544E-19      | -1,04275              |
| <i>CaMKI</i>        | FBgn0016126      | FBtr0089069,FBtr0089063,FBtr0089064,FBtr0089065,FBtr0089066,FBtr0089067,FBtr0089068                         | 2301                               | 4751              | 4,7632E-320      | -1,04597              |
| <i>Ckllalpha</i>    | FBgn0015024      | FBtr0073680,FBtr0300380                                                                                     | 845                                | 1745              | 5,89448E-118     | -1,04620              |
| <i>CG4612</i>       | FBgn0035016      | FBtr0306137                                                                                                 | 3394                               | 7019              | 0                | -1,04828              |
| <i>Silk</i>         | FBgn0046692      | FBtr0111111                                                                                                 | 899                                | 1860              | 3,86625E-126     | -1,04891              |
| <i>R</i>            | FBgn0004636      | FBtr0072867,FBtr0303154                                                                                     | 5599                               | 11589             | 0                | -1,04952              |
| <i>Sdc</i>          | FBgn0010415      | FBtr0071706,FBtr0071705,FBtr0273206,FBtr0273207                                                             | 465                                | 964               | 5,25968E-66      | -1,05180              |
| <i>CG8949</i>       | FBgn0030812      | FBtr0074412,FBtr0304839                                                                                     | 1469                               | 3046              | 7,80014E-207     | -1,05208              |
| <i>Sdc</i>          | FBgn0010415      | FBtr0071707,FBtr0301557                                                                                     | 466                                | 968               | 1,98752E-66      | -1,05468              |
| <i>mub</i>          | FBgn0262737      | FBtr0304980                                                                                                 | 4130                               | 8594              | 0                | -1,05719              |
| <i>E2f</i>          | FBgn0011766      | FBtr0084119                                                                                                 | 347                                | 723               | 4,71004E-50      | -1,05906              |
| <i>CG17490</i>      | FBgn0040009      | FBtr0111259                                                                                                 | 340                                | 709               | 3,54907E-49      | -1,06025              |
| <i>CG17883</i>      | FBgn0040005      | FBtr0111291,FBtr0111292                                                                                     | 603                                | 1259              | 7,25742E-87      | -1,06205              |
| <i>CaMKI</i>        | FBgn0016126      | FBtr0089069,FBtr0089066,FBtr0089067,FBtr0089068                                                             | 239                                | 500               | 5,08635E-35      | -1,06492              |
| <i>Haspin</i>       | FBgn0046706      | FBtr0113784                                                                                                 | 954                                | 1996              | 9,74021E-138     | -1,06505              |
| <i>ewg</i>          | FBgn0005427      | FBtr0089441,FBtr0308208,FBtr0308209                                                                         | 720                                | 1508              | 1,96217E-104     | -1,06657              |
| <i>Bsg</i>          | FBgn0261822      | FBtr0079573                                                                                                 | 468                                | 981               | 3,00647E-68      | -1,06774              |
| <i>Scm</i>          | FBgn0003334      | FBtr0082102                                                                                                 | 734                                | 1546              | 5,01310E-108     | -1,07469              |
| <i>Rbp1-like</i>    | FBgn0030479      | FBtr0304001                                                                                                 | 1704                               | 3590              | 6,59884E-250     | -1,07506              |
| <i>Wnt4</i>         | FBgn0010453      | FBtr0089291                                                                                                 | 224                                | 472               | 1,55779E-33      | -1,07529              |
| <i>CG7668</i>       | FBgn0036929      | FBtr0074904,FBtr0074905                                                                                     | 267                                | 563               | 7,36560E-40      | -1,07630              |
| <i>Patronin</i>     | FBgn0263197      | FBtr0300603,FBtr0273447,FBtr0086950,FBtr0300604                                                             | 619                                | 1306              | 1,28358E-91      | -1,07714              |
| <i>nimC2</i>        | FBgn0028939      | FBtr0080589,FBtr0080588                                                                                     | 144                                | 304               | 5,12689E-22      | -1,07800              |
| <i>CG2316</i>       | FBgn0039890      | FBtr0089152                                                                                                 | 204                                | 431               | 7,94365E-31      | -1,07912              |
| <i>fwe</i>          | FBgn0261722      | FBtr0075541                                                                                                 | 225                                | 476               | 4,21292E-34      | -1,08104              |
| <i>csw</i>          | FBgn0000382      | FBtr0070380                                                                                                 | 760                                | 1608              | 4,82866E-113     | -1,08120              |
| <i>l(2)s5379</i>    | FBgn0010704      | FBtr0100673                                                                                                 | 1745                               | 3701              | 1,76400E-260     | -1,08469              |
| <i>kn</i>           | FBgn0001319      | FBtr0112809                                                                                                 | 430                                | 912               | 1,19272E-64      | -1,08470              |
| <i>l(2)s5379</i>    | FBgn0010704      | FBtr0077840                                                                                                 | 1745                               | 3702              | 1,19135E-260     | -1,08508              |
| <i>knrl</i>         | FBgn0001323      | FBtr0078212                                                                                                 | 572                                | 1215              | 3,69085E-86      | -1,08687              |
| <i>Bsg</i>          | FBgn0261822      | FBtr0079568,FBtr0079569,FBtr0079571,FBtr0079572                                                             | 530                                | 1126              | 6,65705E-80      | -1,08714              |
| <i>N</i>            | FBgn0004647      | FBtr0070507                                                                                                 | 2603                               | 5537              | 0                | -1,08893              |
| <i>smg</i>          | FBgn0016070      | FBtr0076550                                                                                                 | 242                                | 515               | 4,22397E-37      | -1,08957              |
| <i>tna</i>          | FBgn0026160      | FBtr0076267                                                                                                 | 942                                | 2005              | 3,33567E-142     | -1,08980              |
| <i>Gef26</i>        | FBgn0021873      | FBtr0300039                                                                                                 | 171                                | 364               | 1,90582E-26      | -1,08994              |
| <i>CG18812</i>      | FBgn0042135      | FBtr0088935,FBtr0088936,FBtr0088937                                                                         | 394                                | 839               | 4,83348E-60      | -1,09048              |

|                      |             |                                                                                                                                                                         |       |       |              |          |
|----------------------|-------------|-------------------------------------------------------------------------------------------------------------------------------------------------------------------------|-------|-------|--------------|----------|
| <i>mp</i>            | FBgn0260660 | FBtr0301105,FBtr0301106,FBtr0301107,FBtr0301108,FBtr0301109,FBtr0301110,FBtr0301111,FBtr0301113,FBtr0301114,FBtr0306638                                                 | 161   | 343   | 5,23325E-25  | -1,09115 |
| <i>cic</i>           | FBgn0262582 | FBtr0305030                                                                                                                                                             | 1618  | 3448  | 1,65213E-244 | -1,09155 |
| <i>Rfabg</i>         | FBgn0087002 | FBtr0089188                                                                                                                                                             | 998   | 2127  | 4,77183E-151 | -1,09171 |
| <i>Cklibeta</i>      | FBgn0000259 | FBtr0307896                                                                                                                                                             | 2782  | 5931  | 0            | -1,09215 |
| <i>CG1180</i>        | FBgn0034528 | FBtr0086254                                                                                                                                                             | 686   | 1463  | 2,42496E-104 | -1,09265 |
| <i>cib</i>           | FBgn0026084 | FBtr0070641,FBtr0307206                                                                                                                                                 | 10104 | 21574 | 0            | -1,09437 |
| <i>Cf2</i>           | FBgn0000286 | FBtr0304887                                                                                                                                                             | 546   | 1166  | 1,72396E-83  | -1,09459 |
| <i>Mmp1</i>          | FBgn0035049 | FBtr0306656                                                                                                                                                             | 418   | 893   | 4,43436E-64  | -1,09516 |
| <i>Sap47</i>         | FBgn0013334 | FBtr0083204,FBtr0083205,FBtr0083206,FBtr0083207,FBtr0083208,FBtr0083209,FBtr0083210,FBtr0301655                                                                         | 897   | 1917  | 6,66569E-137 | -1,09567 |
| <i>rl</i>            | FBgn0003256 | FBtr0113701,FBtr0113702                                                                                                                                                 | 334   | 714   | 2,12481E-51  | -1,09608 |
| <i>unk</i>           | FBgn0004395 | FBtr0305571,FBtr0305572                                                                                                                                                 | 1040  | 2225  | 5,22280E-159 | -1,09722 |
| <i>smg</i>           | FBgn0016070 | FBtr0076551,FBtr0290104                                                                                                                                                 | 242   | 519   | 8,88267E-38  | -1,10073 |
| <i>CG30343</i>       | FBgn0050343 | FBtr0308205                                                                                                                                                             | 221   | 474   | 1,18113E-34  | -1,10084 |
| <i>Sdc</i>           | FBgn0010415 | FBtr0071706,FBtr0071707,FBtr0071705,FBtr0273206,FBtr0273207,FBtr0301557                                                                                                 | 137   | 294   | 7,93932E-22  | -1,10164 |
| <i>jim</i>           | FBgn0027339 | FBtr0078582,FBtr0078581                                                                                                                                                 | 1235  | 2654  | 7,39003E-191 | -1,10366 |
| <i>CG1115</i>        | FBgn0037299 | FBtr0078777,FBtr0305002                                                                                                                                                 | 169   | 364   | 5,69829E-27  | -1,10692 |
| <i>CG5059</i>        | FBgn0037007 | FBtr0078216,FBtr0078217,FBtr0078218,FBtr0078219                                                                                                                         | 1297  | 2794  | 1,04596E-201 | -1,10715 |
| <i>CG18812</i>       | FBgn0042135 | FBtr0306239                                                                                                                                                             | 380   | 819   | 1,14834E-59  | -1,10786 |
| <i>Mmp1</i>          | FBgn0035049 | FBtr0273263,FBtr0304005,FBtr0304008,FBtr0304009,FBtr0304010,FBtr0304011                                                                                                 | 411   | 888   | 6,48101E-65  | -1,11142 |
| <i>PMCA</i>          | FBgn0259214 | FBtr0304050                                                                                                                                                             | 2618  | 5673  | 0            | -1,11565 |
| <i>dbr</i>           | FBgn0067779 | FBtr0078100,FBtr0306537,FBtr0306539                                                                                                                                     | 249   | 540   | 5,10906E-40  | -1,11681 |
| <i>zfh2</i>          | FBgn0004607 | FBtr0307167                                                                                                                                                             | 1034  | 2245  | 3,41884E-164 | -1,11848 |
| <i>CG11486</i>       | FBgn0035397 | FBtr0072998,FBtr0072999,FBtr0073000,FBtr0073001,FBtr0073002,FBtr0073003,FBtr0072991,FBtr0072992,FBtr0113130,FBtr0113131                                                 | 336   | 730   | 5,97164E-54  | -1,11944 |
| <i>akirin</i>        | FBgn0082598 | FBtr0302544                                                                                                                                                             | 4432  | 9640  | 0            | -1,12108 |
| <i>grh</i>           | FBgn0259211 | FBtr0300539                                                                                                                                                             | 2135  | 4644  | 0            | -1,12113 |
| <i>Pi4Kllalpha</i>   | FBgn0037339 | FBtr0078755,FBtr0078756,FBtr0078757                                                                                                                                     | 125   | 272   | 1,42300E-20  | -1,12168 |
| <i>Dsp1</i>          | FBgn0011764 | FBtr0089262,FBtr0289960                                                                                                                                                 | 1923  | 4190  | 1,76311E-307 | -1,12359 |
| <i>Pdk1</i>          | FBgn0020386 | FBtr0072464,FBtr0072465                                                                                                                                                 | 710   | 1548  | 3,46048E-114 | -1,12451 |
| <i>Sh3beta</i>       | FBgn0035772 | FBtr0302548                                                                                                                                                             | 227   | 495   | 5,46115E-37  | -1,12474 |
| <i>mim</i>           | FBgn0053558 | FBtr0302577,FBtr0302578,FBtr0113470,FBtr0302035,FBtr0306614,FBtr0306615,FBtr0306616                                                                                     | 110   | 240   | 2,01466E-18  | -1,12553 |
| <i>Nipped-B</i>      | FBgn0026401 | FBtr0111119,FBtr0111118                                                                                                                                                 | 538   | 1175  | 5,24400E-87  | -1,12698 |
| <i>Eph</i>           | FBgn0025936 | FBtr0301285                                                                                                                                                             | 861   | 1883  | 2,45807E-139 | -1,12895 |
| <i>sdt</i>           | FBgn0261873 | FBtr0308217                                                                                                                                                             | 575   | 1260  | 9,51224E-94  | -1,13179 |
| <i>CG1115</i>        | FBgn0037299 | FBtr0305001                                                                                                                                                             | 146   | 320   | 2,17364E-24  | -1,13210 |
| <i>CG9821</i>        | FBgn0037636 | FBtr0081931                                                                                                                                                             | 11169 | 24493 | 0            | -1,13287 |
| <i>CG40351</i>       | FBgn0040022 | FBtr0113869,FBtr0113870,FBtr0113871,FBtr0302243,FBtr0302244,FBtr0302245,FBtr0302246,FBtr0302247,FBtr0302248                                                             | 2333  | 5119  | 0            | -1,13368 |
| <i>PRL-1</i>         | FBgn0024734 | FBtr0080857,FBtr0080856                                                                                                                                                 | 3641  | 8009  | 0            | -1,13729 |
| <i>Nipped-B</i>      | FBgn0026401 | FBtr0301454,FBtr0301455,FBtr0301456                                                                                                                                     | 528   | 1162  | 4,02952E-87  | -1,13800 |
| <i>mim</i>           | FBgn0053558 | FBtr0302579,FBtr0302034                                                                                                                                                 | 159   | 350   | 9,81333E-27  | -1,13833 |
| <i>CG11266</i>       | FBgn0031883 | FBtr0089638,FBtr0089639,FBtr0089640                                                                                                                                     | 391   | 861   | 8,46007E-65  | -1,13884 |
| <i>CG40191</i>       | FBgn0058191 | FBtr0113825,FBtr0113826                                                                                                                                                 | 113   | 249   | 2,42924E-19  | -1,13982 |
| <i>CG2698</i>        | FBgn0037536 | FBtr0308076                                                                                                                                                             | 176   | 388   | 9,93943E-30  | -1,14048 |
| <i>CG8949</i>        | FBgn0030812 | FBtr0304840                                                                                                                                                             | 1481  | 3271  | 4,99217E-245 | -1,14316 |
| <i>CG11266</i>       | FBgn0031883 | FBtr0089637,FBtr0089635,FBtr0089636                                                                                                                                     | 392   | 866   | 2,19011E-65  | -1,14351 |
| <i>Dyrk3</i>         | FBgn0027101 | FBtr0100404                                                                                                                                                             | 167   | 369   | 2,25841E-28  | -1,14377 |
| <i>Dyrk3</i>         | FBgn0027101 | FBtr0100405                                                                                                                                                             | 167   | 369   | 2,25841E-28  | -1,14377 |
| <i>fbf6</i>          | FBgn0033609 | FBtr0088179,FBtr0088180                                                                                                                                                 | 429   | 949   | 8,63769E-72  | -1,14543 |
| <i>fs(1)h</i>        | FBgn0004656 | FBtr0071118,FBtr0071120,FBtr0071121,FBtr0071122                                                                                                                         | 1051  | 2329  | 1,57576E-175 | -1,14795 |
| <i>CG15628</i>       | FBgn0031632 | FBtr0077384                                                                                                                                                             | 846   | 1877  | 7,06022E-142 | -1,14970 |
| <i>CG40191</i>       | FBgn0058191 | FBtr0113827                                                                                                                                                             | 114   | 253   | 9,37541E-20  | -1,15010 |
| <i>prominin-like</i> | FBgn0026189 | FBtr0073119,FBtr0073120                                                                                                                                                 | 965   | 2144  | 2,29549E-162 | -1,15170 |
| <i>sgg</i>           | FBgn0003371 | FBtr0111035,FBtr0070471,FBtr0070472,FBtr0070473,FBtr0070474,FBtr0070475,FBtr0070476,FBtr0070466,FBtr0070467,FBtr0070468,FBtr0070469,FBtr0070470,FBtr0301966,FBtr0302185 | 188   | 418   | 2,34799E-32  | -1,15277 |
| <i>mub</i>           | FBgn0262737 | FBtr0078468,FBtr0304981,FBtr0304982                                                                                                                                     | 2777  | 6185  | 0            | -1,15525 |
| <i>unk</i>           | FBgn0004395 | FBtr0084402                                                                                                                                                             | 1094  | 2439  | 1,56421E-185 | -1,15668 |
| <i>CG6700</i>        | FBgn0032305 | FBtr0080187                                                                                                                                                             | 1914  | 4276  | 0            | -1,15967 |
| <i>CG31360</i>       | FBgn0051360 | FBtr0083480                                                                                                                                                             | 258   | 577   | 1,09425E-44  | -1,16120 |
| <i>Cklibeta</i>      | FBgn0000259 | FBtr0073558                                                                                                                                                             | 2904  | 6510  | 0            | -1,16462 |
| <i>Lis-1</i>         | FBgn0015754 | FBtr0087236,FBtr0087238,FBtr0087239,FBtr0304747                                                                                                                         | 103   | 231   | 1,99239E-18  | -1,16525 |
| <i>mrj</i>           | FBgn0034091 | FBtr0087193,FBtr0087194,FBtr0087195,FBtr0087196,FBtr0113084,FBtr0306652,FBtr0306653                                                                                     | 626   | 1405  | 3,59501E-108 | -1,16634 |
| <i>Bsg</i>           | FBgn0261822 | FBtr0079570,FBtr0079568,FBtr0079569,FBtr0079573,FBtr0079567,FBtr0079571,FBtr0079572,FBtr0079566                                                                         | 1757  | 3947  | 3,01030E-303 | -1,16764 |
| <i>prominin-like</i> | FBgn0026189 | FBtr0073118,FBtr0306258                                                                                                                                                 | 1979  | 4461  | 0            | -1,17260 |
| <i>CG40178</i>       | FBgn0058178 | FBtr0113817,FBtr0113818                                                                                                                                                 | 373   | 841   | 1,42394E-65  | -1,17293 |
| <i>ens</i>           | FBgn0035500 | FBtr0073269,FBtr0073266,FBtr0073268,FBtr0073267,FBtr0073265                                                                                                             | 1535  | 3462  | 1,23333E-267 | -1,17337 |
| <i>snmRNA: 838</i>   | FBgn0065081 | FBtr0091797                                                                                                                                                             | 409   | 925   | 2,95653E-72  | -1,17735 |
| <i>ovo</i>           | FBgn0003028 | FBtr0070740,FBtr0070738,FBtr0070739,FBtr0100408                                                                                                                         | 1071  | 2425  | 1,30572E-188 | -1,17903 |
| <i>mp</i>            | FBgn0260660 | FBtr0301958                                                                                                                                                             | 262   | 594   | 6,42873E-47  | -1,18090 |
| <i>Parp</i>          | FBgn0010247 | FBtr0113885                                                                                                                                                             | 2081  | 4726  | 0            | -1,18334 |
| <i>alpha-Man-I</i>   | FBgn0259170 | FBtr0300512,FBtr0299632,FBtr0299633,FBtr0300513,FBtr0300514,FBtr0300515,FBtr0300516                                                                                     | 420   | 955   | 3,50134E-75  | -1,18511 |
| <i>CG7971</i>        | FBgn0035253 | FBtr0072806                                                                                                                                                             | 258   | 587   | 1,26070E-46  | -1,18599 |
| <i>Fbp2</i>          | FBgn0000640 | FBtr0079808                                                                                                                                                             | 1368  | 3125  | 3,71057E-246 | -1,19179 |
| <i>Dcp2</i>          | FBgn0036534 | FBtr0304975                                                                                                                                                             | 5414  | 12369 | 0            | -1,19196 |
| <i>CG40160</i>       | FBgn0058160 | FBtr0301802                                                                                                                                                             | 101   | 231   | 5,46026E-19  | -1,19354 |
| <i>ovo</i>           | FBgn0003028 | FBtr0301914                                                                                                                                                             | 1839  | 4223  | 0            | -1,19355 |

|                   |             |                                                                                                                                     |      |       |              |          |
|-------------------|-------------|-------------------------------------------------------------------------------------------------------------------------------------|------|-------|--------------|----------|
| <b>Pten</b>       | FBgn0026379 | FBtr0089900,FBtr0089901,FBtr0089904,FBtr0089905,FBtr0300562,FBtr0301521                                                             | 111  | 255   | 5,90781E-21  | -1,19994 |
| <b>Cklalpha</b>   | FBgn0015024 | FBtr0073681,FBtr0073682,FBtr0300380                                                                                                 | 4876 | 11209 | 0            | -1,20089 |
| <b>Atf6</b>       | FBgn0033010 | FBtr0086081                                                                                                                         | 1218 | 2808  | 3,49403E-224 | -1,20503 |
| <b>CR42723</b>    | FBgn0261640 | FBtr0303010                                                                                                                         | 229  | 528   | 9,01143E-43  | -1,20519 |
| <b>bun</b>        | FBgn0259176 | FBtr0299656                                                                                                                         | 428  | 987   | 2,51707E-79  | -1,20544 |
|                   |             | FBtr0303296                                                                                                                         | 3035 | 6999  | 0            | -1,20545 |
|                   |             | FBtr0301360,FBtr0301361                                                                                                             | 3035 | 6999  | 0            | -1,20545 |
| <b>rl</b>         | FBgn0003256 | FBtr0113699                                                                                                                         | 111  | 256   | 3,92375E-21  | -1,20558 |
| <b>hth</b>        | FBgn0001235 | FBtr0082256,FBtr0082254,FBtr0082255,FBtr0082253,FBtr0301345,FBtr0301956                                                             | 2368 | 5471  | 0            | -1,20814 |
| <b>eIF5</b>       | FBgn0030719 | FBtr0074147,FBtr0074146,FBtr0074144,FBtr0074148,FBtr0074145,FBtr0074150                                                             | 157  | 363   | 9,02092E-30  | -1,20921 |
| <b>Rbp2</b>       | FBgn0262734 | FBtr0074279,FBtr0074280                                                                                                             | 8054 | 18674 | 0            | -1,21325 |
| <b>CR42722</b>    | FBgn0261639 | FBtr0303009                                                                                                                         | 239  | 556   | 1,25553E-45  | -1,21807 |
| <b>vfl</b>        | FBgn0259789 | FBtr0307536                                                                                                                         | 917  | 2134  | 8,26687E-173 | -1,21857 |
| <b>Ank</b>        | FBgn0011747 | FBtr0089173                                                                                                                         | 131  | 305   | 2,05851E-25  | -1,21924 |
| <b>ci</b>         | FBgn0004859 | FBtr0089178                                                                                                                         | 725  | 1692  | 1,28452E-137 | -1,22268 |
| <b>Dyrk3</b>      | FBgn0027101 | FBtr0100402,FBtr0100403,FBtr0100404,FBtr0100405                                                                                     | 403  | 943   | 2,18515E-77  | -1,22648 |
| <b>syd</b>        | FBgn0024187 | FBtr0076769,FBtr0300412,FBtr0300413                                                                                                 | 134  | 314   | 2,37657E-26  | -1,22853 |
| <b>par-1</b>      | FBgn0260934 | FBtr0086452,FBtr0086459,FBtr0086453,FBtr0086454,FBtr0086455,FBtr0086457,FBtr0086458,FBtr0100390,FBtr0086460,FBtr0301505,FBtr0301506 | 1462 | 3426  | 1,06454E-279 | -1,22858 |
| <b>Adar</b>       | FBgn0026086 | FBtr0305499                                                                                                                         | 1148 | 2694  | 1,52968E-220 | -1,23063 |
| <b>CG17159</b>    | FBgn0039945 | FBtr0113717,FBtr0113721                                                                                                             | 702  | 1649  | 1,81151E-135 | -1,23205 |
| <b>sm</b>         | FBgn0003435 | FBtr0086492,FBtr0100232,FBtr0301609,FBtr0304654,FBtr0304655,FBtr0304656                                                             | 125  | 294   | 8,06989E-25  | -1,23389 |
| <b>CG7115</b>     | FBgn0027515 | FBtr0079523                                                                                                                         | 130  | 306   | 6,93494E-26  | -1,23502 |
| <b>Tsp39D</b>     | FBgn0032943 | FBtr0273404                                                                                                                         | 1442 | 3405  | 7,33644E-281 | -1,23958 |
| <b>Zyx</b>        | FBgn0011642 | FBtr0089210,FBtr0089211,FBtr0089212,FBtr0089213,FBtr0089214,FBtr0089215,FBtr0089216                                                 | 1261 | 2978  | 7,19690E-246 | -1,23978 |
| <b>gish</b>       | FBgn0250823 | FBtr0301304,FBtr0305071,FBtr0305072                                                                                                 | 1118 | 2644  | 7,94552E-219 | -1,24180 |
| <b>Asator</b>     | FBgn0039908 | FBtr0300342,FBtr0300344                                                                                                             | 385  | 912   | 3,84307E-76  | -1,24418 |
| <b>fwe</b>        | FBgn0261722 | FBtr0075543                                                                                                                         | 105  | 250   | 1,28715E-21  | -1,25154 |
| <b>sdt</b>        | FBgn0261873 | FBtr0089978,FBtr0100376,FBtr011034,FBtr0089975,FBtr0100375,FBtr0089974,FBtr0308218,FBtr0308219,FBtr0308220                          | 514  | 1224  | 1,36825E-102 | -1,25176 |
| <b>CG5065</b>     | FBgn0034145 | FBtr0087108,FBtr0302206                                                                                                             | 154  | 367   | 2,24687E-31  | -1,25285 |
| <b>PP2A-B'</b>    | FBgn0042693 | FBtr0290319                                                                                                                         | 321  | 765   | 1,95058E-64  | -1,25289 |
| <b>Nos</b>        | FBgn0011676 | FBtr0100484                                                                                                                         | 472  | 1126  | 9,60926E-95  | -1,25435 |
| <b>CG2233</b>     | FBgn0029990 | FBtr0071123                                                                                                                         | 472  | 1126  | 9,60926E-95  | -1,25435 |
| <b>ogre</b>       | FBgn0004646 | FBtr0071036                                                                                                                         | 1819 | 4345  | 0            | -1,25621 |
| <b>cals</b>       | FBgn0039928 | FBtr0089207                                                                                                                         | 129  | 310   | 6,39671E-27  | -1,26490 |
| <b>dally</b>      | FBgn0011577 | FBtr0305901                                                                                                                         | 2835 | 6822  | 0            | -1,26685 |
| <b>RecQ5</b>      | FBgn0027375 | FBtr0075714,FBtr0075715,FBtr0100362                                                                                                 | 278  | 669   | 2,80617E-57  | -1,26692 |
| <b>sky</b>        | FBgn0032901 | FBtr0081442,FBtr0081443,FBtr0081444,FBtr0081446,FBtr0081447,FBtr0081440,FBtr0081441,FBtr0301961                                     | 657  | 1586  | 3,66855E-135 | -1,27143 |
| <b>norpA</b>      | FBgn0262738 | FBtr0100670,FBtr0070651                                                                                                             | 895  | 2165  | 7,09472E-185 | -1,27441 |
| <b>Pdk1</b>       | FBgn0020386 | FBtr0072470,FBtr0072471,FBtr0072466,FBtr0072467                                                                                     | 863  | 2088  | 2,76865E-178 | -1,27469 |
| <b>CG32350</b>    | FBgn0052350 | FBtr0070046                                                                                                                         | 1234 | 2989  | 2,67323E-255 | -1,27632 |
| <b>myoglianin</b> | FBgn0026199 | FBtr0089092,FBtr0089093,FBtr0089094,FBtr0089095                                                                                     | 1046 | 2537  | 2,74952E-217 | -1,27824 |
| <b>TBPH</b>       | FBgn0025790 | FBtr0089624,FBtr0089626,FBtr0089627,FBtr0301643,FBtr0301644                                                                         | 146  | 356   | 2,16580E-31  | -1,28591 |
| <b>Mkk4</b>       | FBgn0024326 | FBtr0300443                                                                                                                         | 706  | 1722  | 7,66679E-149 | -1,28635 |
| <b>par-1</b>      | FBgn0260934 | FBtr0100391,FBtr0100392,FBtr0301504                                                                                                 | 601  | 1468  | 3,71299E-127 | -1,28842 |
| <b>rl</b>         | FBgn0003256 | FBtr0113700                                                                                                                         | 97   | 237   | 2,94223E-21  | -1,28883 |
| <b>CdGAPr</b>     | FBgn0032821 | FBtr0300966                                                                                                                         | 221  | 540   | 2,40085E-47  | -1,28891 |
| <b>unk</b>        | FBgn0004395 | FBtr0305573                                                                                                                         | 1206 | 2953  | 7,19489E-256 | -1,29195 |
| <b>RpL38</b>      | FBgn0040007 | FBtr0111120                                                                                                                         | 9077 | 22236 | 0            | -1,29261 |
| <b>Dyrk3</b>      | FBgn0027101 | FBtr0100402,FBtr0100406                                                                                                             | 173  | 424   | 1,83968E-37  | -1,29329 |
| <b>CR41604</b>    | FBgn0085814 | FBtr0114270                                                                                                                         | 408  | 1000  | 2,58936E-87  | -1,29336 |
| <b>CdGAPr</b>     | FBgn0032821 | FBtr0300967                                                                                                                         | 220  | 540   | 1,81284E-47  | -1,29546 |
| <b>bow1</b>       | FBgn0004893 | FBtr0077490,FBtr0077491,FBtr0077492,FBtr0307026,FBtr0307027,FBtr0307028,FBtr0307029                                                 | 483  | 1186  | 1,16326E-103 | -1,29601 |
| <b>heph</b>       | FBgn0011224 | FBtr0085885                                                                                                                         | 124  | 305   | 2,52222E-27  | -1,29847 |
| <b>CG42724</b>    | FBgn0261641 | FBtr0303012,FBtr0303018                                                                                                             | 119  | 294   | 1,90589E-26  | -1,30485 |
| <b>CG42724</b>    | FBgn0261641 | FBtr0303013,FBtr0303016                                                                                                             | 119  | 294   | 1,90589E-26  | -1,30485 |
| <b>CG17528</b>    | FBgn0261387 | FBtr0111276,FBtr0111275,FBtr0111277                                                                                                 | 197  | 487   | 2,37831E-43  | -1,30573 |
| <b>Mkk4</b>       | FBgn0024326 | FBtr0081892                                                                                                                         | 735  | 1820  | 2,55020E-160 | -1,30812 |
| <b>gro</b>        | FBgn0001139 | FBtr0305047                                                                                                                         | 1834 | 4562  | 0            | -1,31467 |
| <b>CG4502</b>     | FBgn0031896 | FBtr0079417                                                                                                                         | 327  | 816   | 4,82499E-73  | -1,31928 |
| <b>pncr013:4</b>  | FBgn0262731 | FBtr0091952                                                                                                                         | 409  | 1021  | 3,70007E-91  | -1,31981 |
| <b>CG4502</b>     | FBgn0031896 | FBtr0079416                                                                                                                         | 324  | 809   | 1,79217E-72  | -1,32015 |
| <b>stai</b>       | FBgn0051641 | FBtr0304908                                                                                                                         | 2607 | 6517  | 0            | -1,32182 |
| <b>CR41604</b>    | FBgn0085814 | FBtr0114271,FBtr0114272                                                                                                             | 412  | 1034  | 4,75262E-93  | -1,32752 |
| <b>CR41604</b>    | FBgn0085814 | FBtr0114269                                                                                                                         | 411  | 1032  | 8,44174E-93  | -1,32823 |
| <b>stai</b>       | FBgn0051641 | FBtr0079196,FBtr0079197,FBtr0079198                                                                                                 | 2583 | 6490  | 0            | -1,32917 |
| <b>Hrb98DE</b>    | FBgn0001215 | FBtr0085300,FBtr0085303                                                                                                             | 83   | 209   | 2,07856E-19  | -1,33232 |
| <b>Mhcl</b>       | FBgn0026059 | FBtr0083231                                                                                                                         | 158  | 399   | 1,10417E-36  | -1,33646 |
| <b>plexA</b>      | FBgn0025741 | FBtr0089224,FBtr0100296                                                                                                             | 106  | 268   | 7,41937E-25  | -1,33817 |
| <b>Marf</b>       | FBgn0029870 | FBtr0070908,FBtr0070910                                                                                                             | 104  | 264   | 1,00277E-24  | -1,34395 |
| <b>clumsky</b>    | FBgn0026255 | FBtr0081476,FBtr0110895                                                                                                             | 137  | 349   | 1,62519E-32  | -1,34905 |
| <b>zip</b>        | FBgn0005634 | FBtr0072399,FBtr0100466,FBtr0100467,FBtr0302572,FBtr0302573,FBtr0302574,FBtr0302575,FBtr0306576                                     | 1064 | 2712  | 1,38663E-247 | -1,34986 |
| <b>mp</b>         | FBgn0260660 | FBtr0308095                                                                                                                         | 104  | 266   | 4,11726E-25  | -1,35484 |
| <b>CG41454</b>    | FBgn0084017 | FBtr0111173                                                                                                                         | 78   | 200   | 4,13435E-19  | -1,35845 |
| <b>CrebA</b>      | FBgn0004396 | FBtr0075557                                                                                                                         | 631  | 1618  | 5,28727E-149 | -1,35850 |
| <b>myoglianin</b> | FBgn0026199 | FBtr0089094                                                                                                                         | 294  | 755   | 5,04510E-70  | -1,36066 |
| <b>Hr46</b>       | FBgn0000448 | FBtr0306346                                                                                                                         | 358  | 922   | 1,09639E-85  | -1,36481 |
| <b>Atf6</b>       | FBgn0033010 | FBtr0086079,FBtr0086080                                                                                                             | 805  | 2078  | 8,45723E-193 | -1,36813 |
| <b>Dh44-R2</b>    | FBgn0033744 | FBtr0113075                                                                                                                         | 143  | 370   | 5,37724E-35  | -1,37151 |
| <b>CG12054</b>    | FBgn0039831 | FBtr0305118                                                                                                                         | 1490 | 3863  | 0            | -1,37441 |
| <b>CG11727</b>    | FBgn0262740 | FBtr0073547                                                                                                                         | 733  | 1902  | 8,34279E-178 | -1,37563 |
| <b>CR41597</b>    | FBgn0085810 | FBtr0114264                                                                                                                         | 198  | 514   | 1,42652E-48  | -1,37627 |
| <b>CG81116</b>    | FBgn0037614 | FBtr0300543                                                                                                                         | 133  | 348   | 1,96894E-33  | -1,38766 |

|                  |             |                                                                                                                         |       |       |              |          |
|------------------|-------------|-------------------------------------------------------------------------------------------------------------------------|-------|-------|--------------|----------|
| <b>hth</b>       | FBgn0001235 | FBTr0100454                                                                                                             | 3987  | 10441 | 0            | -1,38888 |
| <b>pho</b>       | FBgn0002521 | FBTr0089204,FBTr0089205                                                                                                 | 1568  | 4113  | 0            | -1,39127 |
| <b>PMCA</b>      | FBgn0259214 | FBTr0304046,FBTr0304047,FBTr0304048,FBTr0304049,FBTr0300554,FBTr0300555,FBTr0300556,FBTr0300557                         | 287   | 753   | 9,53534E-72  | -1,39160 |
| <b>vn</b>        | FBgn0003984 | FBTr0077082                                                                                                             | 276   | 725   | 3,85431E-69  | -1,39331 |
| <b>CaMKI</b>     | FBgn0016126 | FBTr0089065                                                                                                             | 476   | 1255  | 9,72904E-120 | -1,39865 |
| <b>CG11266</b>   | FBgn0031883 | FBTr0089638,FBTr0089639,FBTr0089635                                                                                     | 195   | 517   | 3,75925E-50  | -1,40669 |
| <b>Ptp10D</b>    | FBgn0004370 | FBTr0073524,FBTr0273235                                                                                                 | 718   | 1904  | 1,31837E-182 | -1,40698 |
| <b>mRpS5</b>     | FBgn0044510 | FBTr011147,FBTr011146                                                                                                   | 420   | 1117  | 7,13268E-108 | -1,41117 |
| <b>H</b>         | FBgn0001169 | FBTr0083915,FBTr0083916                                                                                                 | 217   | 580   | 1,01908E-56  | -1,41836 |
| <b>Nhe3</b>      | FBgn0028703 | FBTr0273247,FBTr0273248,FBTr0273250                                                                                     | 162   | 433   | 1,48752E-42  | -1,41837 |
| <b>UbcD2</b>     | FBgn0015320 | FBTr0080115,FBTr0080116                                                                                                 | 709   | 1897  | 7,24710E-184 | -1,41986 |
| <b>CG11266</b>   | FBgn0031883 | FBTr0089637                                                                                                             | 195   | 522   | 3,88705E-51  | -1,42058 |
| <b>CG30343</b>   | FBgn0050343 | FBTr0088594                                                                                                             | 290   | 778   | 4,86016E-76  | -1,42372 |
| <b>Adar</b>      | FBgn0026086 | FBTr0070299,FBTr0070300,FBTr0100557,FBTr0307895,FBTr0305498                                                             | 151   | 411   | 3,84228E-41  | -1,44459 |
| <b>pUf68</b>     | FBgn0028577 | FBTr0072708,FBTr0072710,FBTr0300418                                                                                     | 95    | 260   | 1,49000E-26  | -1,45251 |
| <b>bw</b>        | FBgn0000241 | FBTr0072117                                                                                                             | 126   | 345   | 5,22632E-35  | -1,45317 |
| <b>A2bp1</b>     | FBgn0052062 | FBTr0305093,FBTr0305096                                                                                                 | 1273  | 3499  | 0            | -1,45871 |
| <b>CG32709</b>   | FBgn0052709 | FBTr0305288                                                                                                             | 68    | 187   | 1,71352E-19  | -1,45943 |
| <b>Cam</b>       | FBgn0000253 | FBTr0088001,FBTr0088002                                                                                                 | 8477  | 23442 | 0            | -1,46747 |
| <b>sky</b>       | FBgn0032901 | FBTr0081445                                                                                                             | 276   | 764   | 1,75575E-77  | -1,46890 |
| <b>crq</b>       | FBgn0015924 | FBTr0078087                                                                                                             | 603   | 1670  | 1,00872E-168 | -1,46962 |
| <b>Galpha49B</b> | FBgn0004435 | FBTr0087829,FBTr0087830                                                                                                 | 334   | 930   | 8,17659E-95  | -1,47738 |
| <b>CG41520</b>   | FBgn0087011 | FBTr0114111,FBTr0114112,FBTr0302581,FBTr0302582                                                                         | 140   | 390   | 3,62801E-40  | -1,47805 |
| <b>tal-1A</b>    | FBgn0259730 | FBTr0299997                                                                                                             | 364   | 1015  | 1,24397E-103 | -1,47947 |
| <b>tal-2A</b>    | FBgn0259731 | FBTr0299998                                                                                                             | 364   | 1015  | 1,24397E-103 | -1,47947 |
| <b>tal-3A</b>    | FBgn0259732 | FBTr0299999                                                                                                             | 364   | 1015  | 1,24397E-103 | -1,47947 |
| <b>tal-AA</b>    | FBgn0259733 | FBTr0299996                                                                                                             | 364   | 1015  | 1,24397E-103 | -1,47947 |
| <b>CadN</b>      | FBgn0015609 | FBTr0081016,FBTr0081015,FBTr0100313,FBTr0100315                                                                         | 152   | 424   | 8,51733E-44  | -1,47999 |
| <b>CG32856</b>   | FBgn0052856 | FBTr0083239,FBTr0302551                                                                                                 | 86    | 240   | 4,48799E-25  | -1,48063 |
| <b>pho</b>       | FBgn0002521 | FBTr0089204                                                                                                             | 121   | 338   | 3,94237E-35  | -1,48202 |
| <b>Cklalpha</b>  | FBgn0015024 | FBTr0073680                                                                                                             | 5117  | 14301 | 0            | -1,48275 |
| <b>elF-4B</b>    | FBgn0020660 | FBTr0113680                                                                                                             | 78    | 218   | 7,65373E-23  | -1,48278 |
| <b>AP-1gamma</b> | FBgn0030089 | FBTr0071295,FBTr0071297,FBTr0071298,FBTr0112965                                                                         | 84    | 235   | 1,47814E-24  | -1,48420 |
| <b>heph</b>      | FBgn0011224 | FBTr0300268,FBTr0300269                                                                                                 | 173   | 484   | 5,90781E-50  | -1,48424 |
| <b>pncr013:4</b> | FBgn0262731 | FBTr0303019,FBTr0303020,FBTr0303021                                                                                     | 168   | 471   | 1,11139E-48  | -1,48727 |
| <b>Df31</b>      | FBgn0022893 | FBTr0085919,FBTr0085920                                                                                                 | 29123 | 81808 | 0            | -1,49008 |
| <b>Df31</b>      | FBgn0022893 | FBTr0100293                                                                                                             | 29264 | 82324 | 0            | -1,49219 |
| <b>CG11727</b>   | FBgn0262740 | FBTr0300733                                                                                                             | 554   | 1561  | 9,18083E-161 | -1,49451 |
| <b>how</b>       | FBgn0017397 | FBTr0084177                                                                                                             | 1467  | 4160  | 0            | -1,50371 |
| <b>CaMKI</b>     | FBgn0016126 | FBTr0089066                                                                                                             | 67    | 190   | 1,87120E-20  | -1,50377 |
| <b>Zyx</b>       | FBgn0011642 | FBTr0089210,FBTr0089213                                                                                                 | 160   | 457   | 2,71772E-48  | -1,51412 |
| <b>qkr58E-3</b>  | FBgn0022984 | FBTr0290254                                                                                                             | 859   | 2461  | 6,85726E-258 | -1,51851 |
| <b>Dyrk3</b>     | FBgn0027101 | FBTr0100406                                                                                                             | 461   | 1324  | 1,91524E-139 | -1,52206 |
| <b>Akap200</b>   | FBgn0027932 | FBTr0079665                                                                                                             | 112   | 324   | 6,47659E-35  | -1,53250 |
| <b>how</b>       | FBgn0017397 | FBTr0301401                                                                                                             | 1394  | 4049  | 0            | -1,53834 |
| <b>Mitf</b>      | FBgn0263112 | FBTr0307326,FBTr0307327,FBTr0307329,FBTr0307330                                                                         | 172   | 501   | 5,31867E-54  | -1,54240 |
| <b>Ptp10D</b>    | FBgn0004370 | FBTr0073525,FBTr0073522                                                                                                 | 323   | 942   | 4,79061E-101 | -1,54419 |
| <b>gus</b>       | FBgn0026238 | FBTr0089755,FBTr0089752,FBTr0089754,FBTr0089757,FBTr0089753,FBTr0089756                                                 | 457   | 1339  | 4,93461E-144 | -1,55089 |
| <b>lin19</b>     | FBgn0015509 | FBTr0088846                                                                                                             | 108   | 317   | 9,87245E-35  | -1,55345 |
| <b>slow</b>      | FBgn0035539 | FBTr0073291                                                                                                             | 84    | 247   | 3,17946E-27  | -1,55605 |
| <b>Zyx</b>       | FBgn0011642 | FBTr0089211,FBTr0089216                                                                                                 | 161   | 474   | 1,25213E-51  | -1,55783 |
| <b>gish</b>      | FBgn0250823 | FBTr0083262,FBTr0083261,FBTr0083265,FBTr0083264,FBTr0100332,FBTr0100333                                                 | 783   | 2311  | 4,43206E-250 | -1,56143 |
| <b>Zyx</b>       | FBgn0011642 | FBTr0089212,FBTr0089215                                                                                                 | 161   | 476   | 3,08894E-52  | -1,56390 |
| <b>Mbs</b>       | FBgn0005536 | FBTr0112850,FBTr0112851,FBTr0112852,FBTr0301472,FBTr0301473,FBTr0301575,FBTr0308213,FBTr0308214,FBTr0308215,FBTr0308216 | 453   | 1340  | 1,62726E-145 | -1,56465 |
| <b>Antp</b>      | FBgn0260642 | FBTr0081654,FBTr0081655                                                                                                 | 340   | 1009  | 4,03823E-110 | -1,56932 |
| <b>linx2</b>     | FBgn0027108 | FBTr0071005,FBTr0071006                                                                                                 | 13280 | 39521 | 0            | -1,57336 |
| <b>qkr58E-3</b>  | FBgn0022984 | FBTr0307214                                                                                                             | 909   | 2715  | 2,23244E-297 | -1,57860 |
| <b>zip</b>       | FBgn0005634 | FBTr0072398                                                                                                             | 1395  | 4169  | 0            | -1,57944 |
| <b>Cam</b>       | FBgn0000253 | FBTr0304963,FBTr0304964                                                                                                 | 8960  | 26840 | 0            | -1,58281 |
| <b>Hr46</b>      | FBgn0000448 | FBTr0306345                                                                                                             | 706   | 2122  | 4,88718E-234 | -1,58768 |
| <b>shi</b>       | FBgn0003392 | FBTr0111036,FBTr0111037,FBTr0074118,FBTr0074119,FBTr0074121,FBTr0074122,FBTr0301597                                     | 432   | 1300  | 8,43643E-144 | -1,58941 |
| <b>CR43241</b>   | FBgn0262886 | FBTr0306297                                                                                                             | 91    | 274   | 7,23096E-31  | -1,59024 |
| <b>CG40228</b>   | FBgn0063670 | FBTr0113841                                                                                                             | 600   | 1813  | 3,02493E-201 | -1,59534 |
| <b>CG8500</b>    | FBgn0037754 | FBTr0082139                                                                                                             | 143   | 433   | 9,14005E-49  | -1,59835 |
| <b>Akap200</b>   | FBgn0027932 | FBTr0079665,FBTr0079667                                                                                                 | 5576  | 16929 | 0            | -1,60219 |
| <b>Akap200</b>   | FBgn0027932 | FBTr0079664,FBTr0079666                                                                                                 | 5576  | 16932 | 0            | -1,60245 |
| <b>Zyx</b>       | FBgn0011642 | FBTr0089210,FBTr0089213,FBTr0089215                                                                                     | 199   | 605   | 4,20877E-68  | -1,60417 |
| <b>Dyb</b>       | FBgn0033739 | FBTr0087930,FBTr0087929,FBTr0100298,FBTr0305077                                                                         | 199   | 608   | 9,41844E-69  | -1,61130 |
| <b>CG40196</b>   | FBgn0058196 | FBTr0113831                                                                                                             | 176   | 538   | 7,09221E-61  | -1,61203 |
| <b>unc-13</b>    | FBgn0025726 | FBTr0089245                                                                                                             | 210   | 644   | 5,21925E-73  | -1,61667 |
| <b>lin19</b>     | FBgn0015509 | FBTr0088845                                                                                                             | 99    | 304   | 5,74404E-35  | -1,61857 |
| <b>CG42258</b>   | FBgn0259143 | FBTr0299558,FBTr0299559                                                                                                 | 372   | 1149  | 1,20800E-130 | -1,62700 |
| <b>CG15923</b>   | FBgn0038814 | FBTr0113254                                                                                                             | 676   | 2089  | 4,11093E-207 | -1,62772 |
| <b>pAbp</b>      | FBgn0261619 | FBTr0086740                                                                                                             | 525   | 1627  | 2,16402E-185 | -1,63182 |
| <b>Zyx</b>       | FBgn0011642 | FBTr0089211,FBTr0089212,FBTr0089214,FBTr0089216                                                                         | 225   | 702   | 8,38688E-81  | -1,64155 |
| <b>unc-13</b>    | FBgn0025726 | FBTr0089246,FBTr0089247                                                                                                 | 210   | 658   | 3,30170E-76  | -1,64770 |
| <b>CG17528</b>   | FBgn0261387 | FBTr0111274                                                                                                             | 72    | 227   | 5,86429E-27  | -1,65662 |
| <b>CG17698</b>   | FBgn0040056 | FBTr0111168,FBTr0111167                                                                                                 | 298   | 941   | 1,49195E-109 | -1,65888 |
| <b>mt-Cyt-b</b>  | FBgn0013678 | FBTr0100884                                                                                                             | 10582 | 33560 | 0            | -1,66513 |
| <b>CG11266</b>   | FBgn0031883 | FBTr0089639,FBTr0089635                                                                                                 | 62    | 197   | 1,30601E-23  | -1,66786 |
| <b>spz4</b>      | FBgn0032362 | FBTr0305261                                                                                                             | 55    | 175   | 3,34641E-21  | -1,66985 |
| <b>Cklbeta</b>   | FBgn0000259 | FBTr0073562                                                                                                             | 58    | 185   | 2,16939E-22  | -1,67340 |
| <b>CG17715</b>   | FBgn0041004 | FBTr0111247                                                                                                             | 465   | 1491  | 1,33298E-175 | -1,68098 |
| <b>CG17683</b>   | FBgn0262115 | FBTr0111301                                                                                                             | 116   | 374   | 8,00901E-45  | -1,68891 |
| <b>CrebA</b>     | FBgn0004396 | FBTr0075558                                                                                                             | 1076  | 3520  | 0            | -1,70990 |
| <b>qkr54B</b>    | FBgn0022987 | FBTr0306248                                                                                                             | 550   | 1804  | 3,30019E-217 | -1,71370 |

|                                      |             |                                                                                                                         |       |        |              |          |
|--------------------------------------|-------------|-------------------------------------------------------------------------------------------------------------------------|-------|--------|--------------|----------|
| <b>Hr46</b>                          | FBgn0000448 | FBtr0088366,FBtr0088368,FBtr0112799,FBtr0302438                                                                         | 563   | 1848   | 1,26810E-222 | -1,71476 |
| <b>pncr013:4</b>                     | FBgn0262731 | FBtr0303020                                                                                                             | 52    | 171    | 2,41338E-21  | -1,71741 |
| <b>CG17715</b>                       | FBgn0041004 | FBtr0111249                                                                                                             | 640   | 2109   | 7,61203E-255 | -1,72042 |
| <b>clumsy</b>                        | FBgn0026255 | FBtr0081476                                                                                                             | 44    | 145    | 2,87485E-18  | -1,72048 |
| <b>sgg</b>                           | FBgn0003371 | FBtr0070475,FBtr0070476,FBtr0301966                                                                                     | 1077  | 3564   | 0            | -1,72648 |
|                                      |             | FBtr0082858                                                                                                             | 11411 | 37797  | 0            | -1,72785 |
| <b>sgg</b>                           | FBgn0003371 | FBtr0070471,FBtr0070472,FBtr0070473,FBtr0070466,FBtr0070468,FBtr0070469,FBtr0070470                                     | 1085  | 3607   | 0            | -1,73310 |
| <b>mt:Coll</b>                       | FBgn0013676 | FBtr0100868                                                                                                             | 24108 | 80212  | 0            | -1,73431 |
| <b>Pabp2</b>                         | FBgn0005648 | FBtr0088786                                                                                                             | 136   | 462    | 6,85597E-58  | -1,76429 |
| <b>CG12567</b>                       | FBgn0039958 | FBtr0113704,FBtr0113705,FBtr0300702,FBtr0300703,FBtr0300704                                                             | 386   | 1316   | 2,79252E-164 | -1,76949 |
| <b>CG9894</b>                        | FBgn0031453 | FBtr0077713,FBtr0077714,FBtr0307080                                                                                     | 1577  | 5391   | 0            | -1,77337 |
| <b>myoglianin</b>                    | FBgn0026199 | FBtr0089095                                                                                                             | 77    | 267    | 2,47473E-34  | -1,79391 |
| <b>Pdp1</b>                          | FBgn0016694 | FBtr0076776,FBtr0076777,FBtr0300499,FBtr0306535                                                                         | 76    | 265    | 2,51395E-34  | -1,80192 |
| <b>Pur-alpha</b>                     | FBgn0022361 | FBtr0089996,FBtr0089995,FBtr0089994,FBtr0089993                                                                         | 389   | 1363   | 1,89792E-174 | -1,80894 |
| <b>Cyp6g1</b>                        | FBgn0025454 | FBtr0087992                                                                                                             | 69    | 243    | 1,02594E-31  | -1,81629 |
| <b>pallidin</b>                      | FBgn0036192 | FBtr0300097,FBtr0300725,FBtr0300726                                                                                     | 80    | 282    | 7,27341E-37  | -1,81762 |
| <b>CaMKII</b>                        | FBgn0004624 | FBtr0089218,FBtr0089219,FBtr0089217                                                                                     | 438   | 1545   | 9,24175E-199 | -1,81860 |
| <b>CaMKII</b>                        | FBgn0004624 | FBtr0100146,FBtr0100147,FBtr0100148,FBtr0300378                                                                         | 438   | 1546   | 5,50608E-199 | -1,81954 |
| <b>CG17683</b>                       | FBgn0262115 | FBtr0111298,FBtr0111299                                                                                                 | 68    | 244    | 2,17454E-32  | -1,84327 |
| <b>Mnt</b>                           | FBgn0023215 | FBtr0307278,FBtr0301823                                                                                                 | 588   | 2113   | 4,46420E-276 | -1,84540 |
| <b>Nrg</b>                           | FBgn0002968 | FBtr0071207,FBtr0071209,FBtr0301762,FBtr0301764,FBtr0305914                                                             | 955   | 3445   | 0            | -1,85093 |
| <b>elF4G</b>                         | FBgn0023213 | FBtr0089243,FBtr0112904                                                                                                 | 120   | 435    | 7,55305E-58  | -1,85798 |
| <b>gish</b>                          | FBgn0250823 | FBtr0083263                                                                                                             | 845   | 3086   | 0            | -1,86871 |
| <b>elF4G</b>                         | FBgn0023213 | FBtr0289951                                                                                                             | 120   | 439    | 8,85716E-59  | -1,87119 |
| <b>CaMKI</b>                         | FBgn0016126 | FBtr0089067                                                                                                             | 131   | 484    | 2,69554E-65  | -1,88544 |
| <b>CaMKI</b>                         | FBgn0016126 | FBtr0089069                                                                                                             | 53    | 198    | 1,99656E-27  | -1,90144 |
| <b>tlk</b>                           | FBgn0086899 | FBtr0299580,FBtr0299582,FBtr0301659                                                                                     | 44    | 165    | 5,18156E-23  | -1,90689 |
| <b>piwi</b>                          | FBgn0004872 | FBtr0080166                                                                                                             | 38    | 143    | 5,90831E-20  | -1,91194 |
| <b>UBL3</b>                          | FBgn0026076 | FBtr0074175                                                                                                             | 54    | 204    | 2,24984E-28  | -1,91754 |
| <b>elF-4B</b>                        | FBgn0020660 | FBtr0113679                                                                                                             | 123   | 469    | 8,35145E-65  | -1,93093 |
| <b>mt:Col</b>                        | FBgn0013674 | FBtr0100861                                                                                                             | 38379 | 146749 | 0            | -1,93496 |
| <b>Antp</b>                          | FBgn0260642 | FBtr0081647,FBtr0081648,FBtr0081649,FBtr0081650,FBtr0081651,FBtr0081652,FBtr0081653,FBtr0081656                         | 485   | 1855   | 2,26490E-255 | -1,93536 |
|                                      |             | FBtr0076660                                                                                                             | 582   | 2241   | 4,0709E-310  | -1,94505 |
| <b>Fas3</b>                          | FBgn0000636 | FBtr0081051,FBtr0081052                                                                                                 | 1972  | 7762   | 0            | -1,97677 |
| <b>kn</b>                            | FBgn0001319 | FBtr0087465,FBtr0112810,FBtr0301400                                                                                     | 146   | 575    | 2,00160E-81  | -1,97759 |
| <b>Eph</b>                           | FBgn0025936 | FBtr0089082,FBtr0089083,FBtr0089084                                                                                     | 310   | 1229   | 2,62596E-174 | -1,98714 |
| <b>Ank</b>                           | FBgn0011747 | FBtr0089174                                                                                                             | 117   | 465    | 1,75090E-66  | -1,99072 |
| <b>grk</b>                           | FBgn0001137 | FBtr0079708                                                                                                             | 85    | 338    | 1,74675E-48  | -1,99149 |
| <b>plexA</b>                         | FBgn0025741 | FBtr0089225,FBtr0089226,FBtr0089223                                                                                     | 144   | 573    | 6,82466E-82  | -1,99247 |
| <b>CG2316</b>                        | FBgn0039890 | FBtr0089148                                                                                                             | 33    | 132    | 1,62356E-19  | -2       |
| <b>CG32016</b>                       | FBgn0052016 | FBtr0089229                                                                                                             | 80    | 321    | 2,16540E-46  | -2,00450 |
| <b>CG8419</b>                        | FBgn0031999 | FBtr0079589                                                                                                             | 100   | 404    | 1,44467E-58  | -2,01436 |
| <b>lola</b>                          | FBgn0005630 | FBtr0089365,FBtr0089347,FBtr0089361,FBtr0089360,FBtr0089366,FBtr0089355,FBtr0089354,FBtr0089346,FBtr0089345,FBtr0089364 | 128   | 518    | 6,20061E-75  | -2,01681 |
| <b>Galpha49B</b>                     | FBgn0004435 | FBtr0304955                                                                                                             | 828   | 3452   | 0            | -2,05973 |
| <b>CG17715</b>                       | FBgn0041004 | FBtr0111244,FBtr0111246,FBtr0111245,FBtr0111248,FBtr0306550,FBtr0306551                                                 | 142   | 593    | 1,14625E-87  | -2,06214 |
| <b>Eph</b>                           | FBgn0025936 | FBtr0089086                                                                                                             | 257   | 1076   | 6,00570E-159 | -2,06584 |
| <b>Ank</b>                           | FBgn0011747 | FBtr0089172                                                                                                             | 29    | 122    | 8,17736E-19  | -2,07276 |
| <b>Mnt</b>                           | FBgn0023215 | FBtr0307277,FBtr0301822                                                                                                 | 646   | 2748   | 0            | -2,08878 |
| <b>Rbp1-like</b>                     | FBgn0030479 | FBtr0073790                                                                                                             | 233   | 997    | 8,48509E-150 | -2,09726 |
| <b>CG9894</b>                        | FBgn0031453 | FBtr0307080                                                                                                             | 3611  | 15511  | 0            | -2,10282 |
| <b>swi2</b>                          | FBgn0034262 | FBtr0086889                                                                                                             | 66    | 284    | 3,01724E-43  | -2,10535 |
| <b>Ank</b>                           | FBgn0011747 | FBtr0089173,FBtr0089171,FBtr0089172,FBtr0300497,FBtr0300498                                                             | 99    | 429    | 2,47363E-65  | -2,11548 |
| <b>CG9894</b>                        | FBgn0031453 | FBtr0077713,FBtr0077714                                                                                                 | 2522  | 11197  | 0            | -2,15047 |
| <b>H</b>                             | FBgn0001169 | FBtr0083914,FBtr0083917                                                                                                 | 426   | 1911   | 1,96911E-296 | -2,16540 |
| <b>CG17471</b>                       | FBgn0039924 | FBtr0100543                                                                                                             | 53    | 241    | 3,07592E-38  | -2,18497 |
| <b>CG17471</b>                       | FBgn0039924 | FBtr0100544                                                                                                             | 52    | 238    | 5,01616E-38  | -2,19438 |
| <b>Hr39</b>                          | FBgn0261239 | FBtr0081480                                                                                                             | 209   | 966    | 2,89772E-153 | -2,20852 |
| <b>pncr013:4</b>                     | FBgn0262731 | FBtr0303019                                                                                                             | 75    | 351    | 1,52964E-56  | -2,22651 |
| <b>CG32016</b>                       | FBgn0052016 | FBtr0089233                                                                                                             | 90    | 424    | 2,16374E-68  | -2,23607 |
| <b>mt:Coll</b>                       | FBgn0013675 | FBtr0100863                                                                                                             | 6779  | 32317  | 0            | -2,25315 |
| <b>CG10006</b>                       | FBgn0036461 | FBtr0113171                                                                                                             | 26    | 124    | 1,12738E-20  | -2,25376 |
| <b>CG10417</b>                       | FBgn0033021 | FBtr0086092                                                                                                             | 71    | 341    | 6,05536E-56  | -2,26388 |
| <b>pncr013:4</b>                     | FBgn0262731 | FBtr0091952,FBtr0303019,FBtr0303020,FBtr0303021                                                                         | 39    | 190    | 1,40467E-31  | -2,28445 |
| <b>CG32016</b>                       | FBgn0052016 | FBtr0089232                                                                                                             | 63    | 307    | 7,74506E-51  | -2,28481 |
| <b>CR43241</b>                       | FBgn0262886 | FBtr0306296                                                                                                             | 30    | 149    | 2,98909E-25  | -2,31228 |
| <b>Pdp1</b>                          | FBgn0016694 | FBtr0076775,FBtr0076776,FBtr0076777,FBtr0076780,FBtr0076782,FBtr0300499,FBtr0300500                                     | 120   | 608    | 1,55930E-102 | -2,34104 |
| <b>Galpha49B</b>                     | FBgn0004435 | FBtr0087829,FBtr0087830,FBtr0087831,FBtr0087833,FBtr0087834,FBtr0304954                                                 | 481   | 2445   | 0            | -2,34573 |
| <b>Pdp1</b>                          | FBgn0016694 | FBtr0306535                                                                                                             | 122   | 623    | 1,68750E-105 | -2,35235 |
| <b>myoglianin</b>                    | FBgn0026199 | FBtr0089092,FBtr0089093                                                                                                 | 70    | 373    | 5,15266E-65  | -2,41375 |
| <b>Hr39</b>                          | FBgn0261239 | FBtr0081479,FBtr0081481                                                                                                 | 593   | 3193   | 0            | -2,42881 |
| <b>CG2225</b>                        | FBgn0032957 | FBtr0304885                                                                                                             | 87    | 476    | 5,94596E-84  | -2,45187 |
| <b>CG2316</b>                        | FBgn0039890 | FBtr0089147                                                                                                             | 25    | 140    | 1,36617E-25  | -2,48543 |
| <b>Pabp2</b>                         | FBgn0005648 | FBtr0088785                                                                                                             | 918   | 5443   | 0            | -2,56784 |
| <b>how</b>                           | FBgn0017397 | FBtr0100514                                                                                                             | 21    | 128    | 1,99577E-24  | -2,60768 |
| <b>pAbp</b>                          | FBgn0261619 | FBtr0086743,FBtr0086739                                                                                                 | 201   | 1240   | 5,79967E-233 | -2,62507 |
| <b>pAbp</b>                          | FBgn0261619 | FBtr0086738                                                                                                             | 201   | 1240   | 5,79967E-233 | -2,62507 |
| <b>ventrally-expressed-protein-D</b> | FBgn0053200 | FBtr0307213                                                                                                             | 27    | 167    | 5,16887E-32  | -2,62882 |
| <b>CG2316</b>                        | FBgn0039890 | FBtr0089146                                                                                                             | 17    | 108    | 3,98726E-21  | -2,66742 |
| <b>CG40196</b>                       | FBgn0058196 | FBtr0113829,FBtr0113830,FBtr0301121                                                                                     | 40    | 258    | 6,03165E-50  | -2,68930 |
| <b>UBL3</b>                          | FBgn0026076 | FBtr0074174,FBtr0300787                                                                                                 | 82    | 533    | 5,23642E-103 | -2,70044 |
| <b>CG10417</b>                       | FBgn0033021 | FBtr0086091                                                                                                             | 74    | 485    | 2,98528E-94  | -2,71239 |
| <b>CG7367</b>                        | FBgn0031976 | FBtr0306002                                                                                                             | 49    | 323    | 3,43181E-63  | -2,72068 |
| <b>CG7367</b>                        | FBgn0031976 | FBtr0301128                                                                                                             | 69    | 460    | 5,56643E-90  | -2,73697 |
| <b>CG3999</b>                        | FBgn0037801 | FBtr0082225                                                                                                             | 20    | 135    | 5,58658E-27  | -2,75489 |

|                      |             |                                                             |  |       |        |              |           |
|----------------------|-------------|-------------------------------------------------------------|--|-------|--------|--------------|-----------|
| <b>CR30055</b>       | FBgn0050055 | FBtr0303919                                                 |  | 13    | 90     | 2,25888E-18  | -2,79141  |
| <b>E2f</b>           | FBgn0011766 | FBtr0084118                                                 |  | 82    | 569    | 1,82339E-113 | -2,79473  |
| <b>Spo</b>           | FBgn0003486 | FBtr0077130                                                 |  | 12    | 91     | 2,20890E-19  | -2,92283  |
| <b>mt:tRNA:Y</b>     | FBgn0013710 | FBtr0100860                                                 |  | 12    | 96     | 9,13081E-21  | -3        |
| <b>CG15406</b>       | FBgn0031517 | FBtr0077580                                                 |  | 17    | 149    | 3,68354E-33  | -3,13171  |
| <b>pncr013:4</b>     | FBgn0262731 | FBtr0303020,FBtr0303021                                     |  | 65    | 623    | 1,52988E-141 | -3,26072  |
| <b>TpnC25D</b>       | FBgn0031692 | FBtr0079063                                                 |  | 18    | 178    | 2,61405E-41  | -3,30581  |
| <b>Act5C</b>         | FBgn0000042 | FBtr0070822,FBtr0100662,FBtr0100663                         |  | 709   | 7183   | 0            | -3,34073  |
| <b>CG8979</b>        | FBgn0033669 | FBtr0088052                                                 |  | 31    | 316    | 2,36749E-73  | -3,34958  |
| <b>CG32016</b>       | FBgn0052016 | FBtr0089234                                                 |  | 21    | 217    | 7,63743E-51  | -3,36923  |
| <b>mt:tRNA:L:UUR</b> | FBgn0013699 | FBtr0100862                                                 |  | 9     | 95     | 1,35926E-22  | -3,39993  |
| <b>mt:ND4</b>        | FBgn0262952 | FBtr0100879                                                 |  | 1109  | 11843  | 0            | -3,41670  |
| <b>CG32016</b>       | FBgn0052016 | FBtr0089230,FBtr0089231                                     |  | 12    | 133    | 3,91783E-32  | -3,47032  |
| <b>CG12990</b>       | FBgn0030859 | FBtr0074479                                                 |  | 18    | 226    | 3,04199E-56  | -3,65025  |
| <b>mt:ND5</b>        | FBgn0013684 | FBtr0100877                                                 |  | 1906  | 26146  | 0            | -3,77797  |
| <b>mt:ND3</b>        | FBgn0013681 | FBtr0100870                                                 |  | 57    | 871    | 1,88953E-226 | -3,93364  |
| <b>CG9259</b>        | FBgn0032913 | FBtr0081464                                                 |  | 13    | 232    | 8,41808E-63  | -4,15754  |
| <b>mt:tRNA:C</b>     | FBgn0013690 | FBtr0100859                                                 |  | 8     | 144    | 3,09840E-39  | -4,16993  |
| <b>Zyx</b>           | FBgn0011642 | FBtr0089214                                                 |  | 14    | 255    | 2,89275E-69  | -4,18700  |
| <b>Zyx</b>           | FBgn0011642 | FBtr0089213,FBtr0089215,FBtr0089216                         |  | 14    | 257    | 6,47050E-70  | -4,19827  |
| <b>Zyx</b>           | FBgn0011642 | FBtr0089210,FBtr0089211,FBtr0089212                         |  | 14    | 257    | 6,47050E-70  | -4,19827  |
| <b>CG10505</b>       | FBgn0034612 | FBtr0071619                                                 |  | 7     | 146    | 6,57442E-41  | -4,38247  |
| <b>mt:ATPase6</b>    | FBgn0013672 | FBtr0100867                                                 |  | 1667  | 36678  | 0            | -4,45959  |
| <b>mt:tRNA:W</b>     | FBgn0013709 | FBtr0100858                                                 |  | 5     | 112    | 6,96342E-32  | -4,48543  |
| <b>mt:tRNA:G</b>     | FBgn0013694 | FBtr0100869                                                 |  | 5     | 115    | 7,21270E-33  | -4,52356  |
| <b>CG15155</b>       | FBgn0032669 | FBtr0081048                                                 |  | 3     | 85     | 3,48753E-25  | -4,82443  |
| <b>Fst</b>           | FBgn0037724 | FBtr0082101                                                 |  | 11    | 374    | 4,24785E-112 | -5,08746  |
| <b>mt:ND1</b>        | FBgn0013679 | FBtr0100886                                                 |  | 268   | 9585   | 0            | -5,16047  |
| <b>CG3264</b>        | FBgn0034712 | FBtr0071781                                                 |  | 10    | 399    | 7,96223E-122 | -5,31832  |
| <b>CG7882</b>        | FBgn0033047 | FBtr0085966                                                 |  | 2     | 81     | 4,83172E-25  | -5,33985  |
| <b>mt:lrRNA</b>      | FBgn0013686 | FBtr0100888                                                 |  | 21890 | 975604 | 0            | -5,47795  |
| <b>Mur18B</b>        | FBgn0030999 | FBtr0074672                                                 |  | 4     | 182    | 1,75026E-56  | -5,50779  |
| <b>CG40351</b>       | FBgn0040022 | FBtr0302243                                                 |  | 2     | 93     | 4,43424E-29  | -5,53916  |
| <b>mt:ATPase8</b>    | FBgn0013673 | FBtr0100866                                                 |  | 290   | 16433  | 0            | -5,82440  |
| <b>CG11892</b>       | FBgn0039313 | FBtr0089644                                                 |  | 4     | 235    | 1,72731E-74  | -5,87652  |
| <b>CG11892</b>       | FBgn0039313 | FBtr0089645                                                 |  | 4     | 235    | 1,72731E-74  | -5,87652  |
| <b>mt:srRNA</b>      | FBgn0013688 | FBtr0100890                                                 |  | 6     | 357    | 3,71141E-113 | -5,89482  |
| <b>mt:ND2</b>        | FBgn0013680 | FBtr0100857                                                 |  | 74    | 5273   | 0            | -6,15495  |
| <b>CG40351</b>       | FBgn0040022 | FBtr0113870,FBtr0113871                                     |  | 2     | 147    | 1,97588E-47  | -6,19967  |
| <b>CG40351</b>       | FBgn0040022 | FBtr0302248                                                 |  | 1     | 75     | 2,36728E-24  | -6,22882  |
| <b>CG40351</b>       | FBgn0040022 | FBtr0113869,FBtr0302244                                     |  | 1     | 75     | 2,36728E-24  | -6,22882  |
| <b>mt:tRNA:L:CUN</b> | FBgn0013698 | FBtr0100887                                                 |  | 14    | 1386   | 0            | -6,62936  |
| <b>mt:ND6</b>        | FBgn0013685 | FBtr0100883                                                 |  | 33    | 3640   | 0            | -6,78533  |
| <b>CG3292</b>        | FBgn0034710 | FBtr0071783                                                 |  | 4     | 462    | 1,82753E-152 | -6,85175  |
| <b>mt:ND4L</b>       | FBgn0013683 | FBtr0100880                                                 |  | 19    | 2698   | 0            | -7,14975  |
| <b>Muc11A</b>        | FBgn0052656 | FBtr0089803                                                 |  | 2     | 378    | 4,55348E-127 | -7,56224  |
| <b>CG42235</b>       | FBgn0250757 | FBtr0290139                                                 |  | 0     | 104    | 5,31274E-36  | -Infinity |
| <b>CG10513</b>       | FBgn0039311 | FBtr0114505                                                 |  | 0     | 78     | 5,38516E-27  | -Infinity |
| <b>CG16727</b>       | FBgn0038719 | FBtr0083780                                                 |  | 0     | 386    | 3,41807E-134 | -Infinity |
| <b>CG17752</b>       | FBgn0038718 | FBtr0083779                                                 |  | 0     | 157    | 2,05423E-54  | -Infinity |
| <b>CG14292</b>       | FBgn0038658 | FBtr0083725                                                 |  | 0     | 55     | 4,66333E-19  | -Infinity |
| <b>CG42235</b>       | FBgn0250757 | FBtr0290140                                                 |  | 0     | 92     | 7,66522E-32  | -Infinity |
| <b>CG42235</b>       | FBgn0250757 | FBtr0290137,FBtr0290138,FBtr0290139,FBtr0290140,FBtr0290141 |  | 0     | 121    | 6,66973E-42  | -Infinity |
| <b>mt:tRNA:P</b>     | FBgn0013702 | FBtr0100882                                                 |  | 0     | 62     | 1,79899E-21  | -Infinity |
| <b>CG10514</b>       | FBgn0039312 | FBtr0084864                                                 |  | 0     | 132    | 9,98338E-46  | -Infinity |
