# Supplementary material for: New Partners in Regulation of Gene Expression: The Enhancer of Trithorax and Polycomb Corto Interacts with Methylated Ribosomal Protein L12 Via Its Chromodomain
Source: PubMed Central journal article supplement (PMC3469418; doi:10.1371/journal.pgen.1003006), 2012-10-11
Supplement: pgen.1003006.s013.pdf [file pgen.1003006.s013.pdf]

Table S9

| sd::Gal4>UAS::FH-cortoCD |                                                                       | Down-regulated genes |                 |          |             |            |
|--------------------------|-----------------------------------------------------------------------|----------------------|-----------------|----------|-------------|------------|
| GO ID                    | Description                                                           | Category             | GO CortoCD down | GO total | padj dh     | Enrichment |
| GO:0006468               | protein phosphorylation                                               | Biological process   | 39              | 545      | 1,63623E-14 | 4,90240    |
| GO:0006355               | regulation of transcription, DNA-dependent                            | Biological process   | 25              | 520      | 4,66378E-06 | 3,29365    |
| GO:0007411               | axon guidance                                                         | Biological process   | 16              | 278      | 7,19313E-05 | 3,94290    |
| GO:0006470               | protein dephosphorylation                                             | Biological process   | 11              | 181      | 9,76596E-04 | 4,16346    |
| GO:0007391               | dorsal closure                                                        | Biological process   | 11              | 222      | 3,63564E-03 | 3,39453    |
| GO:0000910               | cytokinesis                                                           | Biological process   | 10              | 144      | 7,40291E-04 | 4,75749    |
| GO:0007314               | oocyte anterior/posterior axis specification                          | Biological process   | 8               | 38       | 2,62282E-06 | 14,42270   |
| GO:0016339               | calcium-dependent cell-cell adhesion                                  | Biological process   | 8               | 43       | 6,15976E-06 | 12,74560   |
| GO:0008045               | motor axon guidance                                                   | Biological process   | 8               | 58       | 5,06639E-05 | 9,44936    |
| GO:0007623               | circadian rhythm                                                      | Biological process   | 8               | 106      | 1,98046E-03 | 5,17040    |
| GO:0007173               | epidermal growth factor receptor signaling pathway                    | Biological process   | 7               | 51       | 1,75769E-04 | 9,40304    |
| GO:0016319               | mushroom body development                                             | Biological process   | 7               | 88       | 3,00987E-03 | 5,44949    |
| GO:0048096               | chromatin-mediated maintenance of transcription                       | Biological process   | 6               | 21       | 1,33277E-05 | 19,57370   |
| GO:0045197               | establishment or maintenance of epithelial cell apical/basal polarity | Biological process   | 6               | 37       | 2,67995E-04 | 11,10940   |
| GO:0000122               | negative regulation of transcription from RNA polymerase II promoter  | Biological process   | 6               | 81       | 8,93779E-03 | 5,07466    |
| GO:0016325               | oocyte microtubule cytoskeleton organization                          | Biological process   | 5               | 20       | 1,75769E-04 | 17,12700   |
| GO:0007613               | memory                                                                | Biological process   | 5               | 26       | 5,98728E-04 | 13,17460   |
| GO:0016199               | axon midline choice point recognition                                 | Biological process   | 5               | 29       | 9,41246E-04 | 11,81170   |
| GO:0007279               | pole cell formation                                                   | Biological process   | 5               | 36       | 2,15059E-03 | 9,51498    |
| GO:0006897               | endocytosis                                                           | Biological process   | 5               | 49       | 6,23756E-03 | 6,99060    |
| GO:0045879               | negative regulation of smoothened signaling pathway                   | Biological process   | 4               | 19       | 1,99002E-03 | 14,42270   |
| GO:0006471               | protein ADP-ribosylation                                              | Biological process   | 4               | 21       | 2,59000E-03 | 13,04910   |
| GO:0016458               | gene silencing                                                        | Biological process   | 4               | 32       | 9,28695E-03 | 8,56348    |
| GO:0008284               | positive regulation of cell proliferation                             | Biological process   | 4               | 32       | 9,28695E-03 | 8,56348    |
| GO:0045196               | establishment or maintenance of neuroblast polarity                   | Biological process   | 3               | 10       | 3,76314E-03 | 20,55240   |
| GO:0010628               | positive regulation of gene expression                                | Biological process   | 3               | 11       | 4,95626E-03 | 18,68400   |
| GO:0008069               | dorsal/ventral axis specification, ovarian follicular epithelium      | Biological process   | 3               | 11       | 4,95626E-03 | 18,68400   |
| GO:0035293               | chitin-based larval cuticle pattern formation                         | Biological process   | 3               | 12       | 6,20375E-03 | 17,12700   |
| GO:0046665               | amnioserosa maintenance                                               | Biological process   | 3               | 13       | 7,13897E-03 | 15,80950   |
| GO:0006541               | glutamine metabolic process                                           | Biological process   | 3               | 13       | 7,13897E-03 | 15,80950   |
| GO:0006508               | proteolysis                                                           | Biological process   | 1               | 767      | 1,62465E-03 | 0,08932    |
| GO:0004674               | protein serine/threonine kinase activity                              | Molecular function   | 35              | 373      | 2,57122E-16 | 6,42835    |
| GO:0003700               | sequence-specific DNA binding transcription factor activity           | Molecular function   | 26              | 570      | 6,38596E-06 | 3,12492    |
| GO:0003677               | DNA binding                                                           | Molecular function   | 22              | 720      | 5,29163E-03 | 2,09330    |
| GO:0008137               | NADH dehydrogenase (ubiquinone) activity                              | Molecular function   | 19              | 52       | 2,04418E-19 | 25,03170   |
| GO:0003729               | mRNA binding                                                          | Molecular function   | 14              | 275      | 7,30575E-04 | 3,48767    |
| GO:0005154               | epidermal growth factor receptor binding                              | Molecular function   | 10              | 18       | 2,12265E-12 | 38,05990   |
| GO:0000166               | nucleotide binding                                                    | Molecular function   | 10              | 179      | 2,80619E-03 | 3,82725    |
| GO:0008143               | poly(A) RNA binding                                                   | Molecular function   | 9               | 13       | 2,19504E-12 | 47,42850   |
| GO:0004129               | cytochrome-c oxidase activity                                         | Molecular function   | 9               | 42       | 4,55577E-07 | 14,68030   |
| GO:0004879               | ligand-dependent nuclear receptor activity                            | Molecular function   | 8               | 65       | 9,51982E-05 | 8,43174    |
| GO:0004714               | transmembrane receptor protein tyrosine kinase activity               | Molecular function   | 7               | 30       | 6,60813E-06 | 15,98520   |
| GO:0004683               | calmodulin-dependent protein kinase activity                          | Molecular function   | 6               | 9        | 5,63042E-08 | 45,67190   |
| GO:0003714               | transcription corepressor activity                                    | Molecular function   | 6               | 35       | 2,08578E-04 | 11,74420   |
| GO:0005516               | calmodulin binding                                                    | Molecular function   | 6               | 53       | 1,61019E-03 | 7,75561    |
| GO:0042393               | histone binding                                                       | Molecular function   | 5               | 15       | 5,06639E-05 | 22,83600   |
| GO:0005044               | scavenger receptor activity                                           | Molecular function   | 5               | 42       | 3,63564E-03 | 8,15570    |
| GO:0004385               | guanylate kinase activity                                             | Molecular function   | 4               | 14       | 7,27467E-04 | 19,57370   |
| GO:0004708               | MAP kinase kinase activity                                            | Molecular function   | 4               | 17       | 1,38802E-03 | 16,11950   |
| GO:0008187               | poly-pyrimidine tract binding                                         | Molecular function   | 3               | 13       | 7,13897E-03 | 15,80950   |
| GO:0005001               | transmembrane receptor protein tyrosine phosphatase activity          | Molecular function   | 3               | 14       | 8,74457E-03 | 14,68030   |
| GO:0005634               | nucleus                                                               | Cellular component   | 73              | 1905     | 6,47121E-14 | 2,62524    |
| GO:0005886               | plasma membrane                                                       | Cellular component   | 36              | 594      | 2,03122E-11 | 4,15199    |
| GO:0005739               | mitochondrion                                                         | Cellular component   | 25              | 333      | 1,35150E-09 | 5,14323    |
| GO:0005811               | lipid particle                                                        | Cellular component   | 20              | 339      | 4,01418E-06 | 4,04176    |
| GO:0005921               | gap junction                                                          | Cellular component   | 8               | 31       | 6,10760E-07 | 17,67940   |
| GO:0005747               | mitochondrial respiratory chain complex I                             | Cellular component   | 7               | 71       | 1,10459E-03 | 6,75430    |
| GO:0045169               | fusome                                                                | Cellular component   | 5               | 54       | 8,93779E-03 | 6,34332    |
| GO:0016323               | basolateral plasma membrane                                           | Cellular component   | 4               | 16       | 1,10459E-03 | 17,12700   |
| GO:0043186               | P granule                                                             | Cellular component   | 4               | 31       | 8,73491E-03 | 8,83972    |
