# Supplementary material for: New Partners in Regulation of Gene Expression: The Enhancer of Trithorax and Polycomb Corto Interacts with Methylated Ribosomal Protein L12 Via Its Chromodomain
Source: PubMed Central journal article supplement (PMC3469418; doi:10.1371/journal.pgen.1003006), 2012-10-11
Supplement: pgen.1003006.s014.pdf [file pgen.1003006.s014.pdf]

Table S10

| sd::Gal4>UAS::Rpl12-Myc |                                                                              | Up-regulated genes |             |          |             |            |
|-------------------------|------------------------------------------------------------------------------|--------------------|-------------|----------|-------------|------------|
| GO ID                   | Description                                                                  | Category           | GO Rpl12 up | GO total | padj dh     | Enrichment |
| GO:0006412              | translation                                                                  | Biological process | 90          | 511      | 7.27440E-47 | 6,58457    |
| GO:0006508              | proteolysis                                                                  | Biological process | 36          | 767      | 4.01363E-03 | 1,75474    |
| GO:0007052              | mitotic spindle organization                                                 | Biological process | 35          | 209      | 1.70654E-16 | 6,26077    |
| GO:0000022              | mitotic spindle elongation                                                   | Biological process | 32          | 84       | 8.16536E-27 | 14,24220   |
| GO:0009408              | response to heat                                                             | Biological process | 23          | 93       | 1.87494E-14 | 9,24593    |
| GO:0008340              | determination of adult lifespan                                              | Biological process | 20          | 160      | 3.83347E-07 | 4,67321    |
| GO:0048813              | dendrite morphogenesis                                                       | Biological process | 17          | 197      | 3.51081E-04 | 3,22618    |
| GO:0007411              | axon guidance                                                                | Biological process | 17          | 278      | 7.52396E-03 | 2,28618    |
| GO:0007424              | open tracheal system development                                             | Biological process | 15          | 182      | 1.21880E-03 | 3,08124    |
| GO:0001666              | response to hypoxia                                                          | Biological process | 13          | 41       | 1.62555E-09 | 11,85400   |
| GO:0015992              | proton transport                                                             | Biological process | 12          | 40       | 1.75521E-08 | 11,21570   |
| GO:0006367              | transcription initiation from RNA polymerase II promoter                     | Biological process | 11          | 132      | 5.97420E-03 | 3,11548    |
| GO:0006457              | protein folding                                                              | Biological process | 11          | 140      | 8.22940E-03 | 2,93745    |
| GO:0007015              | actin filament organization                                                  | Biological process | 10          | 79       | 6.98586E-04 | 4,73237    |
| GO:0006511              | ubiquitin-dependent protein catabolic process                                | Biological process | 10          | 83       | 9.78955E-04 | 4,50430    |
| GO:0006120              | mitochondrial electron transport, NADH to ubiquinone                         | Biological process | 9           | 34       | 6.59158E-06 | 9,89622    |
| GO:0016339              | calcium-dependent cell-cell adhesion                                         | Biological process | 9           | 43       | 4.27003E-05 | 7,82492    |
| GO:0007409              | axonogenesis                                                                 | Biological process | 9           | 77       | 2.27425E-03 | 4,36976    |
| GO:0006413              | translational initiation                                                     | Biological process | 9           | 92       | 5.97420E-03 | 3,65730    |
| GO:0006414              | translational elongation                                                     | Biological process | 8           | 35       | 7.13606E-05 | 8,54531    |
| GO:0042067              | establishment of ommatidial planar polarity                                  | Biological process | 8           | 45       | 3.75813E-04 | 6,64635    |
| GO:0001736              | establishment of planar polarity                                             | Biological process | 8           | 55       | 1.24435E-03 | 5,43792    |
| GO:0016579              | protein deubiquitination                                                     | Biological process | 7           | 19       | 1.20699E-05 | 13,77370   |
| GO:0015986              | ATP synthesis coupled proton transport                                       | Biological process | 7           | 25       | 7.13606E-05 | 10,46800   |
| GO:0016458              | gene silencing                                                               | Biological process | 7           | 32       | 3.51081E-04 | 8,17813    |
| GO:0008587              | imaginal disc-derived wing margin morphogenesis                              | Biological process | 7           | 38       | 9.11490E-04 | 6,88684    |
| GO:0016203              | muscle attachment                                                            | Biological process | 7           | 40       | 1.11856E-03 | 6,54250    |
| GO:0007156              | homophilic cell adhesion                                                     | Biological process | 7           | 46       | 2.27425E-03 | 5,68913    |
| GO:0008149              | behavioral response to ethanol                                               | Biological process | 7           | 50       | 3.45183E-03 | 5,23400    |
| GO:0007474              | imaginal disc-derived wing vein specification                                | Biological process | 7           | 52       | 4.13972E-03 | 5,03269    |
| GO:0006123              | mitochondrial electron transport, cytochrome c to oxygen                     | Biological process | 6           | 17       | 8.09576E-05 | 13,19500   |
| GO:0001737              | establishment of imaginal disc-derived wing hair orientation                 | Biological process | 6           | 37       | 4.01363E-03 | 6,06255    |
| GO:0045197              | establishment or maintenance of epithelial cell apical/basal polarity        | Biological process | 6           | 37       | 4.01363E-03 | 6,06255    |
| GO:0006417              | regulation of translation                                                    | Biological process | 5           | 17       | 9.78955E-04 | 10,99580   |
| GO:0035159              | regulation of tube length, open tracheal system                              | Biological process | 5           | 27       | 5.96129E-03 | 6,92328    |
| GO:0042051              | compound eye photoreceptor development                                       | Biological process | 5           | 28       | 6.47966E-03 | 6,67602    |
| GO:0042066              | perineurial glial growth                                                     | Biological process | 4           | 11       | 1.91047E-03 | 13,59480   |
| GO:0006122              | mitochondrial electron transport, ubiquinol to cytochrome c                  | Biological process | 4           | 13       | 3.36270E-03 | 11,50330   |
| GO:0007519              | skeletal muscle tissue development                                           | Biological process | 4           | 15       | 5.37984E-03 | 9,96952    |
| GO:0046331              | lateral inhibition                                                           | Biological process | 4           | 16       | 6.44084E-03 | 9,34643    |
| GO:0019933              | cAMP-mediated signaling                                                      | Biological process | 4           | 18       | 8.80931E-03 | 8,30794    |
| GO:0006468              | protein phosphorylation                                                      | Biological process | 3           | 545      | 2.27425E-03 | 0,20579    |
| GO:0003735              | structural constituent of ribosome                                           | Molecular function | 115         | 326      | 1.08289E-98 | 13,18820   |
| GO:0005524              | ATP binding                                                                  | Molecular function | 35          | 714      | 2.50026E-03 | 1,83263    |
| GO:0003779              | actin binding                                                                | Molecular function | 29          | 202      | 7.60716E-12 | 5,36726    |
| GO:0008553              | hydrogen-exporting ATPase activity, phosphorylative mechanism                | Molecular function | 27          | 113      | 1.36658E-16 | 8,93287    |
| GO:0005200              | structural constituent of cytoskeleton                                       | Molecular function | 14          | 67       | 9.58383E-08 | 7,81194    |
| GO:0004129              | cytochrome-c oxidase activity                                                | Molecular function | 12          | 42       | 3.11327E-08 | 10,68160   |
| GO:0042623              | ATPase activity, coupled                                                     | Molecular function | 10          | 87       | 1.25097E-03 | 4,29721    |
| GO:0003743              | translation initiation factor activity                                       | Molecular function | 10          | 113      | 6.46167E-03 | 3,30847    |
| GO:0003954              | NADH dehydrogenase activity                                                  | Molecular function | 9           | 37       | 1.25147E-05 | 9,09382    |
| GO:0003746              | translation elongation factor activity                                       | Molecular function | 9           | 37       | 1.25147E-05 | 9,09382    |
| GO:0008017              | microtubule binding                                                          | Molecular function | 9           | 88       | 4.79116E-03 | 3,82354    |
| GO:0004175              | endopeptidase activity                                                       | Molecular function | 9           | 88       | 4.79116E-03 | 3,82354    |
| GO:0003713              | transcription coactivator activity                                           | Molecular function | 8           | 44       | 3.51081E-04 | 6,79740    |
| GO:0008137              | NADH dehydrogenase (ubiquinone) activity                                     | Molecular function | 8           | 52       | 9.76577E-04 | 5,75165    |
| GO:0008010              | structural constituent of chitin-based larval cuticle                        | Molecular function | 8           | 61       | 2.27425E-03 | 4,90304    |
| GO:0016887              | ATPase activity                                                              | Molecular function | 7           | 54       | 4.97431E-03 | 4,84630    |
| GO:0004013              | adenosylhomocysteine activity                                                | Molecular function | 6           | 9        | 1.18288E-06 | 24,92380   |
| GO:0004385              | guanylate kinase activity                                                    | Molecular function | 5           | 14       | 3.94988E-04 | 13,35200   |
| GO:0008092              | cytoskeletal protein binding                                                 | Molecular function | 5           | 30       | 8.22940E-03 | 6,23095    |
| GO:0005041              | low-density lipoprotein receptor activity                                    | Molecular function | 4           | 12       | 2.50026E-03 | 12,46190   |
| GO:0004843              | ubiquitin-specific protease activity                                         | Molecular function | 4           | 13       | 3.36270E-03 | 11,50330   |
| GO:0008121              | ubiquinol-cytochrome-c reductase activity                                    | Molecular function | 4           | 18       | 8.80931E-03 | 8,30794    |
| GO:0005811              | lipid particle                                                               | Cellular component | 79          | 339      | 4.47378E-50 | 8,71231    |
| GO:0005875              | microtubule associated complex                                               | Cellular component | 49          | 359      | 1.91400E-19 | 5,10279    |
| GO:0022627              | cytosolic small ribosomal subunit                                            | Cellular component | 39          | 63       | 1.18762E-43 | 23,14350   |
| GO:0022625              | cytosolic large ribosomal subunit                                            | Cellular component | 39          | 79       | 2.21393E-38 | 18,45620   |
| GO:0005737              | cytoplasm                                                                    | Cellular component | 39          | 859      | 4.29338E-03 | 1,69737    |
| GO:0005840              | ribosome                                                                     | Cellular component | 25          | 65       | 6.93650E-21 | 14,37910   |
| GO:0005739              | mitochondrion                                                                | Cellular component | 22          | 333      | 9.78955E-04 | 2,46993    |
| GO:0005747              | mitochondrial respiratory chain complex I                                    | Cellular component | 14          | 71       | 2.01709E-07 | 7,37183    |
| GO:0005751              | mitochondrial respiratory chain complex IV                                   | Cellular component | 10          | 24       | 1.39890E-08 | 15,57740   |
| GO:0005578              | proteinaceous extracellular matrix                                           | Cellular component | 10          | 62       | 1.09686E-04 | 6,02995    |
| GO:0030018              | Z disc                                                                       | Cellular component | 8           | 24       | 4.85239E-06 | 12,46190   |
| GO:0000276              | mitochondrial proton-transporting ATP synthase complex, coupling factor F1F0 | Cellular component | 7           | 17       | 5.0267E-06  | 15,39410   |
| GO:0005750              | mitochondrial respiratory chain complex III                                  | Cellular component | 6           | 20       | 2.17718E-04 | 11,21570   |
| GO:0005884              | actin filament                                                               | Cellular component | 6           | 29       | 1.27088E-03 | 7,73498    |
| GO:0005850              | eukaryotic translation initiation factor 2 complex                           | Cellular component | 5           | 11       | 1.24633E-04 | 16,99350   |
| GO:0016585              | chromatin remodeling complex                                                 | Cellular component | 4           | 9        | 9.72184E-04 | 16,61590   |
| GO:0005832              | chaperonin-containing T-complex                                              | Cellular component | 4           | 10       | 1.27088E-03 | 14,95430   |
| GO:0005853              | eukaryotic translation elongation factor 1 complex                           | Cellular component | 4           | 13       | 3.36270E-03 | 11,50330   |

Coleno
