# Supplementary material for: New Partners in Regulation of Gene Expression: The Enhancer of Trithorax and Polycomb Corto Interacts with Methylated Ribosomal Protein L12 Via Its Chromodomain
Source: PubMed Central journal article supplement (PMC3469418; doi:10.1371/journal.pgen.1003006), 2012-10-11
Supplement: pgen.1003006.s015.pdf [file pgen.1003006.s015.pdf]

Table S11

| sd::Gal4>UAS::Rpl12-Myc |                                                                       | Down-regulated genes |               |          |             |            |  |
|-------------------------|-----------------------------------------------------------------------|----------------------|---------------|----------|-------------|------------|--|
| GO ID                   | Description                                                           | Category             | GO Rpl12 down | GO total | padj dh     | Enrichment |  |
| GO:0006468              | protein phosphorylation                                               | Biological process   | 57            | 545      | 4.69367E-23 | 5.22337    |  |
| GO:0006355              | regulation of transcription, DNA-dependent                            | Biological process   | 32            | 520      | 6.74682E-07 | 3.07340    |  |
| GO:0006470              | protein dephosphorylation                                             | Biological process   | 19            | 181      | 2.56991E-07 | 5.24261    |  |
| GO:0007411              | axon guidance                                                         | Biological process   | 19            | 278      | 6.72468E-05 | 3.41335    |  |
| GO:0048477              | oogenesis                                                             | Biological process   | 17            | 367      | 6.03879E-03 | 2.31342    |  |
| GO:0007391              | dorsal closure                                                        | Biological process   | 15            | 222      | 5.75198E-04 | 3.37451    |  |
| GO:0006413              | translational initiation                                              | Biological process   | 13            | 92       | 1.66781E-06 | 7.05713    |  |
| GO:0016055              | Wnt receptor signaling pathway                                        | Biological process   | 12            | 117      | 8.31679E-05 | 5.12233    |  |
| GO:0007476              | imaginal disc-derived wing morphogenesis                              | Biological process   | 12            | 173      | 1.87101E-03 | 3.46424    |  |
| GO:0007173              | epidermal growth factor receptor signaling pathway                    | Biological process   | 11            | 51       | 2.77660E-07 | 10.77200   |  |
| GO:0000381              | regulation of alternative nuclear mRNA splicing, via spliceosome      | Biological process   | 11            | 72       | 6.55709E-06 | 7.63014    |  |
| GO:0000122              | negative regulation of transcription from RNA polymerase II promoter  | Biological process   | 11            | 81       | 1.83948E-05 | 6.78235    |  |
| GO:0007155              | cell adhesion                                                         | Biological process   | 11            | 141      | 1.34620E-03 | 3.89624    |  |
| GO:0007314              | oocyte anterior/posterior axis specification                          | Biological process   | 10            | 38       | 2.29308E-07 | 13.14280   |  |
| GO:0007399              | nervous system development                                            | Biological process   | 10            | 133      | 2.92065E-03 | 3.75509    |  |
| GO:0006915              | apoptosis                                                             | Biological process   | 10            | 136      | 3.26456E-03 | 3.67226    |  |
| GO:0000910              | cytokinesis                                                           | Biological process   | 10            | 144      | 4.28099E-03 | 3.46825    |  |
| GO:0008045              | motor axon guidance                                                   | Biological process   | 9             | 58       | 5.54803E-05 | 7.74974    |  |
| GO:0007224              | smoothed signaling pathway                                            | Biological process   | 9             | 82       | 5.75198E-04 | 5.48152    |  |
| GO:0007298              | border follicle cell migration                                        | Biological process   | 9             | 130      | 7.16409E-03 | 3.45757    |  |
| GO:0048749              | compound eye development                                              | Biological process   | 9             | 134      | 8.07655E-03 | 3.35436    |  |
| GO:0016339              | calcium-dependent cell-cell adhesion                                  | Biological process   | 8             | 43       | 5.25417E-05 | 9.29167    |  |
| GO:0045944              | positive regulation of transcription from RNA polymerase II promoter  | Biological process   | 8             | 62       | 5.40715E-04 | 6.44423    |  |
| GO:0007602              | phototransduction                                                     | Biological process   | 8             | 85       | 2.87563E-03 | 4.70049    |  |
| GO:0016319              | mushroom body development                                             | Biological process   | 8             | 88       | 3.23070E-03 | 4.54025    |  |
| GO:0008360              | regulation of cell shape                                              | Biological process   | 8             | 100      | 5.86915E-03 | 3.95542    |  |
| GO:0007623              | circadian rhythm                                                      | Biological process   | 8             | 106      | 7.71901E-03 | 3.76926    |  |
| GO:0007064              | mitotic sister chromatid cohesion                                     | Biological process   | 7             | 10       | 1.42119E-08 | 34.95990   |  |
| GO:0016199              | axon midline choice point recognition                                 | Biological process   | 7             | 29       | 3.97220E-05 | 12.05510   |  |
| GO:0045746              | negative regulation of Notch signaling pathway                        | Biological process   | 7             | 33       | 8.03797E-05 | 10.59390   |  |
| GO:0045197              | establishment or maintenance of epithelial cell apical/basal polarity | Biological process   | 7             | 37       | 1.59120E-04 | 9.48863    |  |
| GO:0008293              | torso signaling pathway                                               | Biological process   | 7             | 43       | 3.82851E-04 | 8.13021    |  |
| GO:0007268              | synaptic transmission                                                 | Biological process   | 7             | 62       | 2.42711E-03 | 5.63870    |  |
| GO:0030707              | ovarian follicle cell development                                     | Biological process   | 7             | 65       | 2.92065E-03 | 5.37845    |  |
| GO:0048096              | chromatin-mediated maintenance of transcription                       | Biological process   | 6             | 21       | 6.72468E-05 | 14.26940   |  |
| GO:0008284              | positive regulation of cell proliferation                             | Biological process   | 6             | 32       | 5.89399E-04 | 9.36427    |  |
| GO:0007279              | pole cell formation                                                   | Biological process   | 6             | 36       | 1.01318E-03 | 8.32379    |  |
| GO:0008587              | imaginal disc-derived wing margin morphogenesis                       | Biological process   | 6             | 38       | 1.23771E-03 | 7.88570    |  |
| GO:0030718              | germ-line stem cell maintenance                                       | Biological process   | 6             | 39       | 1.39728E-03 | 7.68350    |  |
| GO:0051726              | regulation of cell cycle                                              | Biological process   | 6             | 49       | 3.68634E-03 | 6.11544    |  |
| GO:0046843              | dorsal appendage formation                                            | Biological process   | 6             | 51       | 4.00089E-03 | 5.87562    |  |
| GO:0007474              | imaginal disc-derived wing vein specification                         | Biological process   | 6             | 52       | 4.34342E-03 | 5.76262    |  |
| GO:0002121              | inter-male aggressive behavior                                        | Biological process   | 6             | 58       | 6.87108E-03 | 5.16649    |  |
| GO:0016325              | oocyte microtubule cytoskeleton organization                          | Biological process   | 5             | 20       | 6.06526E-04 | 12.48570   |  |
| GO:0007169              | transmembrane receptor protein tyrosine kinase signaling pathway      | Biological process   | 5             | 20       | 6.06526E-04 | 12.48570   |  |
| GO:0030713              | ovarian follicle cell stalk formation                                 | Biological process   | 5             | 20       | 6.06526E-04 | 12.48570   |  |
| GO:0008101              | decapentaplegic receptor signaling pathway                            | Biological process   | 5             | 23       | 1.06795E-03 | 10.85710   |  |
| GO:0007613              | memory                                                                | Biological process   | 5             | 26       | 1.77020E-03 | 9.60437    |  |
| GO:0008286              | insulin receptor signaling pathway                                    | Biological process   | 5             | 36       | 5.36510E-03 | 6.93649    |  |
| GO:0007294              | germarium-derived oocyte fate determination                           | Biological process   | 5             | 40       | 7.71901E-03 | 6.24284    |  |
| GO:0019730              | antimicrobial humoral response                                        | Biological process   | 5             | 42       | 8.54005E-03 | 5.94557    |  |
| GO:0008069              | dorsal/ventral axis specification, ovarian follicular epithelium      | Biological process   | 4             | 11       | 7.31454E-04 | 18.16100   |  |
| GO:0045926              | negative regulation of growth                                         | Biological process   | 4             | 11       | 7.31454E-04 | 18.16100   |  |
| GO:0010628              | positive regulation of gene expression                                | Biological process   | 4             | 11       | 7.31454E-04 | 18.16100   |  |
| GO:0031290              | retinal ganglion cell axon guidance                                   | Biological process   | 4             | 12       | 1.01318E-03 | 16.64760   |  |
| GO:0048132              | female germ-line stem cell division                                   | Biological process   | 4             | 15       | 2.13635E-03 | 13.31810   |  |
| GO:0046331              | lateral inhibition                                                    | Biological process   | 4             | 16       | 2.66674E-03 | 12.48570   |  |
| GO:0046621              | negative regulation of organ growth                                   | Biological process   | 4             | 17       | 3.06087E-03 | 11.75120   |  |
| GO:0045879              | negative regulation of smoothed signaling pathway                     | Biological process   | 4             | 19       | 4.00089E-03 | 10.51430   |  |
| GO:0006471              | protein ADP-ribosylation                                              | Biological process   | 4             | 21       | 5.65133E-03 | 9.51290    |  |
| GO:0000165              | MAPKKK cascade                                                        | Biological process   | 4             | 24       | 8.07655E-03 | 8.32379    |  |
| GO:0016360              | sensory organ precursor cell fate determination                       | Biological process   | 4             | 25       | 8.78077E-03 | 7.99084    |  |
| GO:0008347              | glial cell migration                                                  | Biological process   | 4             | 26       | 9.79784E-03 | 7.68350    |  |
| GO:0006376              | mRNA splice site selection                                            | Biological process   | 3             | 9        | 5.06747E-03 | 16.64760   |  |
| GO:0045196              | establishment or maintenance of neuroblast polarity                   | Biological process   | 3             | 10       | 6.56233E-03 | 14.98280   |  |
| GO:0046580              | negative regulation of Ras protein signal transduction                | Biological process   | 3             | 10       | 6.56233E-03 | 14.98280   |  |
| GO:0030308              | negative regulation of cell growth                                    | Biological process   | 3             | 12       | 9.48980E-03 | 12.48570   |  |
| GO:0035293              | chitin-based larval cuticle pattern formation                         | Biological process   | 3             | 12       | 9.48980E-03 | 12.48570   |  |
| GO:0006508              | proteolysis                                                           | Biological process   | 2             | 767      | 3.24236E-04 | 0.13023    |  |
| GO:0004674              | protein serine/threonine kinase activity                              | Molecular function   | 48            | 373      | 4.69367E-23 | 6.42695    |  |
| GO:0005515              | protein binding                                                       | Molecular function   | 43            | 705      | 4.52933E-09 | 3.04615    |  |
| GO:0003700              | sequence-specific DNA binding transcription factor activity           | Molecular function   | 34            | 570      | 5.25573E-07 | 2.97904    |  |
| GO:0005524              | ATP binding                                                           | Molecular function   | 30            | 714      | 8.99587E-04 | 2.09843    |  |
| GO:0003677              | DNA binding                                                           | Molecular function   | 29            | 720      | 1.87598E-03 | 2.01158    |  |
| GO:0003729              | mRNA binding                                                          | Molecular function   | 26            | 275      | 4.54822E-09 | 4.72186    |  |
| GO:0008137              | NADH dehydrogenase (ubiquinone) activity                              | Molecular function   | 19            | 52       | 3.01023E-17 | 18.24830   |  |
| GO:0004672              | protein kinase activity                                               | Molecular function   | 16            | 165      | 6.75288E-06 | 4.84293    |  |
| GO:0043565              | sequence-specific DNA binding                                         | Molecular function   | 16            | 267      | 1.03752E-03 | 2.99282    |  |
| GO:0000166              | nucleotide binding                                                    | Molecular function   | 15            | 179      | 6.72468E-05 | 4.18515    |  |
| GO:0005509              | calcium ion binding                                                   | Molecular function   | 14            | 251      | 3.68634E-03 | 2.78565    |  |
| GO:0003743              | translation initiation factor activity                                | Molecular function   | 13            | 113      | 1.29579E-05 | 5.74563    |  |
| GO:0008143              | poly(A) RNA binding                                                   | Molecular function   | 11            | 13       | 2.66284E-15 | 42.25920   |  |
| GO:0004879              | ligand-dependent nuclear receptor activity                            | Molecular function   | 11            | 65       | 2.78185E-06 | 8.45185    |  |
| GO:0005154              | epidermal growth factor receptor binding                              | Molecular function   | 10            | 18       | 5.74607E-11 | 27.74600   |  |
| GO:0003723              | RNA binding                                                           | Molecular function   | 10            | 130      | 2.66674E-03 | 3.84175    |  |
| GO:0004129              | cytochrome-c oxidase activity                                         | Molecular function   | 9             | 42       | 4.83721E-06 | 10.70200   |  |
| GO:0004714              | transmembrane receptor protein tyrosine kinase activity               | Molecular function   | 7             | 30       | 4.92600E-05 | 11.65330   |  |
| GO:0003730              | mRNA 3'-UTR binding                                                   | Molecular function   | 7             | 34       | 9.45156E-05 | 10.28230   |  |
| GO:0005516              | calmodulin binding                                                    | Molecular function   | 7             | 53       | 1.07070E-03 | 6.59621    |  |
| GO:0004722              | protein serine/threonine phosphatase activity                         | Molecular function   | 7             | 84       | 8.07655E-03 | 4.16190    |  |
| GO:0004683              | calmodulin-dependent protein kinase activity                          | Molecular function   | 6             | 9        | 3.38762E-07 | 33.29520   |  |
| GO:0008190              | eukaryotic initiation factor 4E binding                               | Molecular function   | 6             | 15       | 9.95901E-06 | 19.97710   |  |
| GO:0003714              | transcription corepressor activity                                    | Molecular function   | 6             | 35       | 8.89303E-04 | 8.56161    |  |
| GO:0042393              | histone binding                                                       | Molecular function   | 5             | 15       | 1.67326E-04 | 16.64760   |  |
| GO:0008138              | protein tyrosine/serine/threonine phosphatase activity                | Molecular function   | 5             | 37       | 5.89118E-03 | 6.74902    |  |
| GO:0005044              | scavenger receptor activity                                           | Molecular function   | 5             | 42       | 8.54005E-03 | 5.94557    |  |
| GO:0004385              | guanylate kinase activity                                             | Molecular function   | 4             | 14       | 1.71959E-03 | 14.26940   |  |
| GO:0004708              | MAP kinase kinase activity                                            | Molecular function   | 4             | 17       | 3.06087E-03 | 11.75120   |  |
| GO:0004707              | MAP kinase activity                                                   | Molecular function   | 4             | 23       | 7.33059E-03 | 8.68570    |  |
| GO:0019904              | protein domain specific binding                                       | Molecular function   | 3             | 10       | 6.56233E-03 | 14.98280   |  |

|            |                                                     |                    |     |      |             |          |
|------------|-----------------------------------------------------|--------------------|-----|------|-------------|----------|
| GO:0004721 | phosphoprotein phosphatase activity                 | Molecular function | 3   | 12   | 9,48980E-03 | 12,48570 |
| GO:0008601 | protein phosphatase type 2A regulator activity      | Molecular function | 3   | 12   | 9,48980E-03 | 12,48570 |
| GO:0000340 | RNA 7-methylguanosine cap binding                   | Molecular function | 3   | 12   | 9,48980E-03 | 12,48570 |
| GO:0004252 | serine-type endopeptidase activity                  | Molecular function | 1   | 511  | 3,06087E-03 | 0,09774  |
| GO:0005634 | nucleus                                             | Cellular component | 112 | 1905 | 4,66931E-26 | 2,93627  |
| GO:0005886 | plasma membrane                                     | Cellular component | 40  | 594  | 1,37168E-09 | 3,36315  |
| GO:0005737 | cytoplasm                                           | Cellular component | 31  | 859  | 4,60124E-03 | 1,80236  |
| GO:0005739 | mitochondrion                                       | Cellular component | 22  | 333  | 2,39279E-05 | 3,29952  |
| GO:0005921 | gap junction                                        | Cellular component | 8   | 31   | 5,12663E-06 | 12,88850 |
| GO:0008278 | cohesin complex                                     | Cellular component | 7   | 20   | 3,42686E-06 | 17,48000 |
| GO:0030529 | ribonucleoprotein complex                           | Cellular component | 7   | 37   | 1,59120E-04 | 9,44863  |
| GO:0005747 | mitochondrial respiratory chain complex I           | Cellular component | 7   | 71   | 4,00089E-03 | 4,92393  |
| GO:0016028 | rhabdomere                                          | Cellular component | 6   | 47   | 3,06087E-03 | 6,37567  |
| GO:0043234 | protein complex                                     | Cellular component | 6   | 58   | 6,87108E-03 | 5,16649  |
| GO:0016281 | eukaryotic translation initiation factor 4F complex | Cellular component | 5   | 23   | 1,06795E-03 | 10,85710 |
| GO:0005654 | nucleoplasm                                         | Cellular component | 5   | 33   | 3,83253E-03 | 7,56708  |
| GO:0016323 | basolateral plasma membrane                         | Cellular component | 4   | 16   | 2,66674E-03 | 12,48570 |
| GO:0008287 | protein serine/threonine phosphatase complex        | Cellular component | 3   | 10   | 6,56233E-03 | 14,98280 |
