# Supplementary material for: New Partners in Regulation of Gene Expression: The Enhancer of Trithorax and Polycomb Corto Interacts with Methylated Ribosomal Protein L12 Via Its Chromodomain
Source: PubMed Central journal article supplement (PMC3469418; doi:10.1371/journal.pgen.1003006), 2012-10-11
Supplement: pgen.1003006.s016.pdf [file pgen.1003006.s016.pdf]

## Supplementary Table 12: Primers used for constructs and qPCRs.

Note that an ATG and two nuclear localization signals (underlined) were added to the forward and reverse primers of *cortoCD*, respectively. For *RpL12* mutants, the mutated triplet is underlined.

| Constructs       | Forward Primer (5' → 3')              | Reverse Primer (5' → 3')                                                                      |
|------------------|---------------------------------------|-----------------------------------------------------------------------------------------------|
| <i>corto</i>     | CACCATGACGATGGCCGCCTGT                | CACGTTGTAGCAGGAGATCTGCCG                                                                      |
| <i>cortoCD</i>   | CACCAT <u>G</u> CAGCAGCAACACCACCGCCAT | <u>GCCACCTTGCGCTTCTTCTTTGGATCCACCTT</u><br><u>GCGCTTCTTCTTTGGATCCTGCGACATCTGCTG</u><br>GTGCTG |
| <i>cortoΔCD</i>  | GACGGCCAGTCTTAAGCTCGGG                | TACCCGGGCGCTGTTGCTGCTGGCAGTCTG                                                                |
| <i>AbdB-m</i>    | GATTTGTGCTTCGCTCTGTTTCG               | GGCGACACGATGTTTTGATTGTG                                                                       |
| <i>RpL12</i>     | CACCATGCCTCCCAAATTCGACCCAA            | GACCATCTTGCGCAGCAGACGG                                                                        |
| <i>RpL12K3A</i>  | CACCATGCCTCC <u>GC</u> CTTCGACCCAAAC  | GTTGGGTGCGAAG <u>GC</u> GGAGGCATGGTG                                                          |
| <i>RpL12K10A</i> | CACCCGGAAGTT <u>GC</u> CTTGGTGTACCTG  | CAGGTACACCAAG <u>GCA</u> ACTTCCGTTGG                                                          |
| <i>RpL12K39A</i> | GGTCTGTCGCC <u>GC</u> CAAAATCGGTGATG  | CATCACCGATTTT <u>GGC</u> GGGCGACAGACC                                                         |
| <i>RpL12R66A</i> | CCATCCAGAAC <u>GC</u> CCAGGCCGCCATC   | GATGGCGGCCT <u>GGC</u> GTTCTGGATGG                                                            |
| <i>RpL12K82A</i> | CGCTGATCATC <u>GC</u> CGCTCTGAAGGA    | TCCTTCAGAG <u>CGG</u> CGATGATCAGCG                                                            |
| <i>HP1CD</i>     | CACCATGGGCAAGAAAATCGACAA CCC          | TTCTTCGGACTTTCGCTTGGCTTGC                                                                     |
| <i>RpS4</i>      | CACCATGGCTCGTGGCCCAAGAAG              | GTGGGTCTTGGCGGCCAGAC                                                                          |
| <i>RpS10</i>     | CACCATGTTCAATCCAAAAGCCAAT             | ATTGTCGTAGCGAGAAGCAC                                                                          |
| <i>RpS14</i>     | CACCATGGCACCCAGGAAGGCTAAA             | CAGACGACGACCACGGCGAC                                                                          |

  

| PCRs              | Forward Primer (5' → 3')  | Reverse Primer (5' → 3')      |
|-------------------|---------------------------|-------------------------------|
| <i>2Ls</i>        | ATATCCTTAACCCCGGCATC      |                               |
| <i>2La</i>        |                           | TGTGGATCCCATAACCGTTTT         |
| <i>hsp70-200</i>  | TGCCAGAAAGAAAACCTCGAGAAA  |                               |
| <i>hsp70-108</i>  |                           | GACAGAGTGAGAGAGCAATAGTACAGAGA |
| <i>hsp70+4</i>    | CAATTCAAACAAGCAAAGTGAACAC |                               |
| <i>hsp70+112</i>  |                           | TGATTCACTTTAACTTGCACCTTA      |
| <i>hsp70+645</i>  | ATATCTGGGCGAGAGCATCACA    |                               |
| <i>hsp70+718</i>  |                           | GTAGCCTGGCGCTGGGAGTC          |
| <i>hsp70+1649</i> | GGGTGTGCCCCAGATAGAAG      |                               |
| <i>hsp+1754</i>   |                           | TGTCGTTCTTGATCGTGATGTTT       |
