# Supplementary material for: New Partners in Regulation of Gene Expression: The Enhancer of Trithorax and Polycomb Corto Interacts with Methylated Ribosomal Protein L12 Via Its Chromodomain
Source: PubMed Central journal article supplement (PMC3469418; doi:10.1371/journal.pgen.1003006), 2012-10-11
Supplement: pgen.1003006.s017.pdf [file pgen.1003006.s017.pdf]

**Table S13**

| <b>Name</b> | <b>Sequence</b>                                                                    |
|-------------|------------------------------------------------------------------------------------|
| RpL12um     | NH2-PPKFDPT <b>EV</b> KL <b>VY</b> LRC <b>VG</b> GE <b>VGA</b> -COOH               |
| RpL12K3me2  | NH2-PPK( <b>me2</b> )FDPT <b>EV</b> KL <b>VY</b> LRC <b>VG</b> GE <b>VGA</b> -COOH |
| RpL12K3me3  | NH2-PPK( <b>me3</b> )FDPT <b>EV</b> KL <b>VY</b> LRC <b>VG</b> GE <b>VGA</b> -COOH |
| RpL12K10me3 | NH2-PPKFDPT <b>EV</b> K( <b>me3</b> )L <b>VY</b> LRC <b>VG</b> GE <b>VGA</b> -COOH |
| RpL12K3A    | NH2-PPA <b>F</b> FDPT <b>EV</b> KL <b>VY</b> LRC <b>VG</b> GE <b>VGA</b> -COOH     |
