# Supplementary material for: New Partners in Regulation of Gene Expression: The Enhancer of Trithorax and Polycomb Corto Interacts with Methylated Ribosomal Protein L12 Via Its Chromodomain
Source: PubMed Central journal article supplement (PMC3469418; doi:10.1371/journal.pgen.1003006), 2012-10-11
Supplement: pgen.1003006.s018.pdf [file pgen.1003006.s018.pdf]

**Table S14**

| <b>Sample</b>                      | <b>PE1 raw</b> | <b>PE1 QC filter</b> | <b>PE1 uniq align</b> | <b>PE1 transcript</b> | <b>PE2 raw</b> | <b>PE2 QC filter</b> | <b>PE2 uniq align</b> | <b>PE2 transcript</b> |
|------------------------------------|----------------|----------------------|-----------------------|-----------------------|----------------|----------------------|-----------------------|-----------------------|
| <i>w1118</i>                       | 14,959,294     | 13,526,593           | 12,090,029            | 10,916,840            | 14,959,294     | 12,919,001           | 11,501,663            | 10,327,827            |
| <i>sd::Gal4+</i>                   | 20,113,728     | 18,068,426           | 16,281,367            | 14,226,767            | 20,113,728     | 17,801,481           | 15,947,510            | 13,766,500            |
| <i>sd::Gal4&gt;UAS::FH-cortoCD</i> | 27,021,927     | 25,744,406           | 19,924,474            | 17,536,650            | 27,021,927     | 25,501,106           | 19,605,738            | 17,237,366            |
| <i>sd::Gal4&gt;UAS::RpL12-Myc</i>  | 29,352,398     | 27,894,821           | 20,185,717            | 17,976,210            | 29,352,398     | 27,701,450           | 19,827,704            | 17,635,823            |
