# Supplementary material for: New Partners in Regulation of Gene Expression: The Enhancer of Trithorax and Polycomb Corto Interacts with Methylated Ribosomal Protein L12 Via Its Chromodomain
Source: PLoS Genet. 2012 Oct 11;8(10):e1003006. doi: 10.1371/journal.pgen.1003006 (PMC3469418; doi:10.1371/journal.pgen.1003006)
Supplement: Table S5 — Genes down-regulated in sd::Gal4>UAS::FH-cortoCD vs sd::Gal4/+. FC: Fold Change. (PDF) [file pgen.1003006.s009.pdf]

Table S5

| Flybase Gene Symbol  | Flybase ID Genes | Flybase ID Transcripts                                                                                                  | Number of reads<br><i>sd::Gal4&gt;UAS::FH-cortoCD</i> | <i>sd::Gal4/+</i> | Adjusted <i>P</i> -value | log <sub>2</sub> (FC) |
|----------------------|------------------|-------------------------------------------------------------------------------------------------------------------------|-------------------------------------------------------|-------------------|--------------------------|-----------------------|
| <b>CaMKI</b>         | FBgn0016126      | FBtr0089069,FBtr0089066,FBtr0089067,FBtr0089068                                                                         | 250                                                   | 500               | 6,56626E-30              | -1,00000              |
| <b>Atf6</b>          | FBgn0033010      | FBtr0086079,FBtr0086080                                                                                                 | 1038                                                  | 2078              | 4,33038E-122             | -1,00139              |
| <b>CG11266</b>       | FBgn0031883      | FBtr0089637,FBtr0089635,FBtr0089636                                                                                     | 432                                                   | 866               | 1,91378E-51              | -1,00334              |
| <b>CG11266</b>       | FBgn0031883      | FBtr0089638,FBtr0089639,FBtr0089640                                                                                     | 429                                                   | 861               | 3,28916E-51              | -1,00504              |
| <b>eyg</b>           | FBgn0000625      | FBtr0075979                                                                                                             | 248                                                   | 498               | 4,70554E-30              | -1,00581              |
| <b>Dcp2</b>          | FBgn0036534      | FBtr0304975                                                                                                             | 6152                                                  | 12369             | 0,00000E+00              | -1,00760              |
| <b>par-1</b>         | FBgn0260934      | FBtr0100391,FBtr0100392,FBtr0301504                                                                                     | 730                                                   | 1468              | 3,36598E-87              | -1,00788              |
| <b>Scm</b>           | FBgn0003334      | FBtr0082102                                                                                                             | 768                                                   | 1546              | 6,75490E-92              | -1,00936              |
| <b>gish</b>          | FBgn0250823      | FBtr0301304,FBtr0305071,FBtr0305072                                                                                     | 1312                                                  | 2644              | 6,46761E-157             | -1,01095              |
| <b>tna</b>           | FBgn0026160      | FBtr0301658                                                                                                             | 491                                                   | 995               | 4,23945E-60              | -1,01897              |
| <b>Nipped-B</b>      | FBgn0026401      | FBtr0301454,FBtr0301455,FBtr0301456                                                                                     | 572                                                   | 1162              | 2,51391E-70              | -1,02252              |
| <b>RecQ5</b>         | FBgn0027375      | FBtr0075714,FBtr0075715,FBtr0100362                                                                                     | 329                                                   | 669               | 6,64369E-41              | -1,02392              |
| <b>HmgZ</b>          | FBgn0010228      | FBtr0071673,FBtr0071674                                                                                                 | 4231                                                  | 8618              | 0,00000E+00              | -1,02635              |
| <b>CG14135</b>       | FBgn0036193      | FBtr0290309                                                                                                             | 154                                                   | 314               | 9,19721E-20              | -1,02783              |
| <b>CG11486</b>       | FBgn0035397      | FBtr0072998,FBtr0072999,FBtr0073000,FBtr0073001,FBtr0073002,FBtr0073003,FBtr0072991,FBtr0072992,FBtr0113130,FBtr0113131 | 357                                                   | 730               | 5,79395E-45              | -1,03197              |
| <b>CG17528</b>       | FBgn0261387      | FBtr0111276,FBtr0111275,FBtr0111277                                                                                     | 238                                                   | 487               | 2,28810E-30              | -1,03296              |
| <b>Nipped-B</b>      | FBgn0026401      | FBtr0111119,FBtr0111118                                                                                                 | 574                                                   | 1175              | 4,78325E-72              | -1,03354              |
| <b>pho</b>           | FBgn0002521      | FBtr0089204                                                                                                             | 165                                                   | 338               | 2,13210E-21              | -1,03456              |
| <b>CR42722</b>       | FBgn00261639     | FBtr0303009                                                                                                             | 270                                                   | 556               | 6,67483E-35              | -1,04213              |
| <b>heph</b>          | FBgn0011224      | FBtr0085885                                                                                                             | 148                                                   | 305               | 1,32839E-19              | -1,04321              |
| <b>Sap47</b>         | FBgn0013334      | FBtr0083204,FBtr0083205,FBtr0083206,FBtr0083207,FBtr0083208,FBtr0083209,FBtr0083210,FBtr0301655                         | 929                                                   | 1917              | 6,73693E-119             | -1,04510              |
| <b>pAbp</b>          | FBgn0261619      | FBtr0086740                                                                                                             | 788                                                   | 1627              | 3,81698E-101             | -1,04595              |
| <b>Bsg</b>           | FBgn0261822      | FBtr0079570,FBtr0079574,FBtr0079567,FBtr0079566                                                                         | 457                                                   | 944               | 5,02225E-59              | -1,04659              |
| <b>Cklibeta</b>      | FBgn0000259      | FBtr0073558                                                                                                             | 3149                                                  | 6510              | 0,00000E+00              | -1,04776              |
| <b>Gef26</b>         | FBgn0021873      | FBtr0300039                                                                                                             | 176                                                   | 364               | 2,37699E-23              | -1,04836              |
| <b>heph</b>          | FBgn0011224      | FBtr0300268,FBtr0300269                                                                                                 | 234                                                   | 484               | 1,08720E-30              | -1,04850              |
| <b>Bsg</b>           | FBgn0261822      | FBtr0079573                                                                                                             | 474                                                   | 981               | 1,88276E-61              | -1,04937              |
| <b>gro</b>           | FBgn0001139      | FBtr0084962,FBtr0084963,FBtr0084964,FBtr0084965,FBtr0084966,FBtr0302951,FBtr0302952                                     | 926                                                   | 1919              | 6,28211E-120             | -1,05127              |
| <b>l(2)s5379</b>     | FBgn0010704      | FBtr0100673                                                                                                             | 1785                                                  | 3701              | 8,81470E-231             | -1,05199              |
| <b>l(2)s5379</b>     | FBgn0010704      | FBtr0077840                                                                                                             | 1785                                                  | 3702              | 6,09765E-231             | -1,05238              |
| <b>CG971</b>         | FBgn0035253      | FBtr0072806                                                                                                             | 283                                                   | 587               | 2,53582E-37              | -1,05256              |
| <b>hth</b>           | FBgn0001235      | FBtr0082256,FBtr0082254,FBtr0082255,FBtr0082253,FBtr0301345,FBtr0301956                                                 | 2636                                                  | 5471              | 0,00000E+00              | -1,05345              |
| <b>sdt</b>           | FBgn0261873      | FBtr0089978,FBtr0100376,FBtr0111034,FBtr0089975,FBtr0100375,FBtr0089974,FBtr0308218,FBtr0308219,FBtr0308220             | 588                                                   | 1224              | 2,93396E-77              | -1,05772              |
| <b>lolal</b>         | FBgn0022238      | FBtr0086776,FBtr0086777,FBtr0086778,FBtr0086779,FBtr0300483,FBtr0300484,FBtr0305270                                     | 1665                                                  | 3469              | 3,68144E-218             | -1,05900              |
| <b>pncr013:4</b>     | FBgn0262731      | FBtr0091952                                                                                                             | 490                                                   | 1021              | 9,36144E-65              | -1,05913              |
| <b>CG6700</b>        | FBgn0032305      | FBtr0080187                                                                                                             | 2046                                                  | 4276              | 4,15016E-270             | -1,06346              |
| <b>prominin-like</b> | FBgn0026189      | FBtr0073118,FBtr0306258                                                                                                 | 2132                                                  | 4461              | 2,38759E-282             | -1,06516              |
| <b>Pdk1</b>          | FBgn0020386      | FBtr0072464,FBtr0072465                                                                                                 | 739                                                   | 1548              | 1,19573E-98              | -1,06676              |
| <b>CG13025</b>       | FBgn0036660      | FBtr0075346                                                                                                             | 709                                                   | 1486              | 9,81035E-95              | -1,06758              |
| <b>Mitf</b>          | FBgn0263112      | FBtr0307326,FBtr0307327,FBtr0307329,FBtr0307330                                                                         | 239                                                   | 501               | 1,64678E-32              | -1,06780              |
| <b>Bsg</b>           | FBgn0261822      | FBtr0079568,FBtr0079569,FBtr0079571,FBtr0079572                                                                         | 537                                                   | 1126              | 4,67877E-72              | -1,06821              |
| <b>Adar</b>          | FBgn0026086      | FBtr0070299,FBtr0070300,FBtr0100557,FBtr0307895,FBtr0305498                                                             | 196                                                   | 411               | 8,23339E-27              | -1,06828              |
| <b>Cf2</b>           | FBgn0000286      | FBtr0089647,FBtr0089648,FBtr0089649                                                                                     | 528                                                   | 1111              | 1,58197E-71              | -1,07325              |
| <b>bun</b>           | FBgn0259176      | FBtr0299656                                                                                                             | 469                                                   | 987               | 1,25064E-63              | -1,07346              |
| <b>CrebA</b>         | FBgn0004396      | FBtr0075557                                                                                                             | 768                                                   | 1618              | 4,33277E-104             | -1,07503              |
| <b>unk</b>           | FBgn0004395      | FBtr0305573                                                                                                             | 1399                                                  | 2953              | 7,62875E-190             | -1,07779              |
| <b>cib</b>           | FBgn0026084      | FBtr0070641,FBtr0307206                                                                                                 | 10217                                                 | 21574             | 0,00000E+00              | -1,07832              |
| <b>Antp</b>          | FBgn0260642      | FBtr0081654,FBtr0081655                                                                                                 | 477                                                   | 1009              | 1,57313E-65              | -1,08087              |
| <b>Gs1</b>           | FBgn0001142      | FBtr0078115                                                                                                             | 259                                                   | 548               | 5,69284E-36              | -1,08122              |
| <b>Rbp2</b>          | FBgn0262734      | FBtr0074279,FBtr0074280                                                                                                 | 8823                                                  | 18674             | 0,00000E+00              | -1,08169              |
| <b>CG8116</b>        | FBgn0037614      | FBtr0300543                                                                                                             | 164                                                   | 348               | 3,07728E-23              | -1,08539              |
| <b>CG4502</b>        | FBgn0031896      | FBtr0079417                                                                                                             | 384                                                   | 816               | 1,38407E-53              | -1,08746              |
| <b>CG40196</b>       | FBgn0058196      | FBtr0113831                                                                                                             | 253                                                   | 538               | 1,12422E-35              | -1,08847              |
| <b>Sdc</b>           | FBgn0010415      | FBtr0071707,FBtr0301557                                                                                                 | 455                                                   | 968               | 1,56036E-63              | -1,08914              |
| <b>Sdc</b>           | FBgn0010415      | FBtr0071706,FBtr0071705,FBtr0273206,FBtr0273207                                                                         | 453                                                   | 964               | 2,24892E-63              | -1,08952              |
| <b>pncr013:4</b>     | FBgn0262731      | FBtr0303019,FBtr0303020,FBtr0303021                                                                                     | 221                                                   | 471               | 1,85836E-31              | -1,09168              |
| <b>Dyrk3</b>         | FBgn0027101      | FBtr0100406                                                                                                             | 621                                                   | 1324              | 7,11001E-87              | -1,09224              |
| <b>CG4502</b>        | FBgn0031896      | FBtr0079416                                                                                                             | 379                                                   | 809               | 1,56795E-53              | -1,09394              |
| <b>Gs1</b>           | FBgn0001142      | FBtr0300568                                                                                                             | 221                                                   | 474               | 5,98769E-32              | -1,10084              |
| <b>Parp</b>          | FBgn0010247      | FBtr0113885                                                                                                             | 2203                                                  | 4726              | 5,8334E-312              | -1,10115              |
| <b>CG12054</b>       | FBgn0039831      | FBtr0305118                                                                                                             | 1800                                                  | 3863              | 3,19430E-255             | -1,10172              |
| <b>gish</b>          | FBgn0250823      | FBtr0301304,FBtr0083262,FBtr0083261,FBtr0083264,FBtr0100331,FBtr0100332,FBtr0100333,FBtr0305071,FBtr0305072             | 160                                                   | 344               | 2,05306E-23              | -1,10434              |
| <b>CG11180</b>       | FBgn0034528      | FBtr0086254                                                                                                             | 678                                                   | 1463              | 6,48815E-98              | -1,10957              |
|                      |                  | FBtr0301360,FBtr0301361                                                                                                 | 3239                                                  | 6999              | 0,00000E+00              | -1,11160              |
|                      |                  | FBtr0303296                                                                                                             | 3239                                                  | 6999              | 0,00000E+00              | -1,11160              |
| <b>CG1115</b>        | FBgn0037299      | FBtr0305001                                                                                                             | 148                                                   | 320               | 3,52764E-22              | -1,11247              |
| <b>Cf2</b>           | FBgn0000286      | FBtr0304887                                                                                                             | 539                                                   | 1166              | 1,49484E-78              | -1,11321              |
| <b>hth</b>           | FBgn0001235      | FBtr0100454                                                                                                             | 4826                                                  | 10441             | 0,00000E+00              | -1,11336              |
| <b>A2bp1</b>         | FBgn0052062      | FBtr0305093,FBtr0305096                                                                                                 | 1616                                                  | 3499              | 1,32866E-234             | -1,11452              |
| <b>CG1115</b>        | FBgn0037299      | FBtr0078777,FBtr0305002                                                                                                 | 168                                                   | 364               | 3,64102E-25              | -1,11548              |
| <b>akirin</b>        | FBgn0082598      | FBtr0302544                                                                                                             | 4448                                                  | 9640              | 0,00000E+00              | -1,11588              |

|                      |              |                                                                                                 |       |       |              |          |
|----------------------|--------------|-------------------------------------------------------------------------------------------------|-------|-------|--------------|----------|
| <b>myoglianin</b>    | FBgn0026199  | FBtr0089092,FBtr0089093,FBtr0089094,FBtr0089095                                                 | 1167  | 2537  | 2,67258E-171 | -1,12032 |
| <b>how</b>           | FBgn0017397  | FBtr0084177                                                                                     | 1913  | 4160  | 9,86398E-281 | -1,12075 |
| <b>UbcD2</b>         | FBgn0015320  | FBtr0080115,FBtr0080116                                                                         | 870   | 1897  | 7,55026E-129 | -1,12463 |
| <b>shi</b>           | FBgn0003392  | FBtr0111036,FBtr0111037,FBtr0074118,FBtr0074119,FBtr0074121,FBtr0074122,FBtr0301597             | 596   | 1300  | 1,27784E-88  | -1,12513 |
| <b>cals</b>          | FBgn0039928  | FBtr0089207                                                                                     | 142   | 310   | 9,62498E-22  | -1,12638 |
| <b>R</b>             | FBgn0004636  | FBtr0072867,FBtr0303154                                                                         | 5306  | 11589 | 0,00000E+00  | -1,12706 |
| <b>Mkk4</b>          | FBgn0024326  | FBtr0300443                                                                                     | 788   | 1722  | 1,43309E-117 | -1,12782 |
| <b>Nos</b>           | FBgn0011676  | FBtr0100484                                                                                     | 513   | 1126  | 1,30630E-77  | -1,13418 |
| <b>Sh3beta</b>       | FBgn0035772  | FBtr0302548                                                                                     | 225   | 495   | 1,00933E-34  | -1,13750 |
| <b>bowl</b>          | FBgn0004893  | FBtr0077490,FBtr0077491,FBtr0077492,FBtr0307026,FBtr0307027,FBtr0307028,FBtr0307029             | 539   | 1186  | 4,81152E-82  | -1,13775 |
| <b>Mkk4</b>          | FBgn0024326  | FBtr0081892                                                                                     | 827   | 1820  | 1,76362E-125 | -1,13798 |
| <b>ogre</b>          | FBgn0004646  | FBtr0071036                                                                                     | 1968  | 4345  | 2,41522E-300 | -1,14263 |
| <b>CG5059</b>        | FBgn0037007  | FBtr0078216,FBtr0078217,FBtr0078218,FBtr0078219                                                 | 1265  | 2794  | 1,97969E-193 | -1,14319 |
| <b>Dsp1</b>          | FBgn0011764  | FBtr0089262,FBtr0289960                                                                         | 1896  | 4190  | 3,74759E-290 | -1,14399 |
| <b>Dyb</b>           | FBgn0033739  | FBtr0087930,FBtr0087929,FBtr0100298,FBtr0305077                                                 | 275   | 608   | 8,95658E-43  | -1,14464 |
| <b>TBPH</b>          | FBgn0025790  | FBtr0089624,FBtr0089626,FBtr0089627,FBtr0301643,FBtr0301644                                     | 161   | 356   | 2,60566E-25  | -1,14482 |
| <b>Ptp10D</b>        | FBgn0004370  | FBtr0073524,FBtr0273235                                                                         | 861   | 1904  | 2,33165E-132 | -1,14495 |
| <b>elF5</b>          | FBgn0030719  | FBtr0074147,FBtr0074146,FBtr0074144,FBtr0074148,FBtr0074145,FBtr0074150                         | 164   | 363   | 7,16997E-26  | -1,14627 |
| <b>prominin-like</b> | FBgn0026189  | FBtr0073119,FBtr0073120                                                                         | 966   | 2144  | 1,12338E-149 | -1,15021 |
| <b>Cklalpha</b>      | FBgn0015024  | FBtr0073681,FBtr0073682,FBtr0300380                                                             | 5036  | 11209 | 0,00000E+00  | -1,15431 |
| <b>CR42723</b>       | FBgn00261640 | FBtr0303010                                                                                     | 237   | 528   | 1,27183E-37  | -1,15565 |
| <b>Galpha49B</b>     | FBgn0004435  | FBtr0087829,FBtr0087830                                                                         | 417   | 930   | 7,93344E-66  | -1,15718 |
| <b>kn</b>            | FBgn0001319  | FBtr0087465,FBtr0112810,FBtr0301400                                                             | 257   | 575   | 2,83418E-41  | -1,16179 |
| <b>Bsg</b>           | FBgn0261822  | FBtr0079570,FBtr0079568,FBtr0079569,FBtr0079573,FBtr0079567,FBtr0079571,FBtr0079572,FBtr0079566 | 1764  | 3947  | 9,57366E-279 | -1,16191 |
| <b>tup</b>           | FBgn0003896  | FBtr0081112                                                                                     | 224   | 503   | 2,47060E-36  | -1,16706 |
| <b>qkr58E-3</b>      | FBgn0022984  | FBtr0290254                                                                                     | 1092  | 2461  | 5,28351E-176 | -1,17227 |
| <b>CG8500</b>        | FBgn0037754  | FBtr0082139                                                                                     | 192   | 433   | 1,25381E-31  | -1,17326 |
| <b>mrj</b>           | FBgn0034091  | FBtr0087193,FBtr0087194,FBtr0087195,FBtr0087196,FBtr0113084,FBtr0306652,FBtr0306653             | 623   | 1405  | 7,10353E-101 | -1,17327 |
| <b>TotA</b>          | FBgn0028396  | FBtr0083971                                                                                     | 117   | 264   | 1,45357E-19  | -1,17403 |
| <b>Gs1</b>           | FBgn0001142  | FBtr0078114                                                                                     | 224   | 506   | 7,69237E-37  | -1,17564 |
| <b>how</b>           | FBgn0017397  | FBtr0301401                                                                                     | 1792  | 4049  | 3,78457E-290 | -1,17599 |
| <b>CG11727</b>       | FBgn0262740  | FBtr0073547                                                                                     | 840   | 1902  | 4,30508E-137 | -1,17906 |
| <b>lin19</b>         | FBgn0015509  | FBtr0088846                                                                                     | 140   | 317   | 1,95354E-23  | -1,17906 |
| <b>tup</b>           | FBgn0003896  | FBtr0081111                                                                                     | 222   | 503   | 7,20278E-37  | -1,18000 |
| <b>pho</b>           | FBgn0002521  | FBtr0089204,FBtr0089205                                                                         | 1815  | 4113  | 4,29367E-296 | -1,18022 |
| <b>Mhcl</b>          | FBgn0026059  | FBtr0083231                                                                                     | 176   | 399   | 1,89475E-29  | -1,18081 |
| <b>CG11266</b>       | FBgn0031883  | FBtr0089638,FBtr0089639,FBtr0089635                                                             | 228   | 517   | 8,36609E-38  | -1,18113 |
| <b>CaMKI</b>         | FBgn0016126  | FBtr0089065                                                                                     | 552   | 1255  | 2,73006E-91  | -1,18495 |
| <b>Hr46</b>          | FBgn0000448  | FBtr0306346                                                                                     | 405   | 922   | 2,46024E-67  | -1,18684 |
| <b>CG5065</b>        | FBgn0034145  | FBtr0087108,FBtr0302206                                                                         | 161   | 367   | 2,40451E-27  | -1,18872 |
| <b>CG4768</b>        | FBgn0030790  | FBtr0074332                                                                                     | 470   | 1073  | 1,10401E-78  | -1,19092 |
| <b>mRpS5</b>         | FBgn0044510  | FBtr0111147,FBtr0111146                                                                         | 489   | 1117  | 6,09039E-82  | -1,19172 |
| <b>tna</b>           | FBgn0026160  | FBtr0076267                                                                                     | 876   | 2005  | 6,77293E-147 | -1,19460 |
| <b>CG11266</b>       | FBgn0031883  | FBtr0089637                                                                                     | 228   | 522   | 7,67132E-39  | -1,19502 |
| <b>tal-2A</b>        | FBgn0259731  | FBtr0299998                                                                                     | 442   | 1015  | 5,74508E-75  | -1,19936 |
| <b>tal-1A</b>        | FBgn0259730  | FBtr0299997                                                                                     | 442   | 1015  | 5,74508E-75  | -1,19936 |
| <b>tal-3A</b>        | FBgn0259732  | FBtr0299999                                                                                     | 442   | 1015  | 5,74508E-75  | -1,19936 |
| <b>tal-AA</b>        | FBgn0259733  | FBtr0299996                                                                                     | 442   | 1015  | 5,74508E-75  | -1,19936 |
| <b>mt:Cyt-b</b>      | FBgn0013678  | FBtr0100884                                                                                     | 14497 | 33560 | 0,00000E+00  | -1,21099 |
| <b>Pdk1</b>          | FBgn0020386  | FBtr0072470,FBtr0072471,FBtr0072466,FBtr0072467                                                 | 895   | 2088  | 2,96546E-157 | -1,22216 |
| <b>CG30343</b>       | FBgn0050343  | FBtr0308205                                                                                     | 202   | 474   | 1,19602E-36  | -1,23053 |
| <b>qkr58E-3</b>      | FBgn0022984  | FBtr0307214                                                                                     | 1156  | 2715  | 2,27542E-206 | -1,23181 |
| <b>CG11727</b>       | FBgn0262740  | FBtr0300733                                                                                     | 663   | 1561  | 2,60548E-119 | -1,23539 |
| <b>CR41597</b>       | FBgn0085810  | FBtr0114264                                                                                     | 218   | 514   | 7,05753E-40  | -1,23744 |
| <b>CG4662</b>        | FBgn0038735  | FBtr0083814                                                                                     | 119   | 281   | 2,77533E-22  | -1,23961 |
| <b>CG17715</b>       | FBgn0041004  | FBtr0111249                                                                                     | 893   | 2109  | 1,11451E-161 | -1,23983 |
| <b>E2f</b>           | FBgn0011766  | FBtr0084119                                                                                     | 306   | 723   | 5,50342E-56  | -1,24046 |
| <b>Zyx</b>           | FBgn0011642  | FBtr0089210,FBtr0089213,FBtr0089215                                                             | 256   | 605   | 6,64457E-47  | -1,24079 |
| <b>Zyx</b>           | FBgn0011642  | FBtr0089211,FBtr0089212,FBtr0089214,FBtr0089216                                                 | 297   | 702   | 2,62206E-54  | -1,24101 |
| <b>CG17683</b>       | FBgn0262115  | FBtr0111301                                                                                     | 158   | 374   | 2,17093E-29  | -1,24311 |
| <b>mt:CollI</b>      | FBgn0013676  | FBtr0100868                                                                                     | 33823 | 80212 | 0,00000E+00  | -1,24581 |
| <b>AP-1gamma</b>     | FBgn0030089  | FBtr0071295,FBtr0071297,FBtr0071298,FBtr0112965                                                 | 99    | 235   | 8,37405E-19  | -1,24716 |
| <b>CG15923</b>       | FBgn0038814  | FBtr0113254                                                                                     | 877   | 2089  | 3,57269E-162 | -1,25216 |
| <b>zip</b>           | FBgn0005634  | FBtr0072399,FBtr0100466,FBtr0100467,FBtr0302572,FBtr0302573,FBtr0302574,FBtr0302575,FBtr0306576 | 1131  | 2712  | 1,96335E-212 | -1,26176 |
| <b>gus</b>           | FBgn0026238  | FBtr0089755,FBtr0089752,FBtr0089754,FBtr0089757,FBtr0089753,FBtr0089756                         | 558   | 1339  | 2,36463E-105 | -1,26282 |
| <b>CG17715</b>       | FBgn0041004  | FBtr0111247                                                                                     | 621   | 1491  | 2,61716E-117 | -1,26362 |
| <b>gro</b>           | FBgn0001139  | FBtr0305047                                                                                     | 1898  | 4562  | 0,00000E+00  | -1,26519 |
| <b>PRL-1</b>         | FBgn0024734  | FBtr0080857,FBtr0080856                                                                         | 3306  | 8009  | 0,00000E+00  | -1,27654 |
| <b>myoglianin</b>    | FBgn0026199  | FBtr0089095                                                                                     | 110   | 267   | 5,02911E-22  | -1,27934 |
| <b>syd</b>           | FBgn0024187  | FBtr0076769,FBtr0300412,FBtr0300413                                                             | 129   | 314   | 8,16745E-26  | -1,28339 |
| <b>Pi4KIIalpha</b>   | FBgn0037339  | FBtr0078755,FBtr0078756,FBtr0078757                                                             | 111   | 272   | 1,20779E-22  | -1,29305 |
| <b>Hr46</b>          | FBgn0000448  | FBtr0306345                                                                                     | 864   | 2122  | 7,22224E-172 | -1,29632 |
| <b>PMCA</b>          | FBgn0259214  | FBtr0304046,FBtr0304047,FBtr0304048,FBtr0304049,FBtr0300554,FBtr0300555,FBtr0300556,FBtr0300557 | 306   | 753   | 1,07181E-61  | -1,29912 |
| <b>CG8419</b>        | FBgn0031999  | FBtr0079589                                                                                     | 164   | 404   | 1,56062E-33  | -1,30066 |
| <b>sky</b>           | FBgn0032901  | FBtr0081445                                                                                     | 310   | 764   | 1,08040E-62  | -1,30130 |

|                  |             |                                                                                                                         |       |       |              |          |
|------------------|-------------|-------------------------------------------------------------------------------------------------------------------------|-------|-------|--------------|----------|
| <b>CG12567</b>   | FBgn0039958 | FBtr0113704,FBtr0113705,FBtr0300702,FBtr0300703,FBtr0300704                                                             | 533   | 1316  | 1,19764E-107 | -1,30395 |
| <b>plexA</b>     | FBgn0025741 | FBtr0089225,FBtr0089226,FBtr0089223                                                                                     | 230   | 573   | 7,52185E-48  | -1,31690 |
| <b>CadN</b>      | FBgn0015609 | FBtr0081016,FBtr0081015,FBtr0100313,FBtr0100315                                                                         | 170   | 424   | 9,70881E-36  | -1,31853 |
| <b>gish</b>      | FBgn0250823 | FBtr0083262,FBtr0083261,FBtr0083265,FBtr0083264,FBtr0100332,FBtr0100333                                                 | 924   | 2311  | 8,11501E-192 | -1,32255 |
| <b>grk</b>       | FBgn0001137 | FBtr0079708                                                                                                             | 135   | 338   | 9,55854E-29  | -1,32406 |
| <b>lin19</b>     | FBgn0015509 | FBtr0088845                                                                                                             | 121   | 304   | 5,12092E-26  | -1,32906 |
| <b>CG6357</b>    | FBgn0033875 | FBtr0087638                                                                                                             | 267   | 671   | 1,28653E-56  | -1,32947 |
| <b>CrebA</b>     | FBgn0004396 | FBtr0075558                                                                                                             | 1399  | 3520  | 2,46196E-294 | -1,33118 |
| <b>Zyx</b>       | FBgn0011642 | FBtr0089210,FBtr0089213                                                                                                 | 181   | 457   | 5,03067E-39  | -1,33620 |
| <b>CG17698</b>   | FBgn0040056 | FBtr0111168,FBtr0111167                                                                                                 | 372   | 941   | 1,10358E-79  | -1,33889 |
| <b>dbr</b>       | FBgn0067779 | FBtr0306536,FBtr0306538                                                                                                 | 152   | 386   | 2,55554E-33  | -1,34453 |
| <b>qkr54B</b>    | FBgn0022987 | FBtr0306248                                                                                                             | 707   | 1804  | 7,07324E-154 | -1,35142 |
| <b>vn</b>        | FBgn0003984 | FBtr0077082                                                                                                             | 283   | 725   | 1,26624E-62  | -1,35718 |
| <b>Ptp10D</b>    | FBgn0004370 | FBtr0073525,FBtr0073522                                                                                                 | 366   | 942   | 1,05130E-81  | -1,36388 |
| <b>bw</b>        | FBgn0000241 | FBtr0072117                                                                                                             | 134   | 345   | 2,44673E-30  | -1,36436 |
| <b>elF-4B</b>    | FBgn0020660 | FBtr0113679                                                                                                             | 182   | 469   | 4,02730E-41  | -1,36565 |
| <b>H</b>         | FBgn0001169 | FBtr0083915,FBtr0083916                                                                                                 | 225   | 580   | 1,15099E-50  | -1,36613 |
| <b>crq</b>       | FBgn0015924 | FBtr0078087                                                                                                             | 644   | 1670  | 1,60109E-145 | -1,37472 |
| <b>CG17683</b>   | FBgn0262115 | FBtr0111298,FBtr0111299                                                                                                 | 94    | 244   | 6,34165E-22  | -1,37615 |
| <b>Zyx</b>       | FBgn0011642 | FBtr0089212,FBtr0089215                                                                                                 | 182   | 476   | 1,95322E-42  | -1,38702 |
| <b>Lsd-1</b>     | FBgn0039114 | FBtr0084455,FBtr0084456,FBtr0084457                                                                                     | 76    | 199   | 3,26991E-18  | -1,38870 |
| <b>Zyx</b>       | FBgn0011642 | FBtr0089211,FBtr0089216                                                                                                 | 181   | 474   | 2,2363E-42   | -1,38890 |
| <b>inx2</b>      | FBgn0027108 | FBtr0071005,FBtr0071006                                                                                                 | 15078 | 39521 | 0,00000E+00  | -1,39017 |
| <b>Muc11A</b>    | FBgn0052656 | FBtr0089803                                                                                                             | 144   | 378   | 4,09263E-34  | -1,39232 |
| <b>Mnt</b>       | FBgn0023215 | FBtr0307278,FBtr0301823                                                                                                 | 803   | 2113  | 1,68494E-187 | -1,39582 |
| <b>Hsc70-3</b>   | FBgn0001218 | FBtr0073608                                                                                                             | 85    | 225   | 8,05487E-21  | -1,40439 |
| <b>Pur-alpha</b> | FBgn0022361 | FBtr0089996,FBtr0089995,FBtr0089994,FBtr0089993                                                                         | 514   | 1363  | 2,88923E-122 | -1,40695 |
| <b>CG30343</b>   | FBgn0050343 | FBtr0088594                                                                                                             | 293   | 778   | 3,55503E-70  | -1,40887 |
| <b>sgg</b>       | FBgn0003371 | FBtr0070475,FBtr0070476,FBtr0301966                                                                                     | 1341  | 3564  | 7,5676E-320  | -1,41019 |
| <b>Cklalpha</b>  | FBgn0015024 | FBtr0073680                                                                                                             | 5372  | 14301 | 0,00000E+00  | -1,41258 |
| <b>CG17528</b>   | FBgn0261387 | FBtr0111274                                                                                                             | 85    | 227   | 3,35784E-21  | -1,41716 |
| <b>CaMKI</b>     | FBgn0016126 | FBtr0089067                                                                                                             | 181   | 484   | 1,89474E-44  | -1,41902 |
| <b>stai</b>      | FBgn0051641 | FBtr0304908                                                                                                             | 2437  | 6517  | 0,00000E+00  | -1,41910 |
| <b>stai</b>      | FBgn0051641 | FBtr0079196,FBtr0079197,FBtr0079198                                                                                     | 2424  | 6490  | 0,00000E+00  | -1,42083 |
| <b>sgg</b>       | FBgn0003371 | FBtr0070471,FBtr0070472,FBtr0070473,FBtr0070466,FBtr0070468,FBtr0070469,FBtr0070470                                     | 1345  | 3607  | 0,00000E+00  | -1,42319 |
| <b>CG42258</b>   | FBgn0259143 | FBtr0299558,FBtr0299559                                                                                                 | 426   | 1149  | 2,40675E-105 | -1,43145 |
| <b>lola</b>      | FBgn0005630 | FBtr0089365,FBtr0089347,FBtr0089361,FBtr0089360,FBtr0089366,FBtr0089355,FBtr0089354,FBtr0089346,FBtr0089345,FBtr0089364 | 192   | 518   | 5,82406E-48  | -1,43185 |
| <b>zip</b>       | FBgn0005634 | FBtr0072398                                                                                                             | 1540  | 4169  | 0,00000E+00  | -1,43677 |
| <b>fwe</b>       | FBgn0261722 | FBtr0075543                                                                                                             | 91    | 250   | 4,98808E-24  | -1,45799 |
| <b>Antp</b>      | FBgn0260642 | FBtr0082858                                                                                                             | 13736 | 37797 | 0,00000E+00  | -1,46031 |
| <b>pAbp</b>      | FBgn0261619 | FBtr0081647,FBtr0081648,FBtr0081649,FBtr0081650,FBtr0081651,FBtr0081652,FBtr0081653,FBtr0081656                         | 672   | 1855  | 1,08982E-174 | -1,46489 |
| <b>pAbp</b>      | FBgn0261619 | FBtr0086738                                                                                                             | 446   | 1240  | 6,88759E-118 | -1,47522 |
| <b>pAbp</b>      | FBgn0261619 | FBtr0086743,FBtr0086739                                                                                                 | 446   | 1240  | 6,88759E-118 | -1,47522 |
| <b>CaMKII</b>    | FBgn0004624 | FBtr0089218,FBtr0089219,FBtr0089217                                                                                     | 554   | 1545  | 2,71559E-147 | -1,47965 |
| <b>CaMKII</b>    | FBgn0004624 | FBtr0100146,FBtr0100147,FBtr0100148,FBtr0300378                                                                         | 554   | 1546  | 1,74278E-147 | -1,48058 |
| <b>CG8745</b>    | FBgn0036381 | FBtr0075801                                                                                                             | 96    | 268   | 3,08241E-26  | -1,48113 |
| <b>CR43241</b>   | FBgn0262886 | FBtr0306297                                                                                                             | 98    | 274   | 9,98207E-27  | -1,48332 |
| <b>Hr46</b>      | FBgn0000448 | FBtr0088366,FBtr0088368,FBtr0112799,FBtr0302438                                                                         | 659   | 1848  | 2,53620E-177 | -1,48761 |
| <b>CaMKI</b>     | FBgn0016126 | FBtr0089069                                                                                                             | 70    | 198   | 8,66801E-20  | -1,50007 |
| <b>Mbs</b>       | FBgn0005536 | FBtr0112850,FBtr0112851,FBtr0112852,FBtr0301472,FBtr0301473,FBtr0301575,FBtr0308213,FBtr0308214,FBtr0308215,FBtr0308216 | 466   | 1340  | 1,53076E-132 | -1,52383 |
| <b>CG41520</b>   | FBgn0087011 | FBtr0114111,FBtr0114112,FBtr0302581,FBtr0302582                                                                         | 134   | 390   | 1,27207E-39  | -1,54124 |
| <b>Fas3</b>      | FBgn0000636 | FBtr0081051,FBtr0081052                                                                                                 | 2666  | 7762  | 0,00000E+00  | -1,54175 |
| <b>Cklbeta</b>   | FBgn0000259 | FBtr0073562                                                                                                             | 63    | 185   | 1,95058E-19  | -1,55410 |
| <b>Ank</b>       | FBgn0011747 | FBtr0089174                                                                                                             | 157   | 465   | 6,28408E-48  | -1,56647 |
| <b>CG17715</b>   | FBgn0041004 | FBtr0111244,FBtr0111246,FBtr0111245,FBtr0111248,FBtr0306550,FBtr0306551                                                 | 200   | 593   | 5,68733E-61  | -1,56803 |
| <b>dbr</b>       | FBgn0067779 | FBtr0078100,FBtr0306537,FBtr0306539                                                                                     | 180   | 540   | 1,99059E-56  | -1,58496 |
| <b>Nrg</b>       | FBgn0002968 | FBtr0071207,FBtr0071209,FBtr0301762,FBtr0301764,FBtr0305914                                                             | 1144  | 3445  | 0,00000E+00  | -1,59042 |
| <b>Df31</b>      | FBgn0022893 | FBtr0085919,FBtr0085920                                                                                                 | 27141 | 81808 | 0,00000E+00  | -1,59177 |
| <b>Df31</b>      | FBgn0022893 | FBtr0100293                                                                                                             | 27249 | 82324 | 0,00000E+00  | -1,59511 |
| <b>pallidin</b>  | FBgn0036192 | FBtr0300097,FBtr0300725,FBtr0300726                                                                                     | 93    | 282   | 4,31882E-30  | -1,60039 |
| <b>Cam</b>       | FBgn0000253 | FBtr0088001,FBtr0088002                                                                                                 | 7691  | 23442 | 0,00000E+00  | -1,60785 |
| <b>Galpha49B</b> | FBgn0004435 | FBtr0304955                                                                                                             | 1132  | 3452  | 0,00000E+00  | -1,60856 |
| <b>mt:Coll</b>   | FBgn0013675 | FBtr0100863                                                                                                             | 10541 | 32317 | 0,00000E+00  | -1,61628 |
| <b>gish</b>      | FBgn0250823 | FBtr0083263                                                                                                             | 1002  | 3086  | 0,00000E+00  | -1,62286 |
| <b>Fbp1</b>      | FBgn0000639 | FBtr0075750                                                                                                             | 8274  | 25614 | 0,00000E+00  | -1,63028 |
| <b>Fbp1</b>      | FBgn0000639 | FBtr0075749                                                                                                             | 8273  | 25613 | 0,00000E+00  | -1,63039 |
| <b>Akap200</b>   | FBgn0027932 | FBtr0079665,FBtr0079667                                                                                                 | 5459  | 16929 | 0,00000E+00  | -1,63279 |
| <b>Akap200</b>   | FBgn0027932 | FBtr0079664,FBtr0079666                                                                                                 | 5459  | 16932 | 0,00000E+00  | -1,63304 |
| <b>elF-4B</b>    | FBgn0020660 | FBtr0113680                                                                                                             | 70    | 218   | 5,21822E-24  | -1,63890 |
| <b>Mnt</b>       | FBgn0023215 | FBtr0307277,FBtr0301822                                                                                                 | 882   | 2748  | 7,28101E-296 | -1,63953 |
| <b>CG17115</b>   | FBgn0027515 | FBtr0079523                                                                                                             | 98    | 306   | 1,38606E-33  | -1,64268 |
| <b>CG11266</b>   | FBgn0031883 | FBtr0089639,FBtr0089635                                                                                                 | 63    | 197   | 6,85753E-22  | -1,64477 |
| <b>Pdp1</b>      | FBgn0016694 | FBtr0076775,FBtr0076776,FBtr0076777,FBtr0076780,FBtr0076782,FBtr0300499,FBtr0300500                                     | 194   | 608   | 2,88267E-66  | -1,64801 |
| <b>Rfabg</b>     | FBgn0087002 | FBtr0089188                                                                                                             | 676   | 2127  | 1,72179E-231 | -1,65372 |
| <b>CG7367</b>    | FBgn0031976 | FBtr0306002                                                                                                             | 102   | 323   | 5,14858E-36  | -1,66297 |
| <b>Pdp1</b>      | FBgn0016694 | FBtr0306535                                                                                                             | 195   | 623   | 3,12539E-69  | -1,67576 |

|                                      |             |                                                                         |       |        |              |           |
|--------------------------------------|-------------|-------------------------------------------------------------------------|-------|--------|--------------|-----------|
| <b>Hr39</b>                          | FBgn0261239 | FBtr0081480                                                             | 302   | 966    | 3,61776E-107 | -1,67747  |
| <b>mt:Col</b>                        | FBgn0013674 | FBtr0100861                                                             | 45828 | 146749 | 0,00000E+00  | -1,67905  |
| <b>CG7367</b>                        | FBgn0031976 | FBtr0301128                                                             | 143   | 460    | 1,05238E-51  | -1,68562  |
| <b>Ank</b>                           | FBgn0011747 | FBtr0089173,FBtr0089171,FBtr0089172,FBtr0300497,FBtr0300498             | 133   | 429    | 1,99072E-48  | -1,68955  |
| <b>swi2</b>                          | FBgn0034262 | FBtr0086889                                                             | 88    | 284    | 2,22491E-32  | -1,69032  |
| <b>Pabp2</b>                         | FBgn0005648 | FBtr0088786                                                             | 143   | 462    | 3,99826E-52  | -1,69188  |
| <b>Cam</b>                           | FBgn0000253 | FBtr0304963,FBtr0304964                                                 | 8288  | 26840  | 0,00000E+00  | -1,69529  |
| <b>Pdp1</b>                          | FBgn0016694 | FBtr0076776,FBtr0076777,FBtr0300499,FBtr0306535                         | 80    | 265    | 7,38196E-31  | -1,72792  |
| <b>Eph</b>                           | FBgn0025936 | FBtr0089082,FBtr0089083,FBtr0089084                                     | 370   | 1229   | 2,35036E-141 | -1,73189  |
| <b>Akap200</b>                       | FBgn0027932 | FBtr0079665                                                             | 95    | 324    | 8,68849E-39  | -1,76999  |
| <b>Galpha49B</b>                     | FBgn0004435 | FBtr0087829,FBtr0087830,FBtr0087831,FBtr0087833,FBtr0087834,FBtr0304954 | 710   | 2445   | 1,24882E-290 | -1,78394  |
| <b>ventrally-expressed-protein-D</b> | FBgn0053200 | FBtr0307213                                                             | 48    | 167    | 8,87292E-21  | -1,79874  |
| <b>H</b>                             | FBgn0001169 | FBtr0083914,FBtr0083917                                                 | 541   | 1911   | 1,09283E-232 | -1,82063  |
| <b>Eph</b>                           | FBgn0025936 | FBtr0089086                                                             | 303   | 1076   | 8,65538E-132 | -1,82829  |
| <b>myoglianin</b>                    | FBgn0026199 | FBtr0089092,FBtr0089093                                                 | 105   | 373    | 3,33842E-46  | -1,82879  |
| <b>CG14526</b>                       | FBgn0027578 | FBtr0301945                                                             | 46    | 164    | 9,10662E-21  | -1,83399  |
| <b>CG2225</b>                        | FBgn0032957 | FBtr0304885                                                             | 133   | 476    | 5,49543E-59  | -1,83954  |
|                                      |             | FBtr0076660                                                             | 623   | 2241   | 3,80748E-277 | -1,84684  |
| <b>Hr39</b>                          | FBgn0261239 | FBtr0081479,FBtr0081481                                                 | 881   | 3193   | 0,00000E+00  | -1,85770  |
| <b>CG32016</b>                       | FBgn0052016 | FBtr0089232                                                             | 84    | 307    | 5,03507E-39  | -1,86978  |
| <b>CG9894</b>                        | FBgn0031453 | FBtr0307080                                                             | 4227  | 15511  | 0,00000E+00  | -1,87559  |
| <b>Cyp6g1</b>                        | FBgn0025454 | FBtr0087992                                                             | 66    | 243    | 3,09904E-31  | -1,88042  |
| <b>CG9894</b>                        | FBgn0031453 | FBtr0077713,FBtr0077714,FBtr0307080                                     | 1452  | 5391   | 0,00000E+00  | -1,89251  |
| <b>pncr013:4</b>                     | FBgn0262731 | FBtr0303019                                                             | 94    | 351    | 2,11269E-45  | -1,90074  |
| <b>UBL3</b>                          | FBgn0026076 | FBtr0074175                                                             | 54    | 204    | 7,39942E-27  | -1,91754  |
| <b>CG10417</b>                       | FBgn0033021 | FBtr0086092                                                             | 90    | 341    | 1,07016E-44  | -1,92177  |
| <b>CG9894</b>                        | FBgn0031453 | FBtr0077713,FBtr0077714                                                 | 2930  | 11197  | 0,00000E+00  | -1,93414  |
| <b>Fbp2</b>                          | FBgn000640  | FBtr0079808                                                             | 817   | 3125   | 0,00000E+00  | -1,93545  |
| <b>CG32016</b>                       | FBgn0052016 | FBtr0089229                                                             | 82    | 321    | 2,67820E-43  | -1,96888  |
| <b>CG17471</b>                       | FBgn0039924 | FBtr0100544                                                             | 60    | 238    | 1,42722E-32  | -1,98793  |
| <b>CG17471</b>                       | FBgn0039924 | FBtr0100543                                                             | 60    | 241    | 2,92884E-33  | -2,00600  |
| <b>CG32016</b>                       | FBgn0052016 | FBtr0089233                                                             | 105   | 424    | 2,21138E-58  | -2,01367  |
| <b>CG5958</b>                        | FBgn0031913 | FBtr0079466                                                             | 32    | 135    | 1,47629E-19  | -2,07682  |
| <b>CR43241</b>                       | FBgn0262886 | FBtr0306296                                                             | 34    | 149    | 4,12348E-22  | -2,13171  |
| <b>nimC2</b>                         | FBgn0028939 | FBtr0080589,FBtr0080588                                                 | 69    | 304    | 7,11246E-45  | -2,13940  |
| <b>CG12990</b>                       | FBgn0030859 | FBtr0074479                                                             | 49    | 226    | 1,21449E-34  | -2,20547  |
| <b>Rbp1-like</b>                     | FBgn0030479 | FBtr0073790                                                             | 215   | 997    | 5,50079E-151 | -2,21326  |
| <b>TpnC25D</b>                       | FBgn0031692 | FBtr0079063                                                             | 38    | 178    | 9,44630E-28  | -2,22781  |
| <b>E2f</b>                           | FBgn0011766 | FBtr0084118                                                             | 120   | 569    | 1,13696E-87  | -2,24539  |
| <b>CG10417</b>                       | FBgn0033021 | FBtr0086091                                                             | 100   | 485    | 4,95101E-76  | -2,27798  |
| <b>CG40196</b>                       | FBgn0058196 | FBtr0113829,FBtr0113830,FBtr0301121                                     | 53    | 258    | 7,55758E-41  | -2,28331  |
| <b>CG9879</b>                        | FBgn0033669 | FBtr0088052                                                             | 64    | 316    | 2,18492E-50  | -2,30378  |
| <b>Act5C</b>                         | FBgn0000042 | FBtr0070822,FBtr0100662,FBtr0100663                                     | 1371  | 7183   | 0,00000E+00  | -2,38936  |
| <b>UBL3</b>                          | FBgn0026076 | FBtr0074174,FBtr0300787                                                 | 94    | 533    | 7,58301E-92  | -2,50340  |
| <b>Pabp2</b>                         | FBgn0005648 | FBtr0088785                                                             | 941   | 5443   | 0,00000E+00  | -2,53214  |
| <b>CG2233</b>                        | FBgn0029990 | FBtr0071123                                                             | 192   | 1126   | 3,64705E-197 | -2,55203  |
| <b>mt:tRNA:G</b>                     | FBgn0013694 | FBtr0100869                                                             | 18    | 115    | 1,31510E-21  | -2,67557  |
| <b>mt:tRNA:Y</b>                     | FBgn0013710 | FBtr0100860                                                             | 15    | 96     | 3,07578E-18  | -2,67807  |
| <b>CG3999</b>                        | FBgn0037801 | FBtr0082225                                                             | 21    | 135    | 2,00174E-25  | -2,68450  |
| <b>CG10006</b>                       | FBgn0036461 | FBtr0113171                                                             | 19    | 124    | 1,43049E-23  | -2,70627  |
| <b>CG32016</b>                       | FBgn0052016 | FBtr0089234                                                             | 33    | 217    | 1,13543E-40  | -2,71716  |
| <b>Zyx</b>                           | FBgn0011642 | FBtr0089210,FBtr0089211,FBtr0089212                                     | 39    | 257    | 3,55007E-48  | -2,72022  |
| <b>Zyx</b>                           | FBgn0011642 | FBtr0089213,FBtr0089215,FBtr0089216                                     | 39    | 257    | 3,55007E-48  | -2,72022  |
| <b>Zyx</b>                           | FBgn0011642 | FBtr0089214                                                             | 38    | 255    | 2,51803E-48  | -2,74643  |
| <b>mt:ND4</b>                        | FBgn0262952 | FBtr0100879                                                             | 1500  | 11843  | 0,00000E+00  | -2,98100  |
| <b>mt:tRNA:W</b>                     | FBgn0013709 | FBtr0100858                                                             | 14    | 112    | 2,85095E-23  | -3,00000  |
| <b>pncr013:4</b>                     | FBgn0262731 | FBtr0303020,FBtr0303021                                                 | 77    | 623    | 1,71565E-127 | -3,01630  |
| <b>mt:ND5</b>                        | FBgn0013684 | FBtr0100877                                                             | 3108  | 26146  | 0,00000E+00  | -3,07253  |
| <b>mt:ND3</b>                        | FBgn0013681 | FBtr0100870                                                             | 99    | 871    | 2,46348E-184 | -3,13717  |
| <b>CG10514</b>                       | FBgn0039312 | FBtr0084864                                                             | 11    | 132    | 1,97103E-31  | -3,58496  |
| <b>CG10513</b>                       | FBgn0039311 | FBtr0114505                                                             | 6     | 78     | 2,91618E-19  | -3,70044  |
| <b>CG11892</b>                       | FBgn0039313 | FBtr0089644                                                             | 18    | 235    | 4,90467E-57  | -3,70659  |
| <b>CG11892</b>                       | FBgn0039313 | FBtr0089645                                                             | 18    | 235    | 4,90467E-57  | -3,70659  |
| <b>mt:tRNA:C</b>                     | FBgn0013690 | FBtr0100859                                                             | 11    | 144    | 3,36099E-35  | -3,71049  |
| <b>CG32016</b>                       | FBgn0052016 | FBtr0089230,FBtr0089231                                                 | 10    | 133    | 1,17438E-32  | -3,73335  |
| <b>mt:tRNA:L:UUR</b>                 | FBgn0013699 | FBtr0100862                                                             | 7     | 95     | 1,26312E-23  | -3,76250  |
| <b>CG9259</b>                        | FBgn0032913 | FBtr0081464                                                             | 16    | 232    | 7,35809E-58  | -3,85798  |
| <b>mt:ATPase6</b>                    | FBgn0013672 | FBtr0100867                                                             | 2522  | 36678  | 0,00000E+00  | -3,86227  |
| <b>CG40351</b>                       | FBgn0040022 | FBtr0302248                                                             | 4     | 75     | 4,45652E-20  | -4,22882  |
| <b>CG40351</b>                       | FBgn0040022 | FBtr0113869,FBtr0302244                                                 | 4     | 75     | 4,45652E-20  | -4,22882  |
| <b>CG40351</b>                       | FBgn0040022 | FBtr0302243                                                             | 4     | 93     | 6,84826E-26  | -4,53916  |
| <b>CG40351</b>                       | FBgn0040022 | FBtr0113870,FBtr0113871                                                 | 6     | 147    | 5,26998E-41  | -4,61471  |
| <b>CG16727</b>                       | FBgn0038719 | FBtr0083780                                                             | 15    | 386    | 7,41482E-108 | -4,68557  |
| <b>mt:ND1</b>                        | FBgn0013679 | FBtr0100886                                                             | 365   | 9585   | 0,00000E+00  | -4,71481  |
| <b>CG3292</b>                        | FBgn0034710 | FBtr0071783                                                             | 16    | 462    | 2,51399E-131 | -4,85175  |
| <b>mt:ATPase8</b>                    | FBgn0013673 | FBtr0100866                                                             | 567   | 16433  | 0,00000E+00  | -4,85710  |
| <b>mt:lrRNA</b>                      | FBgn0013686 | FBtr0100888                                                             | 32368 | 975604 | 0,00000E+00  | -4,91366  |
| <b>mt:tRNA:P</b>                     | FBgn0013702 | FBtr0100882                                                             | 2     | 62     | 3,78452E-18  | -4,95420  |
| <b>Fst</b>                           | FBgn0037724 | FBtr0082101                                                             | 12    | 374    | 1,64425E-107 | -4,96193  |
| <b>mt:ND2</b>                        | FBgn0013680 | FBtr0100857                                                             | 151   | 5273   | 0,00000E+00  | -5,12600  |
| <b>CG3264</b>                        | FBgn0034712 | FBtr0071781                                                             | 11    | 399    | 6,11024E-117 | -5,18081  |
| <b>CG10505</b>                       | FBgn0034612 | FBtr0071619                                                             | 4     | 146    | 5,00948E-43  | -5,18982  |
| <b>CG7882</b>                        | FBgn0033047 | FBtr0085966                                                             | 2     | 81     | 2,62446E-24  | -5,33985  |
| <b>Mur18B</b>                        | FBgn0030999 | FBtr0074672                                                             | 4     | 182    | 8,03058E-55  | -5,50779  |
| <b>mt:ND6</b>                        | FBgn0013685 | FBtr0100883                                                             | 66    | 3640   | 0,00000E+00  | -5,78533  |
| <b>mt:srRNA</b>                      | FBgn0013688 | FBtr0100890                                                             | 5     | 357    | 1,91917E-111 | -6,15785  |
| <b>mt:tRNA:L:CUN</b>                 | FBgn0013698 | FBtr0100887                                                             | 18    | 1386   | 0,00000E+00  | -6,26679  |
| <b>CG17752</b>                       | FBgn0038718 | FBtr0083779                                                             | 2     | 157    | 2,08322E-49  | -6,29462  |
| <b>mt:ND4L</b>                       | FBgn0013683 | FBtr0100880                                                             | 33    | 2698   | 0,00000E+00  | -6,35328  |
| <b>CG42235</b>                       | FBgn0250757 | FBtr0290137,FBtr0290138,FBtr0290139,FBtr0290140,FBtr0290141             | 0     | 121    | 8,77010E-41  | -Infinity |

|                |             |                         |   |     |             |           |
|----------------|-------------|-------------------------|---|-----|-------------|-----------|
| <b>CG42235</b> | FBgn0250757 | FBtr0290139             | 0 | 104 | 4,86609E-35 | -Infinity |
| <b>CG42235</b> | FBgn0250757 | FBtr0290140             | 0 | 92  | 5,45626E-31 | -Infinity |
| <b>CG2187</b>  | FBgn0017448 | FBtr0085861,FBtr0303376 | 0 | 60  | 3,18975E-20 | -Infinity |
