# Supplementary material for: New Partners in Regulation of Gene Expression: The Enhancer of Trithorax and Polycomb Corto Interacts with Methylated Ribosomal Protein L12 Via Its Chromodomain
Source: PLoS Genet. 2012 Oct 11;8(10):e1003006. doi: 10.1371/journal.pgen.1003006 (PMC3469418; doi:10.1371/journal.pgen.1003006)
Supplement: Table S7 — Genes de-regulated in sd::Gal4>UAS::FH-cortoCD vs sd::Gal4/+ and sd::Gal4>UAS::RpL12-Myc vs sd::Gal4/+. (PDF) [file pgen.1003006.s011.pdf]

| Genes up-regulated in<br><i>sd::Gal4&gt;UAS::FH-cortoCD</i><br>wing discs | Genes up-regulated in<br><i>sd::Gal4&gt;UAS::RpL12-Myc</i><br>wing discs | Shared up-regulated genes | Genes down-regulated in<br><i>sd::Gal4&gt;UAS::FH-cortoCD</i><br>wing discs | Genes down-regulated in<br><i>sd::Gal4&gt;UAS::RpL12-Myc</i><br>wing discs | Shared down-regulated genes |
|---------------------------------------------------------------------------|--------------------------------------------------------------------------|---------------------------|-----------------------------------------------------------------------------|----------------------------------------------------------------------------|-----------------------------|
| 14-3-3zeta                                                                | 7SLRNA:CR32864                                                           | 7SLRNA:CR32864            | A2bp1                                                                       | 4EHP                                                                       | A2bp1                       |
| 7SLRNA:CR32864                                                            | 7SLRNA:CR42652                                                           | 7SLRNA:CR42652            | Act5C                                                                       | A2bp1                                                                      | Act5C                       |
| 7SLRNA:CR42652                                                            | Aats-ala                                                                 | Act57B                    | Adar                                                                        | Act5C                                                                      | Adar                        |
| Abi                                                                       | Aats-glupro                                                              | Act5C                     | Akap200                                                                     | Adar                                                                       | Akap200                     |
| Act57B                                                                    | Act57B                                                                   | Aldh-III                  | akirin                                                                      | Akap200                                                                    | akirin                      |
| Act5C                                                                     | Act5C                                                                    | Arc-p20                   | Ank                                                                         | akirin                                                                     | Ank                         |
| Actn                                                                      | Ahcy13                                                                   | Arp11                     | Antp                                                                        | alph                                                                       | Antp                        |
| Aldh-III                                                                  | Aldh-III                                                                 | asrij                     | AP-1gamma                                                                   | alpha-Man-I                                                                | AP-1gamma                   |
| Arc-p20                                                                   | alphaTry                                                                 | ATPSyn-d                  | Atf6                                                                        | Ank                                                                        | Atf6                        |
| Ar79F                                                                     | Arc-p20                                                                  | B52                       | bowl                                                                        | Antp                                                                       | bowl                        |
| Arp11                                                                     | Arp11                                                                    | Bet5                      | Bsg                                                                         | AP-1gamma                                                                  | Bsg                         |
| asrij                                                                     | ash2                                                                     | betaTub56D                | bun                                                                         | Asator                                                                     | bun                         |
| ATPSyn-Cf6                                                                | asrij                                                                    | bou                       | bw                                                                          | Atf6                                                                       | bw                          |
| ATPSyn-d                                                                  | ATPSyn-b                                                                 | br                        | CadN                                                                        | bbg                                                                        | CadN                        |
| awd                                                                       | ATPSyn-d                                                                 | brat                      | cals                                                                        | bowl                                                                       | cals                        |
| B52                                                                       | B52                                                                      | brm                       | Cam                                                                         | Bsg                                                                        | Cam                         |
| Bet5                                                                      | Bet5                                                                     | Bruce                     | CaMKI                                                                       | bun                                                                        | CaMKI                       |
| betaTub56D                                                                | betaTry                                                                  | btsz                      | CaMKII                                                                      | bw                                                                         | CaMKII                      |
| bou                                                                       | betaTub56D                                                               | capt                      | Cf2                                                                         | CadN                                                                       | Cf2                         |
| br                                                                        | blot                                                                     | Cctgamma                  | CG10006                                                                     | cals                                                                       | CG10006                     |
| brat                                                                      | blw                                                                      | CG10320                   | CG10417                                                                     | Cam                                                                        | CG10417                     |
| brm                                                                       | BM-40-SPARC                                                              | CG10527                   | CG10505                                                                     | CaMKI                                                                      | CG10505                     |
| Bruce                                                                     | bou                                                                      | CG11151                   | CG10513                                                                     | CaMKII                                                                     | CG10513                     |
| btsz                                                                      | br                                                                       | CG11438                   | CG10514                                                                     | CdGAPr                                                                     | CG10514                     |
| capt                                                                      | brat                                                                     | CG11505                   | CG1115                                                                      | Cf2                                                                        | CG1115                      |
| Cchl                                                                      | brm                                                                      | CG11854                   | CG11180                                                                     | CG10006                                                                    | CG11180                     |
| Cctgamma                                                                  | Bruce                                                                    | CG11873                   | CG11266                                                                     | CG10417                                                                    | CG11266                     |
| CG10320                                                                   | btsz                                                                     | CG11876                   | CG11486                                                                     | CG10505                                                                    | CG11486                     |
| CG10418                                                                   | capt                                                                     | CG11943                   | CG11727                                                                     | CG10513                                                                    | CG11727                     |
| CG10527                                                                   | Cct5                                                                     | CG11999                   | CG11892                                                                     | CG10514                                                                    | CG11892                     |
| CG10664                                                                   | Cctgamma                                                                 | CG12203                   | CG12054                                                                     | CG1115                                                                     | CG12054                     |
| CG11015                                                                   | CG10249                                                                  | CG12859                   | CG12567                                                                     | CG11180                                                                    | CG12567                     |
| CG11151                                                                   | CG10320                                                                  | CG13044                   | CG12990                                                                     | CG11266                                                                    | CG12990                     |
| CG11267                                                                   | CG10527                                                                  | CG13185                   | CG13025                                                                     | CG11486                                                                    | CG13025                     |
| CG11438                                                                   | CG10912                                                                  | CG13319                   | CG14135                                                                     | CG11727                                                                    | CG15923                     |
| CG11455                                                                   | CG11151                                                                  | CG13349                   | CG14526                                                                     | CG11892                                                                    | CG16727                     |
| CG11505                                                                   | CG11438                                                                  | CG13393                   | CG15923                                                                     | CG12054                                                                    | CG17471                     |
| CG11699                                                                   | CG11505                                                                  | CG1354                    | CG16727                                                                     | CG12567                                                                    | CG17528                     |
| CG11752                                                                   | CG11854                                                                  | CG13551                   | CG17471                                                                     | CG12990                                                                    | CG17683                     |
| CG11753                                                                   | CG11873                                                                  | CG13630                   | CG17528                                                                     | CG13025                                                                    | CG17698                     |
| CG11854                                                                   | CG11876                                                                  | CG13731                   | CG17683                                                                     | CG13360                                                                    | CG17715                     |
| CG11873                                                                   | CG11943                                                                  | CG14184                   | CG17698                                                                     | CG14292                                                                    | CG17752                     |
| CG11876                                                                   | CG11999                                                                  | CG14235                   | CG17715                                                                     | CG14464                                                                    | CG2225                      |
| CG11943                                                                   | CG12115                                                                  | CG14302                   | CG17752                                                                     | CG15155                                                                    | CG2233                      |
| CG11999                                                                   | CG12125                                                                  | CG14332                   | CG2187                                                                      | CG15406                                                                    | CG30343                     |
| CG12203                                                                   | CG12203                                                                  | CG14566                   | CG2225                                                                      | CG15535                                                                    | CG32016                     |
| CG12384                                                                   | CG12859                                                                  | CG15523                   | CG2233                                                                      | CG15628                                                                    | CG3264                      |
| CG12432                                                                   | CG13044                                                                  | CG1607                    | CG30343                                                                     | CG15923                                                                    | CG3292                      |
| CG12848                                                                   | CG13185                                                                  | CG16936                   | CG32016                                                                     | CG16727                                                                    | CG3999                      |
| CG12859                                                                   | CG13319                                                                  | CG17202                   | CG3264                                                                      | CG17159                                                                    | CG40196                     |
| CG12935                                                                   | CG13323                                                                  | CG1746                    | CG3292                                                                      | CG17471                                                                    | CG40351                     |
| CG13041                                                                   | CG13324                                                                  | CG1753                    | CG3999                                                                      | CG17490                                                                    | CG41520                     |
| CG13044                                                                   | CG13349                                                                  | CG18809                   | CG40196                                                                     | CG17528                                                                    | CG42235                     |
| CG13053                                                                   | CG13393                                                                  | CG2021                    | CG40351                                                                     | CG17683                                                                    | CG42258                     |
| CG13185                                                                   | CG1354                                                                   | CG2200                    | CG41520                                                                     | CG17698                                                                    | CG4502                      |
| CG13319                                                                   | CG13551                                                                  | CG2310                    | CG42235                                                                     | CG17715                                                                    | CG4662                      |
| CG13349                                                                   | CG13630                                                                  | CG2812                    | CG42258                                                                     | CG17752                                                                    | CG4768                      |
| CG13364                                                                   | CG13731                                                                  | CG30025                   | CG4502                                                                      | CG17883                                                                    | CG5059                      |
| CG13393                                                                   | CG14184                                                                  | CG30031                   | CG4662                                                                      | CG18812                                                                    | CG5065                      |
| CG1354                                                                    | CG14235                                                                  | CG30185                   | CG4768                                                                      | CG2225                                                                     | CG6700                      |
| CG13551                                                                   | CG14302                                                                  | CG30410                   | CG5059                                                                      | CG2233                                                                     | CG7115                      |
| CG13630                                                                   | CG14332                                                                  | CG30415                   | CG5065                                                                      | CG2316                                                                     | CG7367                      |

|         |          |           |               |            |                               |
|---------|----------|-----------|---------------|------------|-------------------------------|
| CG2021  | CG32249  | CG5941    | E2f           | CG6091     | Fbp2                          |
| CG2200  | CG32302  | CG6543    | elF-4B        | CG6700     | Fst                           |
| CG2310  | CG32529  | CG6746    | elF5          | CG7115     | fwe                           |
| CG2812  | CG33156  | CG6793    | Eph           | CG7337     | Galpha49B                     |
| CG2862  | CG3321   | CG7267    | eyg           | CG7367     | Gef26                         |
| CG30025 | CG33333  | CG7414    | Fas3          | CG7668     | gish                          |
| CG30031 | CG33346  | CG7580    | Fbp1          | CG7882     | grk                           |
| CG30185 | CG34227  | CG7637    | Fbp2          | CG7971     | gro                           |
| CG30410 | CG34306  | CG7834    | Fst           | CG8116     | gus                           |
| CG30415 | CG34347  | CG8036    | fwe           | CG8419     | H                             |
| CG30423 | CG34383  | CG8184    | Galpha49B     | CG8500     | heph                          |
| CG30499 | CG34417  | CG8191    | Gef26         | CG8949     | how                           |
| CG31126 | CG34422  | CG8664    | gish          | CG8979     | Hr39                          |
| CG31548 | CG3446   | CG9027    | grk           | CG9259     | Hr46                          |
| CG32038 | CG3500   | CG9065    | gro           | CG9821     | hth                           |
| CG32069 | CG3523   | CG9205    | Gs1           | CG9894     | inx2                          |
| CG3214  | CG3609   | CG9350    | gus           |            | kn                            |
| CG32212 | CG3731   | CG9603    | H             |            | l(2)s5379                     |
| CG32276 | CG42238  | CG9674    | heph          |            | lin19                         |
| CG3321  | CG42455  | CG9775    | HmgZ          |            | lola                          |
| CG33333 | CG42497  |           | how           | Cklalpha   | Mbs                           |
| CG34227 | CG42500  | cher      | Hr39          | Cklbeta    | Mhcl                          |
| CG34242 | CG42574  | cic       | Hr46          | clumsy     | Mitf                          |
| CG34250 | CG42669  | CoVa      | Hsc70-3       | CR30055    | Mkk4                          |
| CG34306 | CG42834  | Cpr49Ag   | hth           | CR41597    | Mnt                           |
| CG34347 | CG4542   | CR12628   | inx2          | CR41604    | mrj                           |
| CG34383 | CG4692   | CR31144   | kn            | CR42722    | mRpS5                         |
| CG34417 | CG4769   | CR33222   | l(2)s5379     | CR42723    | mt.ATPase6                    |
| CG34422 | CG5021   | CR34335   | lin19         | CR43241    | mt.ATPase8                    |
| CG34439 | CG5261   | CR40502   | lola          | CrebA      |                               |
| CG3446  | CG5261   | CR40546   | lola          | crq        | mt.Col                        |
| CG3500  | CG5446   | CR40560   | lola          | Csk        | mt.Coll                       |
| CG3560  | CG5527   | CR40596   | Lsd-1         | csu        | mt.CollII                     |
| CG3560  | CG5548   | CR40639   | Mbs           | Cyp6g1     | mt.Cyt-b                      |
| CG3566  | CG5794   | CR40640   | Mhcl          | dally      | mt.IrRNA                      |
| CG3609  | CG5903   | CR40641   | Mitf          | dbp        | mt.ND1                        |
| CG3621  | CG5938   | CR40642   | Mkk4          | Dcp2       | mt.ND2                        |
| CG3625  | CG5941   | CR40668   | Mnt           | Df31       | mt.ND3                        |
| CG3731  | CG6543   | CR40677   | mrj           | Dh44-R2    | mt.ND4                        |
| CG4036  | CG6746   | CR40728   | mRpS5         | Dsp1       | mt.ND4L                       |
| CG42238 | CG6769   | CR40766   | mt.ATPase6    | Dyb        | mt.ND5                        |
| CG42239 | CG6793   | CR41535   | mt.ATPase8    | Dyrk3      | mt.ND6                        |
| CG42377 | CG6933   | CR41539   | mt.Col        | E2f        | mt.srRNA                      |
| CG42455 | CG7267   | CR41540   | mt.Coll       | elF-4a     | mt.tRNA:C                     |
| CG42497 | CG7414   | CR41544   | mt.CollII     | elF-4B     | mt.tRNA:G                     |
| CG42500 | CG7465   | CR41548   | mt.Cyt-b      | elF4G      | mt.tRNA:L:CUN                 |
| CG42574 | CG7580   | CR41583   | mt.IrRNA      | elF5       | mt.tRNA:L:UUR                 |
| CG42834 | CG7637   | CR41602   | mt.ND1        | ens        | mt.tRNA:P                     |
| CG4692  | CG7834   | CR41609   | mt.ND2        | Eph        | mt.tRNA:W                     |
| CG5021  | CG7953   | CR41613   | mt.ND3        | ewg        | mt.tRNA:Y                     |
| CG5261  | CG8036   | Cyt-b5    | mt.ND4        | eyg        | Muc11A                        |
| CG5446  | CG8111   | deltaTry  | mt.ND4L       | Fas3       | Mur18B                        |
| CG5527  | CG8184   | Dhc64C    | mt.ND5        | fbf6       | myoglianin                    |
| CG5548  | CG8191   | dikar     | mt.ND6        | Fbp2       | nimC2                         |
| CG5569  | CG8193   | Doa       | mt.srRNA      | fs(1)h     | Nipped-B                      |
| CG5703  | CG8399   | dom       | mt.tRNA:C     | Fst        | Nos                           |
| CG5794  | CG8661   | dp        | mt.tRNA:G     | fwe        | Nrg                           |
| CG5903  | CG8664   | EF2b      | mt.tRNA:L:CUN | Galpha49B  | ogre                          |
| CG5938  | CG8997   | elF-3p40  | mt.tRNA:L:UUR | Gef26      | pAbp                          |
| CG5941  | CG9027   | fabp      | mt.tRNA:P     | gish       | Pabp2                         |
| CG6543  | CG9065   | ft        | mt.tRNA:W     | grh        | pallidin                      |
| CG6746  | CG9172   | futsch    | mt.tRNA:Y     | grk        | par-1                         |
| CG6793  | CG9205   | fwd       | Muc11A        | gro        | Parp                          |
| CG6878  | CG9331   | gammaTry  | Mur18B        | gus        | Pdk1                          |
| CG6891  | CG9350   | glo       | myoglianin    | H          | Pdp1                          |
| CG7181  | CG9436   | Got2      | nimC2         | Haspin     | pho                           |
| CG7267  | CG9603   | hang      | Nipped-B      | heph       | Pi4KIIalpha                   |
| CG7414  | CG9674   | HERC2     | Nos           | how        | plexA                         |
| CG7580  | CG9775   | Hsc70-4   | Nrg           | Hr39       | PMCA                          |
| CG7603  | cher     | Hsp26     | ogre          | Hr46       | pncr013:4                     |
| CG7630  | chic     | Hsp60     | pAbp          | Hrb98DE    | PRL-1                         |
| CG7637  | cic      | Hsp68     | Pabp2         | hth        | prominin-like                 |
| CG7834  | CoVa     | Hsp70Aa   | pallidin      | Imp        | Ptp10D                        |
| CG8036  | cp309    | Hsp70Ab   | par-1         | inx2       | Pur-alpha                     |
| CG8184  | Cpr49Ag  | Hsp70Ba   | Parp          | itp        | qkr54B                        |
| CG8191  | CR12628  | Hsp70Bb   | Pdk1          | jim        | qkr58E-3                      |
| CG8204  | CR31144  | Hsp70Bbb  | Pdp1          | kn         | R                             |
| CG8206  | CR33222  | Hsp70Bc   | pho           | knrl       | Rbp1-like                     |
| CG8664  | CR34335  | Jon25Bi   | Pi4KIIalpha   | l(2)s5379  | Rbp2                          |
| CG8891  | CR40502  | Jon65Aiii | plexA         | lin19      | RecQ5                         |
| CG9027  | CR40546  | Jon65Aiv  | PMCA          | Lis-1      | Rfabg                         |
| CG9034  | CR40560  | kek5      | pncr013:4     | lola       | Sap47                         |
| CG9065  | CR40596  | kis       | PRL-1         | Marf       | Scm                           |
| CG9205  | CR40639  | ksh       | prominin-like | mask       | Sdc                           |
| CG9240  | CR40640  | l(1)G0230 | Ptp10D        | Mbs        | sdt                           |
| CG9336  | CR40641  | l(2)35Di  | Pur-alpha     | Mhcl       | sgg                           |
| CG9350  | CR40642  | larp      | qkr54B        | mim        | Sh3beta                       |
| CG9603  | CR40668  | LBR       | qkr58E-3      | Mitf       | shi                           |
| CG9669  | CR40677  | Lcp1      | R             | Mkk4       | sky                           |
| CG9674  | CR40728  | Lcp2      | Rbp1-like     | Mmp1       | stai                          |
| CG9775  | CR40766  | Lcp3      | Rbp2          | Mnt        | swi2                          |
| cher    | CR41535  | Lcp4      | RecQ5         | mp         | syd                           |
| cic     | CR41539  | levy      | Rfabg         | mrj        | tal-1A                        |
| cl      | CR41540  | LRP1      | Sap47         | mRpS21     | tal-2A                        |
| CoVa    | CR41544  | m2        | Scm           | mRpS5      | tal-3A                        |
| Cpr49Ag | CR41548  | mamo      | Sdc           | mt.ATPase6 | tal-AA                        |
| Cpr49Ah | CR41583  | mask      | sdt           | mt.ATPase8 | TBPH                          |
| Cpr65Ec | CR41602  | Megalin   | sgg           | mt.Col     | tna                           |
| Cpr66D  | CR41609  | MgstI     | Sh3beta       | mt.Coll    | TpnC25D                       |
| Cpr78E  | CR41613  | Mhc       | shi           | mt.CollII  | UbcD2                         |
| CR12628 | CycG     | Mi-2      | sky           | mt.Cyt-b   | UBL3                          |
| CR31144 | Cyp4e2   | Mical     | stai          | mt.IrRNA   | unk                           |
| CR33222 | Cyt-b5   | mRpL22    | swi2          | mt.ND1     | ventrally-expressed-protein-D |
| CR34335 | deltaTry | mRpL27    | syd           | mt.ND2     | vn                            |

|           |            |              |                               |                               |     |
|-----------|------------|--------------|-------------------------------|-------------------------------|-----|
| CR40469   | Dhc64C     | mRpl33       | tal-1A                        | mt:ND3                        | zip |
| CR40502   | dikar      | mRpl49       | tal-2A                        | mt:ND4                        | zyx |
| CR40546   | Doa        | mRpl52       | tal-3A                        | mt:ND4L                       |     |
| CR40560   | dom        | mRpS16       | tal-AA                        | mt:ND5                        |     |
| CR40596   | dp         | Msp-300      | TBPH                          | mt:ND6                        |     |
| CR40621   | Dph5       | N            | tna                           | mt:srRNA                      |     |
| CR40639   | Dpy-30L1   | nej          | TotA                          | mttRNA:C                      |     |
| CR40640   | dro2       | nocte        | TpnC25D                       | mttRNA:G                      |     |
| CR40641   | Ef1beta    | NP15.6       | tup                           | mttRNA:L:CUN                  |     |
| CR40642   | Ef2b       | Obp56d       | UbcD2                         | mttRNA:L:UUR                  |     |
| CR40668   | EfTuM      | Obp83g       | UBL3                          | mttRNA:P                      |     |
| CR40677   | eIF-2alpha | obst-B       | unk                           | mttRNA:W                      |     |
| CR40728   | eIF-3p40   | olf186-F     | ventrally-expressed-protein-D | mttRNA:Y                      |     |
| CR40766   | fabp       | osa          | vn                            | mub                           |     |
| CR40959   | faf        | Oscp         | zip                           | Muc11A                        |     |
| CR40963   | Fer1HCH    | p16-ARC      | Zyx                           | Mur18B                        |     |
| CR41535   | ft         | pck          |                               | myoglianin                    |     |
| CR41539   | fu12       | pcx          |                               | N                             |     |
| CR41540   | futsch     | Pdsw         |                               | Nedd4                         |     |
| CR41544   | fwd        | PHGPx        |                               | Nhe3                          |     |
| CR41548   | fzo        | pix          |                               | nimC2                         |     |
| CR41583   | gammaTry   | poe          |                               | Nipped-B                      |     |
| CR41602   | glo        | Pros29       |                               | norpA                         |     |
| CR41609   | Got2       | Rack1        |                               | Nos                           |     |
| CR41613   | hang       | Rbcn-3A      |                               | Nrg                           |     |
| CR43334   | HERC2      | RFeSP        |                               | ogre                          |     |
| Cyp4g1    | Hsc70-4    | rg           |                               | ovo                           |     |
| Cypl      | Hsp26      | rhea         |                               | pAbp                          |     |
| Cyt-b5    | Hsp60      | RNaseMRP:RNA |                               | Pabp2                         |     |
| deltaTry  | Hsp68      | RNaseP:RNA   |                               | pallidin                      |     |
| Dhc64C    | Hsp70Aa    | rno          |                               | par-1                         |     |
| dikar     | Hsp70Ab    | Roc1a        |                               | Parp                          |     |
| Doa       | Hsp70Ba    | Rpl115       |                               | Patronin                      |     |
| dom       | Hsp70Bb    | RpL10Ab      |                               | Pdk1                          |     |
| dp        | Hsp70Bbb   | RpL11        |                               | Pdp1                          |     |
| Dsp1      | Hsp70Bc    | RpL12        |                               | pho                           |     |
| Ef2b      | Ing3       | RpL13        |                               | Pi4KIIalpha                   |     |
| eIF-3p40  | Jon25Bi    | RpL13A       |                               | piwi                          |     |
| Elongin-C | Jon25Bii   | RpL17        |                               | Pkn                           |     |
| fabp      | Jon65Aiii  | RpL18        |                               | plexA                         |     |
| fd68A     | Jon65Aiv   | RpL18A       |                               | PMCA                          |     |
| ft        | kek5       | RpL24        |                               | pnocr013:4                    |     |
| futsch    | kis        | RpL26        |                               | PP2A-B'                       |     |
| fwd       | ksh        | RpL27        |                               | PRL-1                         |     |
| gammaTry  | kst        | RpL28        |                               | prominin-like                 |     |
| glo       | I(1)G0230  | RpL29        |                               | Pten                          |     |
| Got2      | I(1)G0334  | RpL3         |                               | Ptp10D                        |     |
| GstD1     | I(2)03659  | RpL31        |                               | pUf68                         |     |
| GstS1     | I(2)03709  | RpL32        |                               | Pur-alpha                     |     |
| hang      | I(2)35Di   | RpL34a       |                               | qkr54B                        |     |
| HERC2     | I(2)tid    | RpL34b       |                               | qkr58E-3                      |     |
| hojp      | larp       | RpL35        |                               | R                             |     |
| HP4       | LBR        | RpL35A       |                               | Ranbp16                       |     |
| Hsc70-4   | Lcp1       | RpL36        |                               | Rbp1-like                     |     |
| Hsp26     | Lcp2       | RpL36A       |                               | Rbp2                          |     |
| Hsp60     | Lcp3       | RpL37A       |                               | RecQ5                         |     |
| Hsp68     | Lcp4       | RpL40        |                               | Rfabg                         |     |
| Hsp70Aa   | levy       | RpL8         |                               | rl                            |     |
| Hsp70Ab   | LRP1       | RpL9         |                               | RpL38                         |     |
| Hsp70Ba   | m2         | RpLP1        |                               | Sap47                         |     |
| Hsp70Bb   | mamo       | RpS10b       |                               | Scm                           |     |
| Hsp70Bbb  | mask       | RpS11        |                               | Sdc                           |     |
| Hsp70Bc   | Mdn1       | RpS12        |                               | sdt                           |     |
| HSPC300   | MED14      | RpS13        |                               | sgg                           |     |
| ldh       | Megalin    | RpS14a       |                               | Sh3beta                       |     |
| janA      | Mgstl      | RpS14b       |                               | shi                           |     |
| Jon25Bi   | Mhc        | RpS15        |                               | sky                           |     |
| Jon65Aiii | Mi-2       | RpS15Ab      |                               | slow                          |     |
| Jon65Aiv  | Mical      | RpS17        |                               | sm                            |     |
| kek5      | MrgBP      | RpS18        |                               | smg                           |     |
| kis       | mRpl22     | RpS19a       |                               | snmRNA:838                    |     |
| ksh       | mRpl27     | RpS20        |                               | spo                           |     |
| I(1)G0230 | mRpl33     | RpS21        |                               | spz4                          |     |
| I(1)G0255 | mRpl35     | RpS23        |                               | stai                          |     |
| I(2)35Di  | mRpl49     | RpS26        |                               | Stlk                          |     |
| I(2)37Cg  | mRpl52     | RpS3         |                               | swi2                          |     |
| I(2)efl   | mRpS16     | RpS30        |                               | syd                           |     |
| larp      | mRpS29     | RpS4         |                               | tal-1A                        |     |
| LBR       | mRpS35     | RpS5a        |                               | tal-2A                        |     |
| Lcp1      | Mrtf       | RpS6         |                               | tal-3A                        |     |
| Lcp2      | Msp-300    | RpS7         |                               | tal-AA                        |     |
| Lcp3      | Mur29B     | RpS8         |                               | Tao-1                         |     |
| Lcp4      | N          | RpS9         |                               | TBPH                          |     |
| levy      | nej        | rut          |                               | tlk                           |     |
| Lin29     | nocte      | scu          |                               | tna                           |     |
| LRP1      | NP15.6     | sea          |                               | TpnC25D                       |     |
| m2        | Obp56d     | shot         |                               | Tsp39D                        |     |
| malpha    | Obp83g     | skpA         |                               | Tsp42Ea                       |     |
| mamo      | obst-B     | sls          |                               | UbcD2                         |     |
| mask      | olf186-F   | Smr          |                               | UBL3                          |     |
| Megalin   | osa        | Sod          |                               | unc-13                        |     |
| mei-P26   | Oscp       | spen         |                               | unk                           |     |
| Mgstl     | p16-ARC    | sta          |                               | ventrally-expressed-protein-D |     |
| Mhc       | pck        | stan         |                               | vfl                           |     |
| Mi-2      | pcx        | Taf10        |                               | vn                            |     |
| Mical     | Pdsw       | Tao-1        |                               | vtd                           |     |
| Mlc2      | Pglym78    | Ten-a        |                               | Wnt4                          |     |
| mRpl17    | Phae1      | Ten-m        |                               | zfh2                          |     |
| mRpl18    | PHGPx      | Tfb1         |                               | zip                           |     |
| mRpl22    | pix        | TfIIA-S      |                               | Zyx                           |     |
| mRpl27    | poe        | Tim10        |                               |                               |     |
| mRpl33    | Ppox       | Tom7         |                               |                               |     |
| mRpl42    | proPO-A1   | Tpl          |                               |                               |     |

|              |              |         |
|--------------|--------------|---------|
| mRpL48       | Pros29       | trol    |
| mRpL49       | Prosalpha5   | trx     |
| mRpL51       | px           | Trxr-1  |
| mRpL52       | r            | tutl    |
| mRpL55       | Rack1        | tweek   |
| mRpS11       | raptor       | tyf     |
| mRpS14       | Rbcn-3A      | uif     |
| mRpS16       | RFeSP        | Updo    |
| Msp-300      | rg           | vfl     |
| N            | rhea         | Vha68-2 |
| Neb-cGP      | RNaseMRP:RNA | vnc     |
| nej          | RNaseP:RNA   | vsg     |
| nocte        | rno          | w       |
| Not1         | Roc1a        | yip7    |
| NP15.6       | RpI15        | zormin  |
| Nurf-38      | RpL10Ab      | zye     |
| Nxt1         | RpL11        |         |
| Obp56d       | RpL12        |         |
| Obp83g       | RpL13        |         |
| Obp99a       | RpL13A       |         |
| obst-B       | RpL17        |         |
| olf186-F     | RpL18        |         |
| Or2a         | RpL18A       |         |
| osa          | RpL24        |         |
| Oscp         | RpL26        |         |
| ox           | RpL27        |         |
| p16-ARC      | RpL28        |         |
| Pcd          | RpL29        |         |
| pck          | RpL3         |         |
| Pcmt         | RpL31        |         |
| pcx          | RpL32        |         |
| PDCD-5       | RpL34a       |         |
| Pdsw         | RpL34b       |         |
| PHGPx        | RpL35        |         |
| pix          | RpL35A       |         |
| ple          | RpL36        |         |
| pncr002:3R   | RpL36A       |         |
| poe          | RpL37a       |         |
| primo-1      | RpL40        |         |
| primo-2      | RpL8         |         |
| Pros29       | RpL9         |         |
| Prosbeta1    | RpLP1        |         |
| Rack1        | RpS10b       |         |
| Rbcn-3A      | RpS11        |         |
| Rcd4         | RpS12        |         |
| RFeSP        | RpS13        |         |
| rg           | RpS14a       |         |
| rhea         | RpS14b       |         |
| RNaseMRP:RNA | RpS15        |         |
| RNaseP:RNA   | RpS15Ab      |         |
| rno          | RpS17        |         |
| Roc1a        | RpS18        |         |
| Rpb11        | RpS19a       |         |
| Rpb12        | RpS20        |         |
| RpI15        | RpS21        |         |
| RpL10Ab      | RpS23        |         |
| RpL11        | RpS26        |         |
| RpL12        | RpS3         |         |
| RpL13        | RpS30        |         |
| RpL13A       | RpS4         |         |
| RpL14        | RpS5a        |         |
| RpL17        | RpS6         |         |
| RpL18        | RpS7         |         |
| RpL18A       | RpS8         |         |
| RpL24        | RpS9         |         |
| RpL26        | Rpt3         |         |
| RpL27        | rut          |         |
| RpL28        | Sac1         |         |
| RpL29        | scf          |         |
| RpL3         | Scsalpha     |         |
| RpL30        | scu          |         |
| RpL31        | sdt          |         |
| RpL32        | sea          |         |
| RpL34a       | Sgs3         |         |
| RpL34b       | shot         |         |
| RpL35        | Sin          |         |
| RpL35A       | skpA         |         |
| RpL36        | sls          |         |
| RpL36A       | Smr          |         |
| RpL37A       | Sod          |         |
| RpL40        | Sop2         |         |
| RpL41        | Sp1          |         |
| RpL7A        | spen         |         |
| RpL8         | Spn27A       |         |
| RpL9         | Spp          |         |
| RpLP1        | sta          |         |
| RpS10b       | stan         |         |
| RpS11        | Taf10        |         |
| RpS12        | Tao-1        |         |
| RpS13        | Ten-a        |         |
| RpS14a       | Ten-m        |         |
| RpS14b       | Tfb1         |         |
| RpS15        | TfIIA-L      |         |
| RpS15Ab      | TfIIA-S      |         |
| RpS17        | Tig          |         |
| RpS18        | Tim10        |         |
| RpS19a       | Tom7         |         |
| RpS20        | Tpi          |         |
| RpS21        | trol         |         |
| RpS23        | trx          |         |
| RpS26        | Trxr-1       |         |
| RpS28b       | Tsp          |         |
| RpS3         | tutl         |         |

|               |         |
|---------------|---------|
| RpS30         | tweek   |
| RpS4          | tyf     |
| RpS5a         | Ubp64E  |
| RpS6          | uif     |
| RpS7          | Updo    |
| RpS8          | vari    |
| RpS9          | vav     |
| rut           | verm    |
| scu           | vfl     |
| SdhC          | Vha68-2 |
| sdk           | vnc     |
| sea           | vsg     |
| shot          | w       |
| skpA          | wdb     |
| sli           | yip7    |
| sls           | zormin  |
| SmD2          | Zw      |
| SmF           | zye     |
| Smr           |         |
| sni           |         |
| snRNA:U12:73B |         |
| Sod           |         |
| Spase12       |         |
| Spase22-23    |         |
| spen          |         |
| sphinx        |         |
| sta           |         |
| stan          |         |
| stv           |         |
| sun           |         |
| Taf10         |         |
| Tao-1         |         |
| Ten-a         |         |
| Ten-m         |         |
| Tfb1          |         |
| TflIA-S       |         |
| Tim10         |         |
| Tina-1        |         |
| Tom7          |         |
| Tpi           |         |
| trol          |         |
| trx           |         |
| Trxr-1        |         |
| tutI          |         |
| tweek         |         |
| tyf           |         |
| uif           |         |
| Updo          |         |
| vfl           |         |
| Vha100-2      |         |
| Vha44         |         |
| Vha68-2       |         |
| vnc           |         |
| Vps28         |         |
| vsg           |         |
| w             |         |
| wb            |         |
| Wnk           |         |
| yip7          |         |
| zormin        |         |
| zye           |         |
